# Supplementary material
Source: publisher site journal article supplement (https://www.dovepress.com/article/234942)
Supplement: Supplementary file 1 [file get_supplementary_file.php]

**Economic burden of chronic obstructive pulmonary disease (COPD): a systematic literature review**

Dr Ike Iheanacho1

Mr Shiyuan Zhang2

Ms Denise King3

Ms Maria Rizzo1

Dr Afisi S Ismaila2,4

1Meta Research, Evidera, London, UK; 2Value Evidence and Outcomes, GlaxoSmithKline plc., Collegeville, PA, USA; 3Value Evidence and Outcomes, GlaxoSmithKline plc., Brentford, UK; 4Department of Health Research Methods, Evidence and Impact, McMaster University, Hamilton, ON, Canada

**Supplementary Appendix**

**Supplementary Table 1** Search strategy for Embase and MEDLINE via the embase.com interface

| **Description** | **#** | **Search string** | **Results** |
| --- | --- | --- | --- |
| Disease | 1 | 'chronic obstructive lung disease'/exp OR emphysema*:ab,ti OR (chronic* NEAR/3 bronch*):ab,ti OR (obstruct* NEAR/3 (pulmonary OR lung* OR airway* OR airflow* OR bronch* OR respirat*)):ab,ti OR copd:ab,ti OR coad:ab,ti OR cobd:ab,ti OR aecb:ab,ti | 182,444 |
| Disease severity | 2 | moderate*:ab,ti OR severe*:ab,ti OR (frequent NEAR/2 (exacerbation* OR hospitalisation* OR hospitalization*)):ab,ti OR 'fev1 50 79%':ab,ti OR 'fev1 50% 79%':ab,ti OR 'fev1 30 49%':ab,ti OR 'fev1 30% 49%':ab,ti OR 'fev1 30':ab,ti OR 'fev1 30%':ab,ti OR ‘frequent exacerbators’:ab,ti OR ((hospitalised OR hospitalized OR frequent OR experienced OR two) near/3 (exacerbations OR exacerbators)):ab,ti | 1,539,954 |
| Economic burden | 3 | 'economics'/de OR 'economic aspect'/de OR 'cost'/de OR 'health care cost'/de OR 'drug cost'/de OR 'hospital cost'/de OR 'socioeconomics'/de OR 'health economics'/de OR 'pharmacoeconomics'/de OR 'fee'/exp OR 'budget'/exp OR 'hospital finance'/de OR 'financial management'/de OR 'health care financing'/de OR 'health care utilization'/exp OR 'low cost':ab,ti OR 'high cost':ab,ti OR (healthcare NEXT/1 cost*):ab,ti OR ('health care' NEXT/1 cost*):ab,ti OR fiscal:ab,ti OR funding:ab,ti OR financial:ab,ti OR finance:ab,ti OR (cost NEXT/1 estimate*):ab,ti OR 'cost variable':ab,ti OR (unit NEXT/1 cost*):ab,ti OR economic*:ab,ti OR pharmacoeconomic*:ab,ti OR price*:ab,ti OR pricing:ab,ti OR (cost* NEAR/3 (treat* OR therap*)):ab,ti OR (healthcare NEXT/1 (utilization OR utilization)):ab,ti OR ('health care' NEXT/1 (utilization OR utilization)):ab,ti OR (resource NEXT/1 (utilization OR utilisation OR use)):ab,ti OR 'healthcare utilisation'/exp OR 'healthcare use'/exp OR 'healthcare use':ab,ti OR 'health resource consumption':ab,ti OR 'health care consumption':ab,ti OR 'medical resource consumption':ab,ti OR 'hospitalization'/exp OR hospitalization:ab,ti OR hospitalisation:ab,ti OR 'hospital admission'/exp OR 'hospital admission':ab,ti OR 'hospital admissions':ab,ti OR 'intensive care unit'/exp OR 'intensive care unit':ab,ti OR icu:ab,ti OR 'emergency department visit':ab,ti OR 'emergency department visits':ab,ti OR 'emergency room visit':ab,ti OR 'emergency room visits':ab,ti OR 'er visit':ab,ti OR 'er visits':ab,ti OR 'ed visit':ab,ti OR 'ed visits':ab,ti OR 'inpatient visit':ab,ti OR 'inpatient visits':ab,ti OR 'outpatient'/exp OR 'outpatient':ab,ti OR 'outpatients':ab,ti OR 'specialist visit':ab,ti OR 'specialist visits':ab,ti OR 'unscheduled doctor visit':ab,ti OR 'unscheduled doctor visits':ab,ti OR 'unscheduled physician visit':ab,ti OR 'unscheduled physician visits':ab,ti OR 'general practitioner visit':ab,ti OR 'general practitioner visits':ab,ti OR 'direct cost':ab,ti OR 'direct costs':ab,ti OR 'direct medical cost':ab,ti OR 'direct medical costs' OR 'medical direct cost':ab,ti OR 'medical direct costs':ab,ti OR 'direct non medical cost':ab,ti OR 'direct non medical costs':ab,ti OR 'indirect cost':ab,ti OR 'indirect costs':ab,ti OR 'total cost':ab,ti OR 'total costs':ab,ti OR 'cost per patient treated':ab,ti OR 'cost of illness':ab,ti OR 'budget impact':ab,ti OR 'cost burden':ab,ti OR 'societal cost':ab,ti OR 'societal costs':ab,ti | 1,799,312 |
| Humanistic burden | 4 | 'quality of life'/exp OR qol:ab,ti OR 'quality of life':ab,ti OR hrql:ab,ti OR hrqol:ab,ti OR 'patient reported outcome':ab,ti OR 'patient reported outcomes':ab,ti OR satisfaction:ab,ti OR preference*:ab,ti OR utility:ab,ti OR utilities:ab,ti OR disutility:ab,ti OR disutilities:ab,ti OR disability:ab,ti OR 'functional status':ab,ti OR 'physical function':ab,ti OR impairment:ab,ti OR disabilities:ab,ti OR productivity:ab,ti OR employment:ab,ti OR retirement:ab,ti OR 'work disability':ab,ti OR absenteeism:ab,ti OR presenteeism:ab,ti OR 'sick leave':ab,ti OR 'sick day':ab,ti OR sf36:ab,ti OR 'sf 36':ab,ti OR 'sf thirtysix':ab,ti OR 'sf thirty six':ab,ti OR 'short form thirty six':ab,ti OR 'short form thirtysix':ab,ti OR sf6:ab,ti OR 'sf 6':ab,ti OR 'sf six' OR sfsix:ab,ti OR 'short form six':ab,ti OR 'shortform six':ab,ti OR 'short form 6':ab,ti OR 'standard gamble':ab,ti OR 'time trade off':ab,ti OR 'time tradeoff':ab,ti OR 'visual analog scale':ab,ti OR 'visual analogue scale':ab,ti OR 'discrete choice experiment':ab,ti OR 'eq 5d':ab,ti OR eq5d:ab,ti OR euroqol:ab,ti OR 'euro qol':ab,ti OR 'health status':ab,ti OR 'st. george respiratory questionnaire'/exp OR 'st georges respiratory questionnaire' OR 'st george respiratory questionnaire' OR sgrq OR 'sgrq c' OR 'Chronic Respiratory Questionnaire'/exp OR ‘chronic respiratory questionnaire':ab,ti OR crq:ab,ti OR 'McGill Pain Questionnaire'/exp OR 'mcgill pain questionnaire':ab,ti OR mpq:ab,ti OR 'Brief Pain Inventory'/exp OR 'brief pain inventory':ab,ti OR bpi:ab,ti OR 'Sickness Impact Profile'/exp OR 'sickness impact profile':ab,ti OR 'assessment of quality of life':ab,ti OR aqol:ab,ti OR 'quality of well being scale':ab,ti OR qwb:ab,ti OR 15d:ab,ti OR 'health utilities index':ab,ti OR hui:ab,ti | 1,445,199 |
| Study designs | 5 | 'longitudinal study'/exp OR 'longitudinal study'/de OR 'longitudinal study':ab,ti OR 'retrospective study'/exp OR 'retrospective study'/de OR 'retrospective study':ab,ti OR 'prospective study'/exp OR 'prospective study'/de OR 'prospective study':ab,ti OR 'cohort analysis'/exp OR 'cohort analysis'/de OR cohort*:ab,ti OR (('follow up' OR followup) NEXT/1 (study OR studies)):ab,ti OR 'cross-sectional study'/exp OR 'cross-sectional study'/de OR 'cross-sectional study':ab,ti OR 'cross sectional study'/exp OR 'cross sectional study'/de OR 'cross sectional study':ab,ti OR 'cohort study'/exp OR 'cohort study'/de OR 'cohort study':ab,ti OR 'followup study':ab,ti OR 'observational study'/exp OR 'observational study'/de OR 'observational study':ab,ti OR 'registry':ab,ti OR 'registries':ab,ti OR 'real world':ab,ti | 1,879,509 |
| Study designs not of interest (to be filtered out) | 6 | 'randomized controlled trials'/exp OR 'randomized controlled trials'/de | 107,192 |
| Non-human studies (to be filtered out) | 7 | [animals]/lim OR [animal cell]/lim OR [animal experiment]/lim OR [animal model]/lim OR [animal tissue]/lim NOT [humans]/lim | 5,046,705 |
| Publication types not of interest (to be filtered out) | 8 | [conference review]/lim OR [editorial]/lim OR [letter]/lim OR [note]/lim OR [short survey]/lim OR [controlled clinical trial]/lim OR [randomized controlled trial]/lim OR [clinical trial number]/lim | 3,336,635 |
| Combined search for economic burden studies | 9 | #1 AND #2 AND #3 AND #5 NOT (#6 OR #7 OR #8) AND [2006-2016]/py | 1540 |
| Combined search for humanistic burden studies | 10 | #1 AND #2 AND #4 AND #5 NOT (#6 OR #7 OR #8) AND [2000-2016]/py | 1190 |
| **Total combined search** | **11** | **#9 OR #10** | **2342** |

**Supplementary Table 2** Search strategy for Medline In-Process via the PubMed interface

| **Description** | **#** | **Search string** | **Results** |
| --- | --- | --- | --- |
| Disease | 1 | "chronic obstructive lung disease"[Title/Abstract] OR emphysema*[Title/Abstract] OR "chronic bronchitis"[Title/Abstract] OR "obstructive pulmonary"[Title/Abstract] OR "obstructive lung"[Title/Abstract] OR "obstructive airway"[Title/Abstract] OR "obstructive airflow"[Title/Abstract] OR "obstructive bronchitis"[Title/Abstract] OR "obstructive respiratory"[Title/Abstract] OR copd[Title/Abstract] OR coad[Title/Abstract] OR cobd[Title/Abstract] OR aecb[Title/Abstract] | 80,558 |
| Disease severity | 2 | moderate*[Title/Abstract] OR severe*[Title/Abstract] OR "frequent exacerbation"[Title/Abstract] OR "frequent exacerbations"[Title/Abstract] OR "frequent hospitalisation"[Title/Abstract] OR "frequent hospitalisations"[Title/Abstract] OR "frequent hospitalization"[Title/Abstract] OR "frequent hospitalizations"[Title/Abstract] OR "fev1 50 79%"[Title/Abstract] OR "fev1 50% 79%"[Title/Abstract] OR "fev1 30 49%"[Title/Abstract] OR "fev1 30% 49%"[Title/Abstract] OR "fev1 30"[Title/Abstract] OR "fev1 30%"[Title/Abstract] OR "frequent exacerbators"[Title/Abstract] OR "patients hospitalized for an exacerbation"[Title/Abstract] OR "patients with a history of exacerbations"[Title/Abstract] OR "patients with two or more exacerbations"[Title/Abstract] OR "patients with 2 or more exacerbations"[Title/Abstract] OR "patients with 2 exacerbations"[Title/Abstract] OR "patients who experienced two or more exacerbations"[Title/Abstract] OR "patients who experienced 2 or more exacerbations"[Title/Abstract] OR "patients who experienced 2 exacerbations"[Title/Abstract] | 1,153,927 |
| Economic burden | 3 | economic*[Title/Abstract] OR "economic aspect"[Title/Abstract] OR cost[Title/Abstract] OR costs{Title/Abstract] OR socioeconomics[Title/Abstract] OR "health economics"[Title/Abstract] OR pharmacoeconomic*[Title/Abstract] OR fee[Title/Abstract] OR budget[Title/Abstract] OR "hospital finance"[Title/Abstract] OR "financial management"[Title/Abstract] OR "health care financing"[Title/Abstract] OR "health care utilization"[Title/Abstract] OR "health care utilisation"[Title/Abstract] OR "healthcare utilization"[Title/Abstract] OR "healthcare utilisation"[Title/Abstract] OR fiscal[Title/Abstract] OR funding[Title/Abstract] OR financial[Title/Abstract] OR finance[Title/Abstract] OR OR price*[Title/Abstract] OR pricing[Title/Abstract] OR "resource use"[Title/Abstract] OR "resource utilization"[Title/Abstract] OR "resource utilisation"[Title/Abstract] OR "healthcare use"[Title/Abstract] OR "health care use"[Title/Abstract] OR "health resource consumption"[Title/Abstract] OR "health care consumption"[Title/Abstract] OR "medical resource consumption"[Title/Abstract] OR hospitalization[Title/Abstract] OR hospitalisation[Title/Abstract] OR "hospital admission"[Title/Abstract] OR "intensive care unit"[Title/Abstract] OR icu[Title/Abstract] OR "emergency department visit"[Title/Abstract] OR "emergency department visits"[Title/Abstract] OR "emergency room visit"[Title/Abstract] OR "emergency room visits"[Title/Abstract] OR "er visit"[Title/Abstract] OR "er visits"[Title/Abstract] OR "ed visit"[Title/Abstract] OR "ed visits"[Title/Abstract] OR "inpatient visit"[Title/Abstract] OR "inpatient visits"[Title/Abstract] OR "outpatient"[Title/Abstract] OR "outpatients"[Title/Abstract] OR "specialist visit"[Title/Abstract] OR "specialist visits"[Title/Abstract] OR "unscheduled doctor visit"[Title/Abstract] OR "unscheduled doctor visits"[Title/Abstract] OR "unscheduled physician visit"[Title/Abstract] OR "unscheduled physician visits"[Title/Abstract] OR "general practitioner visit"[Title/Abstract] OR "general practitioner visits"[Title/Abstract] | 2,799,248 |
| Humanistic burden | 4 | "quality of life"[Title/Abstract] OR qol[Title/Abstract] OR hrql[Title/Abstract] OR hrqol[Title/Abstract] OR "patient reported outcome"[Title/Abstract] OR "patient reported outcomes"[Title/Abstract] OR satisfaction[Title/Abstract] OR preference*[Title/Abstract] OR utility[Title/Abstract] OR utilities[Title/Abstract] OR disutility[Title/Abstract] OR disutilities[Title/Abstract] OR disability[Title/Abstract] OR "functional status"[Title/Abstract] OR "physical function"[Title/Abstract] OR impairment[Title/Abstract] OR disabilities[Title/Abstract] OR productivity[Title/Abstract] OR employment[Title/Abstract] OR retirement[Title/Abstract] OR "work disability"[Title/Abstract] OR absenteeism[Title/Abstract] OR presenteeism[Title/Abstract] OR "sick leave"[Title/Abstract] OR "sick day"[Title/Abstract] OR sf36[Title/Abstract] OR "sf 36"[Title/Abstract] OR "sf thirtysix"[Title/Abstract] OR "sf thirty six"[Title/Abstract] OR "short form thirty six"[Title/Abstract] OR "short form thirtysix"[Title/Abstract] OR sf6[Title/Abstract] OR "sf 6"[Title/Abstract] OR "sf six"[Title/Abstract] OR sfsix[Title/Abstract] OR "short form six"[Title/Abstract] OR "shortform six"[Title/Abstract] OR "short form 6"[Title/Abstract] OR "standard gamble"[Title/Abstract] OR "time trade off"[Title/Abstract] OR "time tradeoff"[Title/Abstract] OR "visual analog scale"[Title/Abstract] OR "visual analogue scale"[Title/Abstract] OR "discrete choice experiment"[Title/Abstract] OR "eq 5d"[Title/Abstract] OR eq5d[Title/Abstract] OR euroqol[Title/Abstract] OR "euro qol"[Title/Abstract] OR "health status"[Title/Abstract] OR "st. george respiratory questionnaire"[Title/Abstract] OR "st. geogrges respiratory questionnaire"[Title/Abstract] OR "st georges respiratory questionnaire"[Title/Abstract] OR "st george respiratory questionnaire"[Title/Abstract] OR sgrq[Title/Abstract] OR "sgrq c"[Title/Abstract] OR "chronic respiratory questionnaire"[Title/Abstract] OR crq[Title/Abstract] OR "mcgill pain questionnaire"[Title/Abstract] OR mpq[Title/Abstract] OR "brief pain inventory"[Title/Abstract] OR bpi[Title/Abstract] OR "sickness impact profile"[Title/Abstract] OR "assessment of quality of life"[Title/Abstract] OR aqol[Title/Abstract] OR "quality of well being scale"[Title/Abstract] OR qwb[Title/Abstract] OR 15d[Title/Abstract] OR "health utilities index"[Title/Abstract] OR hui[Title/Abstract] | 1,020,995 |
| Study designs | 5 | "longitudinal study"[Title/Abstract] OR "retrospective study"[Title/Abstract] OR "prospective study"[Title/Abstract] OR "cohort analysis"[Title/Abstract] OR cohort*[Title/Abstract] OR "follow up study"[Title/Abstract] OR "follow up studies"[Title/Abstract] OR "followup study"[Title/Abstract] OR "followup studies"[Title/Abstract] OR "cross-sectional study"[Title/Abstract] OR "cohort study"[Title/Abstract] OR "cohort study"[Title/Abstract] OR "observational study"[Title/Abstract] OR "registry"[Title/Abstract] OR "registries"[Title/Abstract] OR "real world"[Title/Abstract] | 863,548 |
| **Combined search with in-process limit** | **6** | **#1 AND #2 AND (#3 OR #4) AND #5 AND inprocess[SB]** | **67** |

**Supplementary Table 3** PICOS-T criteria for study selection

| **Category** | **Selection criteria** |
| --- | --- |
| **Population** | Inclusion criteria  Adult patients (or caregivers to adult patients) meeting any of the below criteria:   - Moderate-to-very severe COPDa - COPD with frequent exacerbations (ie ≥2 exacerbations in the previous year that required treatment with oral/systemic corticosteroids and/or antibiotics) - COPD and an exacerbation event that resulted in hospitalization (eg inpatient management for ≥24 hours) or death within the previous year |
| Exclusion criteria  Publications that did not report data specific to adults with moderate-to-very severe COPD, COPD with frequent exacerbations or a COPD exacerbation that resulted in hospitalization or death |
| **Interventions** | **Any intervention/no intervention** |
| **Comparators** | **No restriction based on treatment comparisons reported/NR** |
| **Outcomes** | Inclusion criteria  Economic burden-related outcomes, including but not limited to:   - HRU   - Hospitalization   - ED visits   - Specialist visits   - Unscheduled physician visits   - Oral corticosteroid and antibiotic use (for non-viral exacerbations)   - Drivers/predictors of resource utilization - Direct costs - Total treatment costs - Costs per exacerbation - Costs per hospitalization - HRU - Indirect costs - Productivity - Absenteeism and presenteeism - Caregiver costs and time - Out-of-pocket expenses - Drivers/predictors of costs |
| **Study designb** | Inclusion criteria  Observational studies (including prospective and retrospective cohort studies, cross-sectional studies and chart reviews) |
| Exclusion criteria   - Animal studies - *In vitro*/*ex vivo* studies - Gene expression/protein expression studies - Case studies/case series - Clinical trials   Any publications that are not study related (eg reviews, editorials, etc.) were also excluded |
| **Language** | English-language articles only |
| **Geographical regionsc** | Limited to studies conducted in Australia, Canada, France, Germany, Italy, Japan, Spain, the UK and the US |
| **Publication date** | Limited to items published between January 1, 2006 and November 14, 2016 |

**Notes:** aDefined as: post-bronchodilator FEV1/FVC of <0.70, plus 50%≤FEV1<80% predicted (for moderate), 30%≤FEV1<50% predicted (for severe) or FEV1<30% (for very severe); being in accordance with current or previous GOLD guidelines; or being in accordance with any other measure/instrument investigators used to describe moderate or severe disease. bThe bibliographies of accepted SLRs were examined for additional, relevant references. cGeographical limitations were applied to economic studies as reported here.

**Abbreviations:** COPD, chronic obstructive pulmonary disease; ED, emergency department; FEV1, forced expiratory volume in 1 s; FVC, forced vital capacity; GOLD, Global Initiative for Chronic Obstructive Lung Disease; HRU, healthcare resource utilization; NR, not reported; PICOS-T, population, interventions, comparators, outcomes, study design and time period; PRISMA, Preferred Reporting Items for Systematic Reviews and Meta-Analyses; SLR, systematic literature review; UK, United Kingdom; US, United States.

**Supplementary Table 4** HRU findings (n=66 studies)

| **Author, year Country, setting** | **Study design [length of follow-up/time period available for HRU data],  sample size** | **Definition of COPD severity/exacerbations** | **HRU** | **Statistical comparisons of HRU across subgroups** |
| --- | --- | --- | --- | --- |
| **AbuDagga, 20131**  Country: US Setting: Inpatient and outpatient | **Retrospective cohort [1 year]**  N=17,382 patients with ≥1 ED, ≥1 hospitalization or ≥2 physician office visits for CB during follow-up period  By exacerbation frequency:  CB patients with ≥2 exacerbations during their baseline year (the year before index date): N=1392 | **COPD severity:** NR  **Exacerbation:**   - A moderate exacerbation was identified by either an ED visit with a primary COPD diagnosis or a fill of an OCS within 7 days of the date of a physician office visit with a diagnosis of COPD - A severe exacerbation was identified by a hospital admission with a primary diagnosis of COPD | **Annual number of severe exacerbations per patient, mean (SD):**   - Overall sample: 0.4 (0.8) - Among the subgroup of patients with ≥2 exacerbations during their baseline year: 0.8 (1.3) | NR |
| **Abusaid, 20092**  Country: US Setting: Inpatient | **Retrospective cohort [2 years]**  N=139 COPD patients hospitalized because of an exacerbation  By the presence of DD:   - DD: N=84 - No DD: N=55 | **COPD severity:** FEV1<80% predicted  **Exacerbation:** An acute deterioration in baseline dyspnea, cough or sputum beyond usual day-to-day variations | **Number of exacerbations requiring hospitalizations during 2-year follow-up period:**   - DD: 214 - No DD: 74   **Rate (PPPY) of exacerbations requiring hospitalizations during follow-up period,** **mean**:   - DD: 1.28 - No DD: 0.67   **Length of hospital stay (days) for admissions during the 2-year follow-up period, mean (SD):**   - DD: 4.02 (1.8) - No DD: 3.24 (1.20) | **Number of exacerbations requiring hospitalizations during 2-year follow-up period:**   - DD vs No DD: *p*=0.0067   **Rate (PPPY) of exacerbations requiring hospitalizations during follow-up period:**   - DD vs No DD: *p*=0.0067   **Length of hospital stay (days) for admissions during the 2-year follow-up period**   - DD vs No DD: *p*=0.005 |
| **Benzo, 20163**  Country: US Setting: Outpatient | **Cross-sectional [HRU data was obtained for the 12 months preceding study entry]**  N=310 COPD patients | **COPD severity:** Moderate-to-very severe COPD (FEV1<80% predicted)  **Exacerbation:** NR | - Hospitalization in last 12 months (unclear whether these events were related specifically to COPD): 37% - ED visit in last 12 months (unclear whether these events were related specifically to COPD): 40% - Use of oxygen therapy (assumed to be at baseline): 38% | NR |
| **Blasi, 20144** Country: Italy Setting: Inpatient and outpatient | **Retrospective [29 months]**  N=15,857 COPD patients with severe exacerbation  (Classified according to number and type of E-COPD that occurred over a 3-year period before the index event) Severe E-COPD at enrollment to the study:   - ≥1 severe E-COPD: n=5625 - ≥1 moderate E-COPD: n=8436 - 0 E-COPD: n=1796 | **COPD severity:** NR  **Exacerbation:** E-COPD was an event leading to either the use of antibiotics or corticosteroids in the management of acute worsening of COPD symptoms (moderate) or hospitalization (severe) | **Number (%) of patients hospitalized for a new severe E-COPD event during follow-up period by E-COPD history:**   - All: 6878 (43) - ≥1 severe E-COPD: 3648 (65) - ≥1 moderate E-COPD: 2823 (34) - 0 E-COPD: 407 (23)   **Annual rate PPPY of new severe E-COPD (defined as requiring hospitalization) during follow-up period by E-COPD history (95% CI):**   - All: 0.5 (0.51–0.53) - ≥1 severe E-COPD: 0.9 (0.91–0.97) - ≥1 moderate E-COPD: 0.3 (0.30–0.32) - 0 E-COPD: 0.2 (0.17–0.20) | **Number of patients hospitalized for a new severe E-COPD event during follow-up period by E-COPD history:**   - ≥1 moderate vs ≥1 severe E-COPD: *p*<0.05 - 0 vs ≥1 moderate E-COPD: *p*<0.05 |
| **Bu, 20115**  Country: Australia Setting: Community | **Prospective cohort [2 years]**  N=56 moderate-to-very severe COPD patients  Patients by disease severity:   - Stage 2: N=19 - Stage 3: N=23 - Stage 4: N=14   By BODE scoring:   - Patients with worsening BODE scoring: N=33 - Patients with stable/improving BODE scoring: N=23 - Patients with worsening BODE and decline in FEV1% predicted: N=13 - Patients with worsening BODE and no change in FEV1% predicted: N=20 | **COPD severity:** Moderate-to-very severe COPD (GOLD criteria [2006]):   - Stage 2: 50%≤FEV1<80% predicted - Stage 3: 30%≤FEV1<50% predicted - Stage 4: FEV1<30% predicted or FEV1 <50% predicted plus chronic respiratory failure (PaO2 60 mmHg with or without PaCO2 >50 mmHg while breathing air at sea level)   **Exacerbation:** AECOPD was defined by the Anthonisen criteria (2003) | **HRU due to AECOPD per patient over 2 years, median (IQR):**   - Number of hospital presentations: 1 (0–4) - Number of ED presentations: 0 (0–0.75) - Number of inpatient admissions: 1 (0–3.75) - Total number of bed-days: 5 (0–15)   **HRU due to AECOPD per patient over 2 years by BODE scores, median (IQR):**  Number of hospital presentations:   - Patients with worsening BODE: 2 (0–6) - Patients with stable/improved BODE: 1 (0–1)   Number of bed-days:   - Patients with worsening BODE: 10 (0–22) - Patients with stable/improved BODE: 3 (0–7) | **HRU due to AECOPD per patient over 2 years, by BODE score:**  Hospital presentations:   - Patients with worsening BODE vs stable/improved BODE: *p*=0.011   Total number of bed-days:   - Patients with worsening BODE vs stable/improved BODE: *p*=0.021 |
| **Bustamante-Fermosel, 20076**  Country: Spain Setting: Inpatient | **Retrospective study [1 year]**  N=763 COPD patients with 972 acute exacerbations leading to hospital admissions in 2004 | **COPD severity:** Mild-to-very severe (GOLD criteria [2005]; stage definition NR)  **Exacerbation**: Anthonisen clinical criteria as follows:   - Type 1: increased dyspnea, sputum volume and purulence - Type 2: 2 “type 1” symptoms present - Type 3: 1 “type 1” symptom present and at least 1 of the following: upper respiratory tract infection; fever without other cause; increased wheezing; increased cough; or a 20% increase in either respiratory or heart rate relative to baseline | **HRU data for acute COPD exacerbations in 2004, mean (SD):**   - Number of hospital admissions per patient: 1.78 (2.38) - Length of hospital stay: 10.59 (8.18) days   **HRU data for acute COPD exacerbations in 2004, %:**   - Proportion of patients who needed ventilator support in ICU: 96 - Home oxygen therapy: 50.8 - Admission to ICU for index exacerbation: 5.0 - Previously admitted to ICU: 4.8 | NR |
| **Carrasco Garrido, 20067** Country: Spain Setting: Primary care  *Publications linked by named source: de Miguel-Diez, 20108* | **Cross-sectional study [HRU data provided for 12-month period]**  N=10,711 COPD patients  Results for N=9963 patients by the following SEPAR severity subgroups were also reported:   - Mild: N=3634 - Moderate: N=5471 - Severe: N=1146 | **COPD severity:** SEPAR criteria (FEV1<80% predicted):   - Mild: FEV1 60–80% of the reference value - Moderate: FEV1 40–59% of the reference value - Severe: FEV1<40% of the reference value   **Exacerbation**: NR | **HRU data 12 months prior to study entry per patient, mean (SD) [range]:**   - Visits to ED: 1.4 (1.9) [0–12] [also reported in text as mean 1.60 (SD: 2.71)] - Hospital admissions: 0.5 (0.9) [0–11] [also reported in text as mean 0.50 (SD: 1.17)] - Visits to primary care physician: 6.66 (5.71) - Visits to pneumologist: 1.43 (1.52)   **HRU data 12 months prior to study entry, n/N (%):** Use of oxygen therapy: 1351/10,007 (13.5) | NR |
| **Chen, 20099** Country: Canada Setting: Inpatient (acute care hospitals) | **Retrospective cohort [1 year]**  N=108,726 COPD patients  By age, years:   - 40–49: N=3770 - 50–59: N=10,567 - 60–69: N=24,510 - 70–79: N=40,844 - ≥80: N=29,035   By sex:   - Men: N=59,291 - Women: N=49,435   By Charlson Index:   - 0: N=49,330 - 1: N=30,125 - ≥2: N=29,271   By length of hospital stay:   - <6 days: N=49,784 - ≥6 days: N=58,942 | **COPD severity:** NR  **Exacerbation:** NR (all patients were hospitalized for an exacerbation at enrollment to the study) | **Length of hospital stay (days), median (range):** 6 (NR)  **Number of patients readmitted to hospital for COPD within 1 year:** 38,955  **Incidence rate for COPD readmission, %:** 49.1 per year | NR |
| **Collins, 201210** Country: US Setting: Outpatient | **Prospective cohort [median 4.8 years]**  N=90 COPD patients [all patients were males aged over 55 years] | **COPD severity:** Patients’ self-reported moderate-to-severe COPD (no details provided)  **Exacerbation:** NR | **Patients on home oxygen therapy at baseline, n/N (%):** 30/90 (33) | NR |
| **Dalal, 2010a11**  Country: US Setting: Inpatient and ED  *Publications linked by named data source: Lindenauer, 2006;12 Silver, 2010;13 Xu, 201214* | **Retrospective cohort [HRU data was obtained for 60 days of index admission and the preceding year]**  N=NR (data are reported in terms of N=85,789 healthcare episodes related to exacerbations in 2008):   - Standard inpatient admissions: 49.8% - ED visits: 28.7% - Hospital outpatient visits: 16.7% - Severe inpatient admissions: 4.8% - [No definition of “standard admission” or “severe admission” in study] | **COPD severity:** NR  **Exacerbation:** NR (data available for patients with inpatient and ED visits due to COPD exacerbation) | **Length of hospital stay (days), mean (SD):**   - Any admission: 4.8 (4.5) - Standard admission: 4.5 (3.3) - Any severe admission: 8.8 (10.1) - Severe admission, ICU admission without intubation: 6.6 (5.6) - Severe admission, ICU admission with intubation: 16.0 (16.7) - Severe admission; intubation without ICU admission: 10.9 (11.0)   **Rate of readmission within 60 days of index admission, %:**   - For any cause: 13 - For COPD: 5 | NR |
| **Dalal, 2010b15**  Country: US Setting: Inpatient and ED | **Retrospective cohort [30–60 days]**  N=NR (data were reported in terms of healthcare encounters in 2008 [N=38,323])  By type of inpatient admission:   - ED: N=10,322 - Simple admissions: N=25,560 - Complex admissions: N=2441 - [Simple admission did not involve intubation or an ICU stay, and complex admission involved an ICU stay or intubation] | **COPD severity:** NR  **Exacerbation:** NR (data available for patients with inpatient admissions and ED visits due to COPD exacerbation) | **Length of hospital stay (days), mean:**  Simple inpatient admissions in stated years:   - 2005: 4.9 - 2006: 4.8 - 2007: 4.7 - 2008: 4.7 (SD: 3.4; SD NR for previous years)   All complex admissions:   - 2008: 9.1 (SD: 9.2) - Other years: NR   Complex admissions requiring intubation without ICU admission in stated years:   - 2005: 10.1 - 2006: 11.0 - 2007: 11.2 - 2008: 11.1 (SD: 11.3; SD NR for previous years)   Complex admissions requiring ICU admission without intubation in stated years:   - 2005: 7.5 - 2006: 7.5 - 2007: 6.6 - 2008: 7.1 (SD: 6.0; SD NR for previous years)   Complex inpatient admissions requiring ICU admission with intubation in stated years:   - 2005: 16.2 - 2006: 16.3 - 2007: 14.4 - 2008: 16.3 (SD: 13.7; SD NR for previous years) | NR |
| **Dalal, 201516** Country: US Setting: Hospital (claims database)  *Publications linked by sample: Patel, 201317* | **Retrospective cohort [3 years]**  N=61,750 with ≥1 hospitalization, 1 ED visit or 2 outpatient visits related to COPD in 2007  By exacerbation frequency:   - Frequent: N=3852 - Infrequent: N=8416 - Non-exacerbator: N=49,482   [The frequent cohort included patients who had ≥2 exacerbations; the infrequent cohort included patients who had 1 exacerbation during the index year (2008)] | **COPD severity:** NR  **Exacerbation:** COPD-related exacerbation was defined as the following:  (a) hospitalization with a primary discharge diagnosis of COPD (severe exacerbation);  (b) ED visit with a primary diagnosis of COPD (moderate exacerbation); or  (c) COPD-related physician visit with a primary diagnosis of COPD and receipt of a prescription OCS or antibiotics within 5 days of the visit (moderate exacerbation)  Any of these episodes occurring within 14 days of each other were counted as 1 exacerbation; therefore, requiring ≥14 days between episodes to count as separate exacerbations | **Proportion of patients using home oxygen therapy in 2008, n (%):**   - Frequent: 1564 (41) - Infrequent: 2405 (29) - Non-exacerbator: 8299 (17)   **Proportion of patients with an ICU stay in 2008, n (%):**   - Frequent: 144 (4) - Infrequent: 140 (2) - Non-exacerbator: 0 (0)   **30-day all-cause readmission rate, %:**  2008:   - Frequent: 4.7 - Infrequent: 1.4 - Non-exacerbator: 0   2009:   - Frequent: 4.7 - Infrequent: 4.4 - Non-exacerbator: NR   2010:   - Frequent: 4.8 - Infrequent: 3.3 - Non-exacerbator: NR   **Proportion of patients** **with exacerbations that required the stated resource use, % (mean [SD]) PPPY:**  Severe, [ie required hospitalizations]:  *2008:*   - Frequent: 26.4 (0.33 [0.6]) - Infrequent: 13.2 (0.13 [0.3]) - Non-exacerbator: NA   *2009*:   - Frequent: 14.5 (0.18 [0.5]) - Infrequent: 6.9 (0.08 [0.3]) - Non-exacerbator: 2.3 (0.02 [0.2])   *2010:*   - Frequent: 15.1 (0.19 [0.5]) - Infrequent: 7.8 (0.09 [0.3]) - Non-exacerbator: 2.6 (0.03 [0.2])   ED visit:  *2008:*   - Frequent: 28.7 (0.40 [0.8]) - Infrequent: 16.1 (0.16 [0.4]) - Non-exacerbator: NA   *2009:*   - Frequent: 14.2 (0.20 [0.6]) - Infrequent: 7.6 (0.09 [0.3]) - Non-exacerbator: 2.7 (0.03 [0.2])   *2010:*   - Frequent: 14.6 (0.21 [0.6]) - Infrequent: 8.1 (0.10 [0.4]) - Non-exacerbator: 3.4 (0.04 [0.2])   Physician visit with receipt of prescription:  *2008:*   - Frequent: 87.8 (1.90 [1.2]) - Infrequent: 70.7 (0.71 [0.5]) - Non-exacerbator: NA   *2009:*   - Frequent: 50.2 (0.95 [1.3]) - Infrequent: 29.1 (0.42 [0.8]) - Non-exacerbator: 9.5 (0.12 [0.4])   *2010:*   - Frequent: 45.5 (0.84 [1.2]) - Infrequent: 26.9 (0.40 [0.8]) - Non-exacerbator: 10.0 (0.13 [0.4]) | NR |
| **de Miguel-Diez, 20108**  Country: Spain  Setting: Primary care  *Publications linked by named source: Carrasco Garrido, 20067* | **Retrospective study [1 year]**  N=9390 COPD patients:   - Without heart disease: N=7620 - With heart disease: N=1770 | **COPD severity:** SEPAR criteria (FEV1<80% predicted):   - Mild: FEV1 60–80% of the reference value - Moderate: FEV1 40–59% of the reference value - Severe: FEV1<40% of the reference value   **Exacerbation:** The impairment of the patient’s clinical status characterized by increased expectoration, the presence of purulence in the sputum, increase of baseline dyspnea or any combination of these symptoms | **HRU data 12 months prior to study entry per patient, with and without heart disease, mean (SD):**  Number of visits to primary care doctor:   - Without heart disease: 6.48 (5.51) - With heart disease: 7.75 (6.59)   Number of visits to pneumology clinics:   - Without heart disease: 1.36 (1.40) - With heart disease: 1.79 (2.01)   Number of visits to ED:   - Without heart disease: 1.83 (0.83) - With heart disease: 2.10 (0.94)   Number of hospital admissions:   - Without heart disease: 0.40 (1.10) - With heart disease: 0.90 (1.50)   Length of hospital stay (days):   - Without heart disease: 6.09 (10.32) - With heart disease: 11.82 (14.99) | **Differences in HRU between patients with and without heart disease 12 months prior to study entry:**   - Number of visits to primary care doctor: *p*<0.05 - Number of visits to pneumology clinics: *p*<0.05 - Number of visits to ED: *p*<0.05 - Number of hospital admissions: *p*<0.05 - Length of hospital stay: *p*<0.05 |
| **Dhamane, 201618**  Country: US Setting: Community (population based)  *Publications linked by sample: Dhamane, 201519* | **Cross-sectional [HRU data was collected for the 6 months prior to index]**  N=2497 COPD patients  By COPD severity:   - Mild: N=1384 - Moderate: N=938 - Severe: N=175 | **COPD severity:** Presence of COPD was ascertained based on responses by survey respondents, who also self-reported perceived level of severity of their COPD using a 3-point scale (mild, moderate and severe)  **Exacerbation:** NR | **Estimated number of events per patient in the past 6 months, mean:**  Traditional healthcare provider visits for any cause:   - Mild: 5.76 - Moderate: 6.64 - Severe: 6.71   ED visits for any cause:   - Mild: 0.18 - Moderate: 0.33 - Severe: 0.51   Hospitalizations for any cause:   - Mild: 0.10 - Moderate: 0.17 - Severe: 0.29   Number of COPD-related events: NR | **Trend in estimated mean number of events with increased disease severity** (mild vs moderate vs severe COPD:   - Healthcare professional visits: *p*<0.01 - ED visits: *p*<0.001 - Hospitalizations: *p*<0.001 |
| **Dushianthan, 201020** Country: UK Setting: ICU | **Retrospective cohort [NR; data collected during ICU stay for exacerbation of COPD, mean 6.8 days]**  N=64 | **COPD severity:** Severe COPD (specific definition of severe disease NR), exacerbation and acute respiratory failure with acidosis  **Exacerbation:** NR (but all patients were admitted to ICU for exacerbation of COPD) | **Length of ICU stay (days):** 6.8  **Proportion of patients managed by, n (%):**   - Intensive ventilation: 25 (39.1) - NIV as initial treatment: 42 (65.6) - Managed with controlled oxygen: 7 (10.9) | NR |
| **DuVall, 201521** Country: US Setting: Inpatient | **Retrospective cohort [30 and 60 days]**  N=89,502 patients who had an index hospitalization for COPD | **COPD severity:** NR  **Exacerbation:** NR (patients hospitalized due to COPD) | - Readmission within 30 days of first COPD hospitalization: 17.3% - Readmission within 60 days of first COPD hospitalization: 26.7% - COPD-related 30 days readmission: 7.8% | NR |
| **Escarrabill, 201522**  Country: Spain Setting: Inpatient | **Retrospective study [90 days]**  N=910 patients admitted to hospital for acute exacerbation of COPD | **COPD severity:** Assessed based on FEV1 predicted (<80%), with BODE cut-off points used to define categories as follows:   - Mild: FEV1 % predicted between 65% and 80% - Moderate: FEV1 % predicted between 50% and 64% - Severe and very severe: FEV1 % predicted ≤49%   **Exacerbation:** NR (all patients admitted to hospital for an acute exacerbation of COPD) | **Number of HRU at baseline/entry to the study due to index hospital admission, median (IQR):**   - Length of home oxygen use, in months: 24 (10–48) - Hospital admission in previous 12 months for COPD: 2 (1–3)   **Patients with HRU at baseline/ entry to the study due to index hospital admission, n or (%):**   - Home oxygen therapy at hospital admission: 30 - Home oxygen use for >15 days: (6%) - Clinical follow-up (prior to admission) by general practitioner: 30 - Clinical follow-up (prior to admission) by hospital pulmonologist: 45 - Clinical follow-up (prior to admission) by outpatient pulmonologist: 7 - Admission in previous 12 months for COPD: 50 [95% CI 46.7–53.3]   **HRU for the index hospital admission:**   - Patients treated with NIV: 9.6% - Length of hospital stay (days): - Mean: 8.3 (SD: 7.7) - Median: 7 (IQR: 4–10) - Patients with following lengths of stay, %: - Longer than 8 days: 33.4 - Between 5 and 8 days: 37.4 - Less than 5 days: 29.2   **Proportion of patients with hospital readmissions during follow-up from hospital index admission by time point, %:**   - At 30 days: 25 - At 90 days: 49 (74% due to respiratory causes) | NR |
| **Esteban, 201623**  Country: Spain Setting: Outpatient | **Prospective study [2 years]**  N=543 COPD patients  By clusters of COPD severity as identified at baseline:   - Mild COPD (cluster A): N=164 - Moderate COPD (cluster B): N=195 - Severe COPD (cluster C): N=89 - Systemic COPD (cluster D): N=95 | **COPD severity:** FEV1<80% predicted with the following clusters identified:   - Cluster A “Mild COPD”: younger age; less dyspnea; higher diffusing capacity of the carbon monoxide, muscle strength, exercise capacity and level of physical activity; better HRQoL - Cluster B “Moderate COPD”: characteristics between those in subtypes A and C) - Cluster C “Severe COPD”: heaviest smoking history; highest dyspnea scores; poorest pulmonary function and HRQoL; and lowest levels of muscle strength, exercise capacity and physical activity; but similar Charlson Comorbidity scores to those in subtype A - Cluster D “Systemic COPD”: similar respiratory impairment to those in subtype B, but also more overall comorbidities, a higher rate of hospitalization in the year before and lower levels of exercise capacity and physical activity   **Exacerbation:** NR | **Patients hospitalized in 1-year period by clusters of COPD severity identified at baseline, n (%):**   - Mild COPD (Cluster A): 16 (9.8) - Moderate COPD (Cluster B): 35 (17.9) - Severe COPD (Cluster C): 33 (37.1) - Systemic COPD (Cluster D): 35 (36.8) | **Differences in 1-year hospitalizations between clusters of patients based on COPD severity identified at baseline:** *p*<0.001 |
| **Gadre, 201424**  Country: US Setting: Inpatient | **Retrospective cohort [NR]**  N=677 patients admitted to hospital for acute respiratory failure requiring mechanical ventilation:   - COPD-related admission: N=73 - Other reasons for admission: N=604 | **COPD severity:** Patients with diagnosis of severe COPD (based on clinical history and chronic hypercapnia/hypoxia)  **Exacerbation:** NR (all patients admitted to hospital for acute respiratory failure requiring mechanical ventilation) | **Mean rate of readmission for COPD:** 30.13% over the “study period” [but duration of follow-up not clear from study report] | NR |
| **Gallego, 201625**  Country: Spain Setting: Outpatient | **Prospective cohort [1 year]**  N=118 severe-to-very severe COPD patients with 380 episodes of acute infectious exacerbations | **COPD severity:** FEV1<50% (GOLD criteria [2013]) and ≥3 exacerbations in the previous year  **Exacerbation:** Episodes that required an unscheduled visit to the unit and met more than 2 Anthonisen’s criteria. Exacerbations were considered severe if hospital was required | **Proportion of patients receiving LTOT at baseline, n (%):** 50 (42.4)  **HRU for exacerbations in 1-year study period, n (%):**   - Community managed: 227 (60) - Hospital admitted: 153 (40) | NR |
| **Garcia-Aymerich, 200426**  Country: Spain Setting: Inpatient and ED | **Cross-sectional study [NA]**  N=346 COPD patients  Of the above sample, data for N=327 were reported for the following subgroups based on energy expenditure in physical activity:   - Low (0–53 kcal per day; range between “no activity” and “walking 15 mins per day"): N=111 - Moderate (54–210 kcal per day): N=101 - High (210 kcal per day; “walking 60 mins per day” or equivalent): N=115 | **COPD severity:** NR (patients were described as having severe COPD; although this was not further defined, mean FEV1 % predicted was 35% (SD: 16)  **Exacerbation:** Patient reported an increase in dyspnea, sputum production or sputum purulence (study included all patients hospitalized or remaining in the ED for at least 18 hrs for a COPD exacerbation) | **Number of prior COPD hospital admissions, mean (SD) at baseline:** 1.6 (2.0)  **HRU at baseline, by level of energy expenditure in physical activity, n (%):**  Low energy expenditure:   - LTOT: 51 (46) - Time using LTOT: - <1 month: 4 (8) - 1–5.9 months: 5 (10) - 6 months–1.9 years: 13 (25) - 2–3.9 years: 13 (25) - ≥4 years: 16 (31) - ≥3 visits per year to control the disease: 44 (43)   Moderate energy expenditure:   - LTOT: 30 (30) - Time using LTOT: - <1 month: 5 (17) - 1–5.9 months: 4 (14) - 6 months–1.9 years: 3 (10) - 2–3.9 years: 3 (10) - ≥4 years: 14 (48) - ≥3 visits per year to control the disease: 30 (32)   High energy expenditure:   - Time using LTOT: - <1 month: 3 (11) - 1–5.9 months: 3 (11) - 6 months–1.9 years: 7 (26) - 2–3.9 years: 6 (22) - ≥4 years: 8 (30) - ≥3 visits per year to control the disease: 36 (33) | **Differences in HRU between groups based on energy expenditure in physical activity:**   - LTOT: *p*=0.001 - Time using LTOT: *p*=0.436 - ≥3 visits per year to control the disease: *p*=0.167 |
| **Garcia-Aymerich, 201127**  Country: US Setting: Community (population based) | **Retrospective cohort [10 person-years]**  N=20,571 participants  By COPD severity:   - Normal: N=7329 - Restricted: N=3169 - GOLD 0: N=4454 - GOLD 1: N=2696 - GOLD 2: N=2264 - GOLD 3 or 4: N=596 | **COPD severity:** COPD defined according to modified GOLD criteria as follows:   - Normal: no disease - Restricted: FEV1/FVC≥0.70 and FEV1<80% predicted - GOLD 0: presence of respiratory symptoms in the absence of any lung function abnormality - GOLD 1: FEV1/FVC<0.70 and FEV1≥80% - GOLD 2: FEV1/FVC<0.70 and 50%≤FEV1<80% predicted - GOLD 3 or 4: FEV1/FVC<0.70 and FEV1<50% predicted   **Exacerbation:** NR | **Number of patients with ≥1 COPD-related hospital admission by severity subgroup, n (%):**   - Normal: 132 (9) - Restricted: 202 (13) - GOLD 0: 191 (12) - GOLD 1: 287 (19) - GOLD 2: 444 (29) - GOLD 3 or 4: 281 (18)   **Median (IQR) rate of admission for all hospitalized patients:** 0.20/year (0.10–0.44) | NR |
| **Gavazzi, 201528**  Country: Italy Setting: Outpatient | **Prospective cohort study [mean follow-up of 6 (SD: 4) months]**  N=267 patients with advanced heart failure or COPD:   - COPD patients: N=93 - Advanced heart failure patients: N=174 | **COPD severity:** NR (likely to be very severe as all patients had to have FEV1<30%, or hypoxemia [PaO2<55 mmHg], or hypercapnia [PaCO2>45 mmHg, ie above the upper threshold of normal], or to be on LTOT for >8 hrs/day).  **Exacerbation:** NR | **At baseline:** Mean number of days spent in hospital within previous 12 months: 48 (SD: 35)  **At follow-up (mean 6 months [SD: 4]):**  Rate of hospital admission: 0.87  **At follow-up (mean 6 months [SD: 4]):** Length of hospital stay (days), median (IQR): 27 (49) | NR |
| **Huang, 201429**  Country: US Setting: Inpatient | **Retrospective cohort [mean 2 years]**  N=756 patients with severe COPD and on LTOT who were hospitalized for an exacerbation | **COPD severity:** NR (but all patients were on LTOT)  **Exacerbation:** NR (patients hospitalized due to COPD exacerbations) | **All-cause rehospitalization rate:** 128.6 per 100 patient-years | NR |
| **Keilty, 201330**  Country: UK Setting: Inpatient | **Prospective cohort [1 year]**  N=119 patients admitted for acute exacerbation of COPD and NIV | **COPD severity:** NR  **Exacerbation:** All patients were hospitalized for an acute exacerbation of COPD requiring NIV | **Time point: 1 year:**   - Median (range) 1-year readmission rate per patient: 1 (1–9) - Proportion of patients requiring readmission with NIV in 1 year, % (n/N): 32 (33/102)   **Time point: 1 year:**   - Length of index hospital stay (days), median (range): 9 (1–48) - Length of readmission hospital stays (days), median (range): 13 (1–111) | NR |
| **Koleva, 200731**  Country: Italy  Setting: Outpatient | **Prospective cohort [1 year]**  N=268 COPD patients  By COPD severity:   - Mild (stage 1): N=56 - Moderate (stage 2): N=90 - Severe (stage 3): N=52 - Very severe (stage 4): N=70 | **COPD severity:** Mild-to-very severe COPD classified according to 2006 GOLD criteria:   - Mild: FEV1/FVC<70% and FEV1≥80% predicted - Moderate: FEV1/FVC<70% and 50%≤FEV1<80% predicted - Severe: FEV1/FVC<70% and 30%≤FEV1<50% predicted - Very severe: FEV1/FVC<70% and FEV1<30% predicted, or clinical signs of either respiratory or cardiac failure   **Exacerbation:** Defined according to the GOLD guidelines (no further details reported) | **Annual HRU consumption for COPD PPPY during 12-month follow-up period, mean (95% CI):**  Mild:   - Hospital admissions: 0.1 (0.0–0.2) - Day-hospital days: 0.04 (0.0–0.1)   Moderate:   - Hospital admissions: 0.3 (0.2–0.5) - Day-hospital days: 0.2 (0.1–0.3)   Severe:   - Hospital admissions: 0.4 (0.3–0.8) - Day-hospital days: 0.2 (0.1–0.4)   Very severe:   - Hospital admissions: 0.8 (0.6–1.1) - Day-hospital days: 0.1 (0.0–0.2)   **LTOT PPPY during 12-month follow-up period, n (%):**   - Mild: 1 (1.8) - Moderate: 12 (13.3) - Severe: 11 (21.2) - Very severe: 44 (62.9) | **Statistical comparisons of HRU during the 12-month follow-up period between COPD severity subgroups:**   - Hospital admissions: *p*<0.001 - Day-hospital days: *p*=0.145 - LTOT: *p*<0.001 |
| **Lindenauer, 200612**  Country: US Setting: Inpatient  *Publications linked by named data source: Dalal, 2010;11 Silver, 2010;13 Xu, 201214* | **Retrospective cohort [30 days]**  N=69,820 patients hospitalized for acute exacerbation of COPD | **COPD severity:** NR  **Exacerbation:** NR (patients hospitalized due to acute exacerbation of COPD) | - Proportion of patients treated with non-invasive positive-pressure ventilation during index admission: 2.6% - Readmission rate for COPD at 14 days, mean: 3.4% - Readmission rate for any cause at 14 days, mean: 11.1% - Readmission rate for COPD at 30 days, mean: 5.1% - Readmission rate for any cause at 30 days, mean: 17.2%   **Length of stay (days), median (IQR):** 4 (3–7)  **Length of stay (days), mean (SD):** 5.3 (NR) | NR |
| **Lusuardi, 200832**  Country: Italy  Setting: Inpatient and outpatient | **Prospective cohort study [6 months]**  N=570 patients with moderate-to-very severe COPD:   - Moderate (stage 2): N=226 (39%) - Severe (stage 3): N=174 (31%) - Very severe (stage 4): N=170 (30%) | **COPD severity:** Moderate-to-very severe COPD according to GOLD classification (2004; stage definition NR)  **Exacerbation:** An increase in dyspnea, sputum production or sputum purulence | **Proportion of patients with hospital admission for COPD exacerbation during 6-month follow-up, %:**  Overall:   - 22 (124/570)   By COPD severity subgroups:   - Moderate: 14 (31/226) - Severe: 18 (32/174) - Very severe: 36 (61/170)   By drug therapy:   - Patients with LTOT: 32 - Patients without LTOT: 15   **Length of hospital stay during 6-month follow-up (days), mean (median):** 11.7 (10) | **Comparisons between groups on hospital admission during follow-up:**  By COPD severity:   - Very severe vs moderate: RR 2.6 (95% CI 1.8–3.8) - Very severe vs severe: RR 2.0 (95% CI 1.3–2.8) - Severe vs moderate: RR 1.3 (95% CI 0.85–2.1)   By drug therapy:   - With vs without LTOT: *p*=0.00001   **Comparisons between groups on length of hospital stay:**   - GOLD severity subgroups: *p*=0.35 |
| **Mahmud, 201533**  Country: US Setting: Inpatient | **Retrospective cohort [30 days]**  N=2,723,541 patients hospitalized for acute exacerbations of COPD:   - Patients with reflux esophagitis: N=9064 - Patients with GERD alone: N=335,760 - Patients without any reflux disease: 2,378,717 | **COPD severity:** NR  **Exacerbation:** NR (patients hospitalized due to acute exacerbations of COPD) | **Length of hospital stay (days), mean (SD)**: 6.29 (6.63) | Mean length of stay longer for patients with reflux esophagitis vs those with GERD alone (*p*<0.0001) and vs those without reflux disease (*p*<0.0001) |
| **Mapel, 201134**  Country: US Setting: Inpatient | **Retrospective cohort [1 year]**  N=51,072 COPD patients  By type of healthcare cover:  Commercial cohort (N=42,565) patients by complexity of illness (surrogate for disease severity):   - Low: N=19,154 - Moderate: N=14,290 - High: N=9121   Medicare cohort (N=8507) patients by complexity of illness (surrogate for disease severity):   - Low: N=3110 - Moderate: N=3047 - High: N=2350 | **COPD severity:** COPD severity was assessed by means of a novel algorithm, in which comorbid respiratory conditions and medical procedures at any time during the study period were used to stratify patients according to 3 disease complexity levels (high, moderate or low) based on selected diagnostic, procedures and services codes  **Exacerbation:** A patient with a primary diagnosis recorded by a medical provider and coded in claims or a medication for an oral antibiotic commonly used for respiratory infection, or systemic steroid received by a patient during any 14-day period. Exacerbation severity was classified by site of care reflecting resource utilization | **Mean number of office consultations/visits per patient during 1-year study period, by disease complexity:**  Commercial:   - Low: 9.41 - Moderate: 11.52 - High: 15.06   Medicare:   - Low: 10.3 - Moderate: 10.9 - High: 13.9   **Mean number of outpatient respiratory therapy services per patient during 1-year study period, by disease complexity:**  Commercial:   - Low: 0.16 - Moderate: 0.69 - High: 1.00   Medicare:   - Low: 0.1 - Moderate: 1.3 - High: 1.4   **Mean number of hospitalized exacerbations per patient during 1-year study period, by type of health plan:**   - Commercial: 0.17 - Medicare: 0.25 | NR |
| **Martin, 200835**  Country: Spain Setting: Primary care centers and hospital outpatient clinics | **Cross-sectional study [HRU data provided for a 12-month period]**  N=9405 COPD patients  By SEPAR criteria for disease severity (for N=9049 patients):   - Mild: N=3062 - Moderate: N=4464 - Severe: N=1523 | **COPD severity:** Based on SEPAR criteria (FEV1<80% predicted) as follows:   - Mild: FEV1 60–80% - Moderate: FEV1 40–59% - Severe: FEV1<40%   **Exacerbation:** NR | **HRU per patient in previous 12 months, by disease severity, mean:**  Primary care visits:   - Mild: 3.2 - Moderate: 4.6 - Severe: 5.8 - (Figures for mild and moderate appear to have accidentally reversed in study report)   ED visits:   - Mild: 0.9 - Moderate: 1.6 - Severe: 2.5   **Length of hospital stay (days) in previous 12 months, by disease severity, mean:**   - Mild: 8.8 - Moderate: 10.9 - Severe: 16.7   **HRU data in previous 12 months at baseline/entry to the study by disease severity subgroups, n (%):**  Mild:   - Oxygen therapy: 47 (1.5)   Moderate:   - Oxygen therapy: 305 (6.8)   Severe:   - Oxygen therapy: 434 (28.5) | **Differences in HRU in previous 12 months prior to study entry between COPD severity subgroups:**   - Primary care visits: *p*<0.001 - ED visits: *p*<0.001 - Length of hospital stay: *p*<0.001 - Oxygen therapy: *p*=0.001 |
| **Matkovic, 201236**  Country: Spain  Setting: Inpatient | **Prospective cohort [1 month]**  N=155 COPD patients | **COPD severity:** NR(all patients had GOLD [2010] criteria as FEV1/FVC<0.7; with a mean FEV1 of 42.4% [SD: 15.5%] predicted, with 76% of patients in GOLD stage 3 or 4)  **Exacerbation:** Diagnosis of COPD exacerbation was made by the treating physician (no further information provided) (all patients were admitted to hospital for an exacerbation of COPD) | **HRU data in 1 month after discharge from hospital, n (%):**   - Hospital assistance for COPD-related symptoms: 24 (16) - Emergency visit without admission: 7/24 (5) - Readmission: 17 (11)   **HRU data for index hospitalization for COPD exacerbations, n (%):**   - Admission to ICU: 16 (10) - Mechanically ventilated: 33 (21) - Prolonged hospitalization (>11 days): 32 (21)   **HRU data for index hospitalization for COPD exacerbations, mean (SD):** Duration of hospitalization (days): 8.8 (5.5) | NR |
| **McGhan, 200737**  Country: US Setting: Inpatient | **Retrospective cohort [follow-up ≤6 years]**  N=51,353 patients hospitalized for an exacerbation | **COPD severity:** NR  **Exacerbation:** A change in symptoms that required a change in management. Severe exacerbations were defined as requiring admission to the hospital | **Patients rehospitalized for COPD with following frequency during follow-up period (≥1 year and <6 years), n (%):**   - 0 rehospitalizations: 33,239 (64.73) - 1 rehospitalization: 9439 (18.38) - 2 rehospitalizations: 3877 (7.55) - 3 rehospitalizations: 1877 (3.66) - >3 rehospitalizations: 2921 (5.69)   **Length o**f **hospital stay (days) for readmissions after discharge from index admission:**   - Mean (SD): 6.48 (6.56) - Median (IQR): 5.0 (3.0–7.6) | NR |
| **Merinopoulou, 201638**  Country: UK Setting: Primary and secondary care  *Publications linked by named data source: Mullerova, 2014;39 Punekar, 2013a;40 Punekar, 2013b;41 Punekar, 2013c;42 Punekar, 2015;43 Punekar, 201444*  *Publications linked by sample: Merinopoulou, 201545* | **Retrospective database [accrual years: January 1, 2011–December 31, 2013]**  N=44,201 patients with COPD  By GOLD A–D:   - A: N=12,493 - B: N=7752 - C: N=6689 - D: N=9980   2011, total PYs at risk (by GOLD A–D):   - A: 11,893.16 - B: 7195.80 - C: 6275.49 - D: 9183.12   2012, total PYs at risk (by GOLD A–D):   - A: 10,877.59 - B: 6224.29 - C: 5659.35 - D: 7796.55   2013, total PYs at risk (by GOLD A–D):   - A: 8957.15 - B: 4888.70 - C: 4580.30 - D: 5945.35 | **COPD severity:** Patients stratified by severity of COPD based on GOLD 2013 A–D:   - A: low risk, low symptoms - B: low risk, more symptoms - C: high risk, low symptoms - D: high risk, more symptoms   **Exacerbation:** Acute worsening of symptoms | **Rate of admissions per PY (95% CI):**  COPD-related hospitalizations (by GOLD A–D):  *2011:*   - A: 0.22 (0.20–0.25) - B: 0.48 (0.46–0.51) - C: 0.36 (0.33–0.40) - D: 0.79 (0.75–0.84)   *2012:*   - A: 0.29 (0.25–0.33) - B: 0.53 (0.50–0.56) - C: 0.39 (0.36–0.42) - D: 0.88 (0.83–0.94)   *2013:*   - A: 0.35 (0.31–0.40) - B: 0.57 (0.54–0.61) - C: 0.44 (0.40–0.48) - D: 0.85 (0.81–0.89)   Non-COPD hospitalizations (by GOLD A–D):  *2011:*   - A: 0.39 (0.38–0.40) - B: 0.45 (0.43–0.46) - C: 0.36 (0.34–0.37) - D: 0.49 (0.48–0.50)   *2012:*   - A: 0.44 (0.43–0.45) - B: 0.43 (0.42–0.45) - C: 0.38 (0.36–0.39) - D: 0.40 (0.38–0.41)   *2013:*   - A: 0.39 (0.37–0.40) - B: 0.42 (0.41–0.44) - C: 0.32 (0.30–0.34) - D: 0.28 (0.27–0.30)   GP visits:  *2011:*   - A: 4.82 (4.74–4.93) - B: 5.91 (5.78–6.07) - C: 6.30 (6.16–6.47) - D: 7.44 (7.31–7.61)   *2012:*   - A: 4.82 (4.73–4.93) - B: 5.66 (5.52–5.83) - C: 6.29 (6.14–6.48) - D: 7.16 (7.03–7.34)   *2013:*   - A: 4.72 (4.62–4.84) - B: 5.71 (5.54–5.89) - C: 6.09 (5.93–6.28) - D: 6.91 (6.75–7.10) | - The 2011 rates of GP visits were found to increase with disease severity ranging from 4.82 (95% CI 4.74–4.93) GP visits per PY in GOLD A to 7.44 (95% CI 7.31–7.61) in GOLD D - COPD-related admissions for the overall follow-up were higher among patients with more symptoms (GOLD B: 0.52; GOLD D: 0.84) compared to patients with fewer symptoms (GOLD A: 0.28; GOLD C: 0.39) - No clear pattern was observed in annual non-COPD hospitalization rates among patients with GOLD A, B, C and D severity |
| **Miravitlles, 200646**  Country: Spain Setting: Outpatient | **Cross-sectional study [HRU data provided for 12-month period]**  N=1057 COPD patients  By number of exacerbations in the previous year:   - <3: N=757 - ≥3: N=300 | **COPD severity:** FEV1<70% predicted  **Exacerbation:** Episodes of aggravation of respiratory symptoms requiring ambulatory treatment with antibiotics, oral corticosteroids or both and which were documented in clinical records | **Percentage of HRU in previous year prior to study enrollment by exacerbation frequency:**  All patients:   - Patients hospitalized: 33.5 - Use of oxygen therapy: 17.5   <3 exacerbations:   - Patients hospitalized: 22.1 - Use of oxygen therapy: 12.7   ≥3 exacerbations:   - Patients hospitalized: 60.7 - Use of oxygen therapy: 28.9   **Visits to ED in previous year prior to study enrollment by exacerbation frequency, mean (SD):**   - All patients: 1 (1.9) - <3 exacerbations: 0.5 (1.1) - ≥3 exacerbations: 2.4 (2.7) | **Differences in HRU in year prior to study enrollment between groups of patients by exacerbation frequency:**   - Patients hospitalized: *p*<0.0001 - Visits to ED: *p*<0.0001 - Use of oxygen therapy: *p*<0.0001 |
| **Mittmann, 200847** Country: Canada Setting: Primary care  *Publications linked by sample: FitzGerald, 200748* | **Prospective cohort [1 year]**  N=609 COPD patients (with 790 episodes of exacerbations over the study period):   - Moderate exacerbations: n=639 (80.9%) - Severe exacerbations: n=151 (19.1%)   By acute exacerbation frequency:   - Exacerbators: N=278   - 1: n=119   - 2: n=70   - ≥3: n=89 - Non-exacerbators: n=246 - Patients with severe exacerbations  (leading to hospitalization): n=75 - Study completers only: n=524 | **COPD severity:** FEV1≤65% and FEV1/FVC≤71% (equivalent to moderate-to-very severe disease as defined by GOLD criteria)  **Exacerbation:** Exacerbation was defined as a complex of COPD-related symptoms, including 1 or more of the following: cough, wheeze, dyspnea or sputum production lasting ≥3 days   - Moderate exacerbation was defined as visit to an outpatient facility, including an ED (but not requiring admission to hospital) and an alteration in medication (for example, addition of antibiotics or oral corticosteroids - Severe exacerbation was defined as one requiring hospitalization | **HRU per exacerbation, n (%):**   - Outpatient visits: 618 (78.2) - ED visits: 245 (31.0) - Hospitalization: 151 (19.1)   **HRU over 1 year for patients who completed the study:**   - Rate of ED visits per patient: 0.37 - Rate of hospitalization per patient: 0.21 - Proportion of patients who saw a family physician, n (%): 366 (69.8) - Proportion of patients who saw a specialist, n (%): 158 (30.2) - Number of patients prescribed professional home care, n (%): 17 (3.2)   **HRU over 1 year among hospitalized patients (due to COPD exacerbation):**  Length of hospital stay (days):   - Mean (SD): 13.2 (19.2) - Median (range): 8 (2–130)   Proportion of patients by HRU, n (%):   - Admission to ICU: 14 (18.7) - Oxygen: 57 (76.0)   **HRU over 1 year among exacerbators (≥1 during study period):** Rate of hospitalizations per patient: 0.27  **Proportion of patients by HRU:**   - Contacted healthcare professional, n (%): 255 (91.7) - ED visit, n (%): 111 (39.9) - Hospitalization, n (%) [95% CI]: 75 (27.0) [24.3–29.6]; and by number of hospitalizations:   - 1: 50 (18.0) [15.7–20.3]   - 2: 19 (6.8) [5.3–8.3]   - ≥3: 6 (2.2) [1.3–3.0]   **HRU per exacerbation by type of exacerbation, n (%):**  Moderate exacerbation:   - Outpatient visits: 574 (89.8)   - GP visit: 85.9%   - Respirologist: 13.1%   - Emergency physician: 3.3%   - Other healthcare professionals: 1% - ED visits: 105 (16.4) - Hospitalization: NA   Severe exacerbation:   - Outpatient visits: 44 (29.1)   - Visit to a GP: 38.6%   - Visit to ED physician: 34.1% - Visit to respirologist: 22.7% - Visit to another physician: 11.4% - ED visits: 140 (92.7)   - Use of the ED prior to hospitalization: 92.7%   - Length of hospital stay due to an exacerbation (days), mean (SD): 10.0 (14.5)   - Management in an ICU: 16%   - Length of ICU stay (days), mean (SD): 6.2 (6.5) - Hospitalization: 151 (100) | NR |
| **Molinari, 201549** Country: France Setting: Hospitals (public and private) | **Retrospective cohort [accrual years between 2007 and 2012]**  N=12,751 COPD patients  By hospital admission year:   - 2010: N=4136 - 2011: N=4155 - 2012: N=4460   By hospitalization severity and hospital admission year:  Mild:   - 2010: N=2636 - 2011: N=2548 - 2012: N=2642   Moderate:   - 2010: N=823 - 2011: N=981 - 2012: N=1062   Severe:   - 2010: N=211 - 2011: N=241 - 2012: N=276   Very severe:   - 2010: N=466 - 2011: N=385 - 2012: N=480 | **COPD severity:** NR  **Exacerbation:** All patients were hospitalized for an exacerbation at the time of enrollment to the study, with hospitalization event classified as mild-to-very severe according to the following definitions:   - Mild: general ward admission without respiratory failure - Moderate: general ward admission with acute respiratory distress - Severe: ICU admission without mechanical ventilation - Very severe: ICU with mechanical ventilation | **Length of hospital stays (days), median (IQR) [as reported in study]:**  By hospital admission year:   - 2010: 8 (8) - 2011: 8 (8) - 2012: 8 (8)   By hospitalization severity and hospital admission year:  *Mild hospitalization:*   - 2010: 7 (8) - 2011: 8 (7) - 2012: 7 (7)   *Moderate hospitalization:*   - 2010: 9 (9) - 2011: 9 (7.5) - 2012: 9 (8)   *Severe hospitalization:*   - 2010: 9 (9) - 2011: 10 (9) - 2012: 10 (8.5)   *Very severe hospitalization:*   - 2010: 13 (14) - 2011: 14 (15) - 2012: 14 (16)   **Proportion of patients requiring oxygen supplementation during hospitalization:** 28.1% | **Comparison of length of hospital stay between different hospital severity subgroups by hospital admission year:**   - 2010: *p*<0.01 - 2011: *p*<0.01 - 2012: *p*<0.01 |
| **Mullerova, 201439**  Country: UK Setting: Primary care  *Publications linked by named source: Merinopoulou, 2016;38 Punekar, 2013a;40 Punekar, 2013b;41 Punekar, 2013c;42 Punekar, 2015;43 Punekar, 201444* | **Retrospective cohort [mean 2.5 (SD: 1.6) years]**  N=52,237 patients with COPD  Proportion of patients in severity subgroups, %:  GOLD 2011:   - A: 37 - B: 18 - C: 19 - D: 26   GOLD 2013:   - A: 35 - B: 16 - C: 21 - D: 28 | **COPD severity:** GOLD 2011/2013 criteria (specific stage definitions NR)  **Exacerbation**: NR | **COPD hospitalizations during study follow-up, per 100-PYs (by GOLD A–D):**   - A: 12 - B: NR - C: 24 - D: 33 | NR |
| **Nantsupawat, 201250**  Country: US Setting: Inpatient | **Retrospective cohort [30 days follow-up, mean 16 days]**  N=81 COPD patients hospitalized for an exacerbation. Data are reported per admissions N=103  Among N=36 patients with pulmonary function tests within the previous 5 years, by COPD severity:   - Mild: N=1 - Moderate: N=8 - Severe: N=29 - Very severe: N=12 | **COPD severity:** GOLD severity categories:   - Mild: FEV1>80% - Moderate: 50%≤FEV1<80% predicted - Severe: 30%≤FEV1<50% predicted - Very severe: FEV1<30% predicted or FEV1<50%   **Exacerbation:** NR | **Early rehospitalizations per total COPD exacerbation admissions, n (%):** 14 (13.59)  Proportion of COPD severity subgroups among index admissions with early rehospitalization (N=10) vs those without early rehospitalization (N=40), n (%):   - Mild: 0 (0) vs 1 (2.5) - Moderate: 1 (10) vs 7 (17.5) - Severe: 7 (70) vs 22 (55.0) - Very severe: 2 (20) vs 10 (25.0) | No significant difference in COPD severity between the patients with and without early rehospitalization (*p*=0.833) |
| **Nguyen, 201451**  Country: US Setting: Inpatient | **Retrospective cohort [30 days]**  N=4871 COPD patients hospitalized for an exacerbation | **COPD severity:** NR  **Exacerbation:** NR (patients hospitalized due to COPD exacerbations) | **30-day readmission rate:** 18%  (60% of readmissions occurred within first 15 days of discharge) | NR |
| **Nishi, 201552**  Country: US Setting: Inpatient and outpatient | **Retrospective cohort [1-year follow-up, data collected for 10 patients from separate calendar years 2001–2010]**  N=329,482 COPD patients with ≥2 outpatient visits or acute hospitalization for either COPD as primary diagnosis or secondary diagnosis | **COPD severity:** NR  **Exacerbation:** NR (patients hospitalized due to COPD exacerbations or outpatient at least twice) | **Sustained oxygen use, n (%):** 73,659 (22.4) | NR |
| **Pasquale, 201253**  Country: US Setting: Inpatient and outpatient | **Retrospective cohort [2 years]**  N=8554 COPD patients  By exacerbation frequency:   - ≥1 exacerbation in Year 1 of follow-up (baseline): N=6298 - ≥2 exacerbations in Year 1 of follow-up (baseline): N=3242 | **COPD severity:** NR  **Exacerbation:**   - Severe exacerbation: COPD-related hospitalization or death within 7 days of a COPD diagnosis - Moderate exacerbation: oral or parenteral corticosteroid use on the same day or within 7 days of a COPD-related diagnosis claim | **COPD-related HRU:**  Overall COPD population mean (SD; % of patients):   - Inpatient hospitalization per patient: 1.2 (4.0; 20.6) - ED visits per patient: 0.2 (0.7; 13.9) - Physician office visits per patient: 7.9 (10.1; 75.8)   ≥1 exacerbation in Year 1 of follow-up, mean (SD; % of patients):   - Inpatient hospitalizations per patient: 1.5 (4.4; 24.2) - ED visits per patient: 0.3 (0.8; 16.7) - Physician office visits per patient: 9.4 (10.8; 80.7)   ≥2 exacerbations in Year 1 of follow-up, mean (SD; % of patients):   - Inpatient hospitalizations per patient: 2.2 (5.5; 31.0) - ED visits per patient: 0.4 (1.0; 22.0) - Physician office visits per patient: 12.4 (11.8; 89.0) | NR |
| **Philip, 201054**  Country: Australia Setting: Inpatient | **Retrospective cohort [2 years]**  N=30,179 COPD patients, with a total of 55,796 COPD-related hospital admissions (range 1–41)  (For patients with more than one admission, an index admission was selected randomly for everyone, for the purposes of data analysis) | **COPD severity:** NR  **Exacerbation:** NR (all patients were hospitalized for an exacerbation at enrollment to the study) | **HRU** **per index hospital admission during a 2-year period:**  Length of hospital stay (days), median (IQR):   - Total: 6 (3–10)   Proportion of patients with length of hospital stay of:   - 1–5 days: 48.4% - 6–15 days: 37.7% - >16 days: 13.9%   Proportion of patients admitted to ICU (for at least 1 hr): 6.2%  Proportion of patients receiving mechanical ventilation: 3%   - For ≤50 hrs: 1.63% - For >50 hrs: 1.39% | NR |
| **Pitassi, 201555**  Country: Italy Setting: Inpatient | **Retrospective cohort study [accrual years: 2010–2014]**  N=212 patients with moderate-to-severe COPD, of whom 67 patients had bronchiectasis | **COPD severity:** Moderate-to-severe COPD (GOLD 2011; stage definition NR)  **Exacerbation:** NR | **Length of hospital stay (days), mean (SD):**   - Patients with bronchiectasis: 8.22 (3.67) - Patients without bronchiectasis: 6.88 (3.43) | Patients with bronchiectasis vs without: *p*=0.01 |
| **Pretto, 201256**  Country: Australia Setting: Acute care public hospitals | **Retrospective cohort [3 months]**  N=203 patients  Total number of hospital admissions: N=221   - Metropolitan hospitals: N=103 - Rural hospitals: N=118 | **COPD severity:** NR  **Exacerbation:** NR (all patients were hospitalized for an exacerbation at enrollment to the study) | **Length of hospital stay (days):**   - Mean: 6.3 (SD: 6.1) - Median: 5 | **Differences between admissions in metropolitan vs rural hospitals by services offered:**   - Oxygen therapy during hospital admission: *p*=NS - Specialist follow-up: *p*<0.001 - GP follow-up: *p*=0.001 - Pulmonary rehabilitation referral: *p*=0.013 |
| **Punekar, 201444**  Country: UK  Setting: Primary care  *Publications linked by named data source: Punekar, 2013a;40 Punekar, 2013b;41 Punekar, 2013c;42 Punekar, 2015a;57 Punekar, 2015b43 Publications linked by sample: Punekar, 2013a;40 Punekar, 2013c42* | **Retrospective cohort [12 months]**  N=58,589 COPD patients  By COPD severity (all patients):   - GOLD stage 1: N=8844 - GOLD stage 2: N=29,832 - GOLD stage 3: N=15,497 - GOLD stage 4: N=3377   Patients with 0 moderate-to-very severe exacerbations in 1-year observation period (N=31,049):   - GOLD stage 1: N=5475 - GOLD stage 2: N=16,815 - GOLD stage 3: N=7013 - GOLD stage 4: N=1152   Patients with 1 moderate-to-very severe exacerbation in 12-month observation period (N=14,189):   - GOLD stage 1: N=1971 - GOLD stage 2: N=7324 - GOLD stage 3: N=3855 - GOLD stage 4: N=814   Patients with ≥2 moderate-to-very severe exacerbations in 1-year observation period (N=13,351):   - GOLD stage 1: N=1398 - GOLD stage 2: N=5693 - GOLD stage 3: N=4629 - GOLD stage 4: N=1411 | **COPD severity:** Mild-to-very severe COPD (GOLD 2010; stage definition NR)  **Exacerbation:** A moderate exacerbation was defined as an episode characterized by management with COPD-specific antibiotics and OCS (within 5 days of starting antibiotics) and/or a medical diagnosis of COPD exacerbation. A severe exacerbation was defined as an episode characterized by hospitalization for COPD | **HRU during the 12-month observation period, n (rate):**  Patients with 0 moderate/severe exacerbations in 12 months:   - Moderate exacerbations (requiring medication): NA - Severe exacerbations (requiring hospitalization): NA - Non-COPD hospitalization: 10,310 (0.33) - GP in-person visit: 341,138 (10.98) - GP practice nurse visit: 128,755 (4.14) - GP home visit: 6036 (0.19) - GP out-of-office visit: 2542 (0.08) - GP practice administrative contact: 786,501 (25.33) - GP practice correspondence: 22,009 (0.70)   Patients with 1 moderate/severe exacerbation in 12 months:   - Moderate exacerbations (requiring medication): 10,952 (0.77) - Severe exacerbations (requiring hospitalization): 3237 (0.23) - Non-COPD hospitalization: 7383 (0.52) - GP in-person visit: 190,325 (13.41) - GP practice nurse visit: 80,210 (5.65) - GP home visit: 5110 (0.36) - GP out-of-office visit: 2568 (0.18) - GP practice administrative contact: 423,124 (29.82) - GP practice correspondence: 13,554 (0.95)   Patients with ≥2 moderate/severe exacerbations in 12 months:   - Moderate exacerbations (requiring medication): 32,302 (2.42) - Severe exacerbations (requiring hospitalization): 5776 (0.43) - Non-COPD hospitalization: 9631 (0.72) - GP in-person visit: 212,879 (15.94) - GP practice nurse visit: 96,652 (7.23) - GP home visit: 7950 (0.59) - GP out-of-office visit: 4068 (0.30) - GP practice administrative contact: 457,316 (34.25) - GP practice correspondence: 14,187 (1.06) | **HRU during the 12-month observation period, comparisons between exacerbation-rate groups:**  Patients with 1 vs 0 moderate-to-very severe exacerbations:   - Non-COPD hospitalization: *p*<0.0001 - GP in-person visit: *p*<0.0001 - GP practice nurse visit: *p*<0.0001 - GP home visit: *p*=0.2986 - GP out-of-office visit: *p*<0.0001 - GP practice administrative contact: *p*<0.0001 - GP practice correspondence: *p*<0.0001   Patients with ≥2 vs 0 moderate-to-very severe exacerbations:   - Moderate exacerbations (requiring medication): *p*<0.0001 - Severe exacerbations (requiring hospitalization): *p*<0.0001 - Non-COPD hospitalization: *p*<0.0001 - GP in-person visit: *p*<0.0001 - GP practice nurse visit: *p*<0.0001 - GP home visit: *p*<0.0001 - GP out-of-office visit: *p*<0.0001 - GP practice administrative contact: *p*<0.0001 |
| **Punekar, 2015a58**  Country: UK Setting: Primary care   *Publications linked by named data source: Punekar, 2013a;40 Punekar, 2013b;41 Punekar, 2013c;42  Punekar, 201444 Punekar, 2015b43* | **Retrospective cohort [24 months]**  N=7881 newly diagnosed COPD patients, of whom 7661 were classified by disease severity, as follows:   - Mild: N=1475 - Moderate: N=4147 - Severe: N=1754 - Very severe: N=285 | **COPD severity:** Mild-to-very severe COPD defined according to GOLD criteria as follows:   - Mild: FEV1≥80% predicted - Moderate: 50%≤FEV1<80% predicted - Severe: 30%≤FEV1<50% predicted - Very severe: FEV1<30% predicted   **Exacerbation:** A moderate exacerbation was defined as an episode characterized by management with COPD-specific antibiotics and OCS (within 5 days of initiation of antibiotics) and/or a medical diagnosis of COPD exacerbation. A severe exacerbation was defined as an episode characterized by hospitalization for COPD | **Annual rates of resource use per patient during 24-month observation period:**  All COPD patients:   - GP surgery visits: 12.85 - GP out-of-office visits: 0.15 - GP administrative contacts: 27.99 - GP surgery correspondence: 1.24 - GP practice nurse visits: 4.92 - GP home visits: 0.26 - Moderate exacerbations: 0.51 - Severe exacerbations (hospitalization for COPD): 0.13 - Non-COPD hospitalizations: 0.47   Severity subgroups:  *GP surgery visits:*   - Mild: 12.99 - Moderate: 13.00 - Severe: 12.64 - Very severe: 12.22   *GP out-of-office visits:*   - Mild: 0.11 - Moderate: 0.15 - Severe: 0.18 - Very severe: 0.30   *GP administrative contacts:*   - Mild: 27.03 - Moderate: 27.84 - Severe: 29.02 - Very severe: 30.74   *GP surgery correspondence:*   - Mild: 1.10 - Moderate: 1.23 - Severe: 1.36 - Very severe: 1.22   *GP practice nurse visits:*   - Mild: 4.95 - Moderate: 4.94 - Severe: 4.83 - Very severe: 5.03   *GP home visits:*   - Mild: 0.21 - Moderate: 0.25 - Severe: 0.32 - Very severe: 0.38   *Moderate exacerbations:*   - Mild: 0.45 - Moderate: 0.47 - Severe: 0.60 - Very severe: 0.86   *Severe exacerbations (hospitalization for COPD):*   - Mild: 0.11 - Moderate: 0.12 - Severe: 0.14 - Very severe: 0.19   *Non-COPD hospitalizations:*   - Mild: 0.42 - Moderate: 0.48 - Severe: 0.47 - Very severe: 0.52 | NR |
| **Quintana, 201458** Country: Spain Setting: Inpatient including ED | **Prospective cohort [2 months]**  N=2332 COPD patients visiting ED for exacerbation of COPD (E-COPD), of which 1403 were admitted to hospital for the index ED event | **COPD severity:** NR  **Exacerbation:** E-COPD defined as event in the natural course of the disease characterized by a change in the patient’s baseline dyspnea, cough and/or sputum beyond the normal day-to-day variations, and that may have warranted a change in regular medication in a patient with underlying COPD. | **Previous (prior to index ED visit) LTOT or NIMV, n (%):** 748 (32.08)  **Prior hospital admission for E-COPD in previous 12 months (prior to index ED visit), n (%):**   - 0: 1365 (59.04) - 1: 493 (21.45) - ≥2: 440 (19.15)   **HRU for index ED visit:**   - Length of hospital stay (days), median (IQR): 6 (4–9) - COPD-related admission within 2 months of index ED visit, n/N (%): - For all patients with index ED visit: 430/2322 (18.44) - For patients with index ED visit resulting in hospitalization: 299/1403 (21.31) | NR |
| **Roberts, 2011a59** Country: US Setting: Inpatient  *Publications linked by sample: Short, 201360* | **Retrospective cohort [1 year]**  N=6576 COPD patients hospitalized for a severe exacerbation | **COPD severity:** NR  **Exacerbation:** NR (patients hospitalized due to COPD severe exacerbations) | **Length of hospital stay (days), mean:** 4.82 | NR |
| **Roberts, 2011b61**  Country: UK Setting: Inpatient | **Retrospective cohort [90 days]**  N=9716 patients hospitalized with an exacerbation of COPD | **COPD severity:** NR  **Exacerbation:** All patients were hospitalized for an exacerbation at enrollment to the study | - Length of hospital stay of ≥7 days: 42% - Readmission within the 90-day period, n/N (%): 2971/8677 (34) - Discharged patients accepted onto a supported (early) discharge scheme, n/N (%): 1630/8617 (19)   **Length of hospital stay (days):**   - Mean: 8.87 - Median: 5 | NR |
| **Short, 201360**  Country: UK Setting: Inpatient | **Prospective cohort [30 days]**  N=1343 patients hospitalized for an acute exacerbation of COPD | **COPD severity:** NR  **Exacerbation:** All patients were hospitalized for an acute exacerbation of COPD | **Length of hospital stay (days), median (IQR):**   - Patients had compliance with only 1 GOLD COPD treatment guideline domain: 11 (6–15) - Patients with fully compliant care: 5 (2–10) | The study compared median length of hospital stay across 2 subgroups of patients whose COPD disease management was fully or partially compliant with GOLD COPD treatment guidelines. Those whose management was fully compliant with all GOLD COPD treatment guidelines had a shorter median length of stay and the difference between groups was statistically significant (*p*<0.0001) |
| **Silver, 201013**  Country: US Setting: Inpatient  *Publications linked by named data source: Dalal, 2010;11 Lindenauer, 2006;12 Xu, 201214* | **Cross-sectional [NA]**  N=69,841 COPD patients hospitalized for exacerbations | **COPD severity:** NR  **Exacerbation:** NR (patients hospitalized due to COPD exacerbations) | **Length of hospital stay (days), mean (95% CI):** 4.9 (4.82–4.89)  **Rate of admission to ICU:** 8.8% | NR |
| **Small, 201662** Country: Japan Setting: Primary care and outpatient | **Cross-sectional [NA]**  N=420 COPD patients  By dyspnea severity (MRC score):   - Moderate-to-severe dyspnea (MRC ≥2): N=163 - Patients with no/mild dyspnea (MRC <2): N=257 | **COPD severity:** No/mild-to-severe dyspnea defined as follows:   - Moderate to severe: modified MRC score ≥2 - No/mild dyspnea: MRC <2   **Exacerbation:**   - Moderate exacerbation was costed as treatment with prednisolone 40 mg daily for 5 days and/or co-amoxiclav 875 mg/125 mg for 7 days when an antibiotic was prescribed - Definition of severe exacerbation: NR | **HRU in the past year by dyspnea severity, n (%):**  Moderate-to-severe dyspnea (MRC ≥2):   - LTOT: 46 (22.5) - Rate of specialist consultations: 9 (8.4)   Mild/no dyspnea (MRC <2):   - LTOT: 4 (1.3) - Rate of specialist consultations: 4.6 (5.9) | **HRU in the past year in COPD patients with moderate-to-severe vs no/mild dyspnea:**   - LTOT: *p*<0.0001 - Specialist consultations: *p*<0.0001 |
| **Stanford, 200663**  Country: US Setting: ED and inpatient | **Retrospective cohort [30 days]**  N=NR COPD patients with hospital encounters (includes patients admitted to ED)  (Data reported by number of encounters, N=59,735)  By type of hospital encounter:   - ED visit: N=20,431 - Standard inpatient: N=33,210 - Severe inpatient intubation/ICU: N=6094 - ICU/no intubation: N=4456 - Intubation/no ICU: N=496 - ICU + intubation: N=1142 | **COPD severity:** NR  **Exacerbation:** NR (patients hospitalized for COPD exacerbation; includes patients admitted to ED without inpatient admission) | **Inpatient readmissions within 30 days, n (%):**  Standard inpatient:   - COPD: 2245 (6.76) - All-cause: 5459 (16.44)   ICU/no intubation:   - COPD: 326 (7.32) - All-cause: 793 (17.78)   Intubation/no ICU:   - COPD: 20 (4.03) - All-cause: 69 (13.91)   ICU + intubation:   - COPD: 705 (2.12) - All-cause: 1233 (3.71)   **ED readmission within 30 days:**  Standard inpatient:   - COPD: 705 (2.12) - All-cause: 1233 (3.71)   ICU/no intubation:   - COPD: 82 (1.84) - All-cause: 137 (3.07)   ED visit:   - COPD: 1138 (5.57) - All-cause: 2547 (12.47)   Intubation/no ICU:   - COPD: 20 (4.03) - All-cause: 3 (0.60)   ICU + intubation:   - COPD: 705 (2.12) - All-cause: 1233 (3.71)   **Length of initial inpatient stay (days), mean (SD):**   - Standard inpatient: 5.08 (4.45) - ICU/no intubation: 6.39 (5.46) - Intubation/no ICU: 11.76 (10.78) - ICU + intubation: 14.82 (16.65) | NR |
| **Steer, 201564**  Country: UK Setting: Outpatient | **Prospective cohort [1 year]**  N=183 patients admitted for exacerbation of COPD  By ventilation use:   - Ventilated patients: N=82 - Non-ventilated patients: N=101 | **COPD severity:** NR  **Exacerbation:** Exacerbation was defined as an acute worsening of the patient’s condition from stable-state that was sustained and warranted additional treatment | **HRU following discharge:**  Readmitted within 12 months, %:   - Ventilated: 76.8 - Non-ventilated: 66.3   Number of readmissions, median (IQR):   - Ventilated: 2 (1–3) - Non-ventilated: 1 (0–2)   Number of respiratory readmissions, median (IQR):   - Ventilated: 1 (0–3) - Non-ventilated: 1 (0–2)   Readmission requiring assisted ventilation, %:   - Ventilated: 29.3 - Non-ventilated: 10.9   **Total length of hospital stay (days), median (IQR):**   - Ventilated: 11 (1–28) - Non-ventilated: 4 (0–18) | There was no statistically significant difference between ventilated and non-ventilated subgroups with respect to readmissions within 12 months and number of readmissions. However, the median total length of hospital stay was higher in ventilated as compared to non-ventilated patients and the difference was statistically significant (*p*<0.05)   - Readmitted within 12 months: *p*=0.14 - Number of readmissions: *p*=0.088 - Number of respiratory readmissions: *p*=0.034 - Total length of hospital stays: *p*=0.040 - Readmission requiring assisted ventilation: *p*=0.002 |
| **Stefan, 201465**  Country: US Setting: Inpatient | **Prospective cohort [NR]**  N=3520 COPD patients admitted to an ICU for severe acute exacerbations | **COPD severity:** NR  **Exacerbation:** NR (patients in an ICU for severe acute COPD exacerbations) | **Proportion of patients undergoing ventilation in ICU:**   - Non-invasive ventilation: 29.6% - Invasive ventilation: 45.5%   **Time in the hospital (days), median:** 7.2 | There was an increase in the use of non-invasive ventilation between 2008 and 2012, from 17.6% to 37.4% of patients (*p*<0.001) |
| **Stefan, 201566**  Country: US Setting: Inpatient | **Retrospective cohort [1 year]**  N=NR COPD patients hospitalized  (Data reported per number of COPD admissions N=723,560)  Number of COPD admissions in previous year:   - None: 497,223 (68.72%) - 1: 125,365 (17.33%) - 2: 48,797 (6.74%) - 3: 52,175 (7.21%) | **COPD severity:** NR  **Exacerbation:** NR (patients described as being hospitalized due to acute exacerbations of COPD) | **Proportion of admissions in which patients were ventilated:** 18.2%   - Initial non-invasive ventilation: 10.6% - Initial mechanical ventilation: 7.3% - Order of ventilation unclear: 0.4% | NR |
| **Suissa, 201267** Country: Canada Setting: NR (health insurance program) | **Retrospective cohort [17 years]**  N=73,106 COPD patients | **COPD severity:** NR  **Exacerbation:** Patients had a first-ever hospitalization for severe exacerbation of COPD at enrollment to the study. First severe COPD exacerbation was defined as patients' first hospitalization with a primary discharge diagnosis of COPD. All severe exacerbations were defined as subsequent hospitalizations with a primary discharge diagnosis of COPD, occurring during follow-up | **Mean rate of severe exacerbations requiring hospitalization per 100 patients per year:**   - Total: 37.8 - Baseline rate per 10,000 patients per day for the 1st severe exacerbation: 3 (equivalent to 11 per 100 patients per year) - Over follow-up period, per 10,000 patients per day for the 9th severe exacerbation: 50 (equivalent to 183 per 100 patients per year) | The baseline rate of severe exacerbations increases with every new severe exacerbation |
| **Thomas, 201468**  Country: UK Setting: General practice  *Publications linked by sample: Thomas, 201169* | **Retrospective cohort [3 years]** N=511 patients with COPD  By disease severity:   - Mild to moderate: N=314 - Severe: N=145 - Very severe: N=52   By exacerbation history:   - Non-exacerbators: N=97 - Infrequent exacerbators (<3 per year during the study period): N=345 - Frequent exacerbators (≥3 exacerbations per year during the study period): N=69 | **COPD severity:** Mild-to-very severe COPD defined according to the 2010 NICE guideline (mild-to-moderate: FEV1≥50% predicted; severe: FEV1 30–49%; and very severe: FEV1<30%)  **Exacerbation:** A prescription of antibiotics and/or OCS for an acute respiratory episode | **HRU among patients by COPD severity, median (IQR):**  Mild to moderate:   - Primary care COPD contacts/year: 2.33 (1.45–3.33) - Secondary care COPD visits/year: 0.00 (0.00–0.33) - COPD hospitalizations/year: 0.00 (0.00–0.00)   Severe:   - Primary care COPD contacts/year: 3.33 (2.33–5.00) - Secondary care COPD visits/year: 0.33 (0.00–1.00) - COPD hospitalizations/year: 0.00 (0.00–0.00) (as reported)   Very severe:   - Primary care COPD contacts/year: 3.67 (2.67–6.42) - Secondary care COPD visits/year: 1.00 (0.00–2.08) - COPD hospitalizations/year: 0.00 (0.00–0.33)   **HRU by exacerbation history, median (IQR):**  Non-exacerbators:   - Primary care COPD contacts/year: 1.33 (0.67–2.00) - Secondary care COPD visits/year: 0.00 (0.00–0.00) - COPD hospitalizations/year: 0.00 (0.00–0.00)   Infrequent exacerbators:   - Primary care COPD contacts/year: 2.67 (2.00–3.67) - Secondary care COPD visits/year: 0.00 (0.00–0.67) - COPD hospitalizations/year: 0.00 (0.00–0.00)   Frequent exacerbators:   - Primary care COPD contacts/year: 6.67 (5.33–8.67) - Secondary care COPD visits/year: 1.00 (0.33–2.67) - COPD hospitalizations/year: 0.00 (0.00–0.33)   **Length of hospital stay (days), median (IQR):**  By COPD severity:   - Mild to moderate: 5 (2–10) - Severe: 5 (2–9) - Very severe: 6 (3–11)   By exacerbation frequency:   - Non-exacerbators: 7 (6–8) - Infrequent exacerbators: 5.5 (3–10) - Frequent exacerbators: 5.0 (2–10) | - Patients with very severe disease had higher median number of both primary and secondary care COPD visits/year compared to severe and mild-to-moderate patients (*p*<0.001) - COPD exacerbations were associated with high HRU. The median number of COPD-related primary care contacts/year increased from 1.33 in non-exacerbators to 6.67 in frequent exacerbators (*p*<0.00001), as with secondary care visits that increased from 0.00 to 1 across the 2 groups (*p*<0.00001) - 1% of non-exacerbators, 6% of infrequent exacerbators and 21% of frequent exacerbators were hospitalized each year (*p*<0.0001) |
| **Valido, 201470**  Country: Spain Setting: NR | **Retrospective cohort [4 months]**  N=100   - Frequent exacerbators (≥2 in past year): N=61 - Non-frequent exacerbators (<2 in past year): N=39 | **COPD severity:** NR (but median FEV1 % predicted scores were equivalent to GOLD definitions of moderate-to-severe disease as follows):   - Frequent exacerbators: 44.6 (13.5) - Non-frequent exacerbators: 52.5 (44.6)   **Exacerbations**: Definition of exacerbations NR | **HRU in the last year, mean (SD):**  Frequent exacerbators (≥2):   - Admissions for COPD exacerbations: 0.5 (0.8) - Admissions to ICU for COPD exacerbations: 0.1 (0.2) - COPD exacerbations requiring NIMV: 0.2 (0.6)   Infrequent exacerbators (<2):   - Admissions for COPD exacerbations: 0.1 (0.3) - Admissions to ICU for COPD exacerbations: 0 - COPD exacerbations requiring NIMV: 0.1 (0.2) | **Differences in HRU in past year between frequent and infrequent exacerbators:**   - Admissions for COPD exacerbations:  *p*=0.006 - Admissions to ICU for COPD exacerbations: *p*=0.258 - COPD exacerbations requiring NIMV: *p*=0.170 |
| **Vallabhajosyula, 201571**  Country: US Setting: Inpatient | **Retrospective cohort [data obtained at discharge over 5 years]**  N=1145 patients treated for acute exacerbation of COPD | **COPD severity:** NR  **Exacerbation:** NR (patients treated for acute exacerbations of COPD) | - Length of stay in ICU (days), mean (SD): 1.4 (3.1) - Length of hospital stay (days), mean (SD): 5.5 (5.3)   **Proportion of patients who received ventilation:**   - Non-invasive ventilation: 38.0% - Mechanical ventilation: 17.3% | NR |
| **Vitacca, 200772**  Country: Italy Setting: Inpatient and outpatient | **Retrospective cohort study [1 year]**  N=289 patients with COPD using home mechanical ventilation  (The study also involved patients on home mechanical ventilation due to neuromuscular disease [N=375] and chest wall disease [N=128]) | **COPD severity:** NR (patients with home mechanical ventilation are assumed to have very severe COPD)  **Exacerbation:** NR | **HRU per year, mean (SD):**   - Hospitalizations: 1.37 (0.77) - Outpatient visits: 2.55 (1.73) - ED accesses: 0.74 (1.08) - Nurse home visits: 4.53 (8.7)   **Length of hospital stay PPPY (days), mean (SD):** 13.14 (9.6) | NR |
| **Vitacca, 201173** Country: Italy Setting: Outpatient | **Prospective cohort [1 year]**  N=83 very severe COPD patients  Stratified by home treatments:   - NIMV: N=30 - IMV: N=12 - Spontaneous breathing on LTOT: N=41 | **COPD severity:** Very severe COPD as defined by patients meeting ≥2 of the following criteria:   - FEV1 predicted <30% - Oxygen dependence - ≥1 hospitalization in preceding year - Left heart failure or other comorbidities - Weight loss in the last 6 months or chronic cachexia - Decreased functional status - Increasing dependence during activities of daily life - 70 years old   **Exacerbation:** NR | **Resource consumption during 12-month follow-up by home treatment received, mean (SD):**  NIMV:   - Number of admissions to hospital per month: 0.26 (0.24) - Number of admissions to ED per month: 0.12 (0.18) - Number of urgent calls to GP per month: 0.16 (0.23)   IMV:   - Number of admissions to hospital per month: 0.15 (0.16) - Number of admissions to ED per month: 0.15 (0.18) - Number of urgent calls to GP per month: 0.07 (0.12)   LTOT:   - Number of admissions to hospital per month: 0.29 (0.33) - Number of admissions to ED per month: 0.13 (0.23) - Number of urgent calls to GP per month: 0.24 (0.42) | There were no statistically significant differences in HRU between groups of patients based on home treatment received (*p*-value not reported) |
| **Wang, 200574** Country: Canada Setting: Inpatient | **Retrospective cohort [phase I/baseline data: 12 months; phase II/follow-up from hospital discharge: 2.5 years]**   - Phase I/baseline data: N=282 COPD patients - Phase II/follow-up from hospital discharge: N=54 COPD patients | **COPD severity:** Patients with moderate-to-severe COPD (FEV1<80% predicted within 12 months prior to admission)  **Exacerbation:** NR (all patients were hospitalized for acute COPD exacerbation at enrollment to the study) | **Phase I: 12-month baseline data for hospitalized patients:**  Proportion of patients, n (%):   - Discharged to long-term care facility: 13 (4.6) - Patients treated in ICU during index hospital stay: 74 (26.2)   Length of index hospital stay (days), median (range):   - All patients: 10 (1–696) - Patients who were discharged: 9 (NR) - Patients who died before discharge: 21 (NR)   Length of ICU stay (days), median (range): 6 (NR)  **Phase II: 12-month follow-up data for patients discharged from hospital:**   - Number of patients who visited ED, n (%): 37 (68.5) - Number of ED visits: 99   - Mean (SD): 1.83 (NR)   - Median (range): 1 (0–9)   - Number of COPD-related ED visits, n (%): 92 (92.9) - Total number of patients readmitted to hospital, n (%): 35 (64.8) - Total number of hospital readmissions: 92   - Mean (SD): 1.7 (NR)   - Median (range): 1 (0–7)   - Number of COPD-related hospital readmissions, n (%): 83 (90.2) | The length of hospital stay for patients who were discharged was significantly shorter than for those who died (*p*-value NR) |
| **Xu, 201214**  Country: US Setting: Inpatient  *Publications linked by named data source:  Dalal, 2010;11 Lindenauer, 2006;12 Silver, 201013* | **Retrospective cohort [NR]**  N=21,017 patients treated for acute exacerbation of COPD in hospital facilities  (data are reported by number of treated exacerbations [N=33,723]):   - Managed in the outpatient setting: 7% - Treated in the ED: 24% - Requiring hospitalization: 69% | **COPD severity:** NR  **Exacerbation:** NR (patients treated for acute exacerbations of COPD) | **Proportion of patients with LTOT:** 30%   - Proportion of exacerbations managed in the outpatient setting: 7% - Proportion of exacerbations treated in the ED: 24% - Proportion of exacerbations requiring hospitalization: 69% - Length of hospital stay (days), mean: 5.8 - Proportion of hospitalized exacerbations requiring management in an ICU: 19% - Length of stay in an ICU (days) mean: 4.7 - Proportion of inpatient admissions requiring ventilation: 19% | NR |
| **Yeo, 200675**  Country: UK Setting: General practice | **Cross-sectional [NA]**  N=27  By disease severity:   - Mild: N=10 - Moderate: N=12 - Severe: N=5 | **COPD severity:** Mild-to-very severe COPD (FEV1 % predicted <80%) defined according to BTS guidelines (1997) (mild: FEV1 60–79% predicted; moderate: FEV1 40–59% predicted; and severe: FEV1<40% predicted)  **Exacerbation**: NR | **Mean number of attendances in the previous year:**  Total primary care attendances by COPD severity subgroup:   - Mild: 15.4 - Moderate: 12.5 - Severe: 11.2   COPD-related primary care attendances by subgroup:   - Mild: 3.7 - Moderate: 3.6 - Severe: 2.8   Total secondary care attendances by severity subgroup:   - Mild: 3.7 - Moderate: 1.7 - Severe: 5.0   COPD-related secondary care attendances by subgroup:   - Mild: 0.2 - Moderate: 0.25 - Severe: 0.8   **Length of hospital stay (days), median (IQR):**  By COPD severity:   - Mild to moderate: 5 (2–10) - Severe: 5 (2–9) - Very severe: 6 (3–11)   By exacerbation frequency:   - Non-exacerbators: 7.0 (6–8) - Infrequent exacerbators: 5.5 (3–10) - Frequent exacerbators: 5.0 (2–10) | **Total primary care attendances:**   - Mild vs moderate: *p*=0.98 - Mild vs severe: *p*=0.33 - Moderate vs severe: *p*=0.24   **COPD-related primary care attendances by subgroup:**   - Mild vs moderate: *p*=0.99 - Mild vs severe: *p*=0.34 - Moderate vs severe: *p*=0.37   **Total secondary care attendances by severity subgroup:**   - Mild vs moderate: *p*=0.75 - Mild vs severe: *p*=0.54 - Moderate vs severe: *p*=0.23   **COPD-related secondary care attendances by subgroup:**   - Mild vs moderate: *p*=0.91 - Mild vs severe: *p*=0.76 - Moderate vs severe: *p*=0.55 |

**Abbreviations:** AECOPD, acute exacerbation of chronic obstructive pulmonary disease; BODE, Body mass index, airflow Obstruction, Dyspnea and Exercise capacity; BTS, British Thoracic Society; CB, chronic bronchitis; CI, confidence interval; COPD, chronic obstructive pulmonary disease; DD, diastolic dysfunction; E-COPD, exacerbation due to chronic obstructive pulmonary disease; ED, emergency department; FEV1, forced expiratory volume in 1 s; FVC, forced vital capacity; GERD, gastroesophageal reflux disease; GOLD, Global Initiative for Chronic Obstructive Lung Disease; GP, general practitioner; HRQoL, health-related quality of life; HRU, healthcare resource utilization; ICU, intensive care unit; IMV, invasive mechanical ventilation; IQR, interquartile range; LTOT, long-term oxygen therapy; MRC, Medical Research Council; NA, not applicable; NICE, National Institute of Health and Care Excellence; NIMV, non-invasive mechanical ventilation; NIV, non-invasive ventilation; NR, not reported; OCS, oral corticosteroid; PaCO2, arterial partial pressure of carbon dioxide; PaO2, arterial partial pressure of oxygen; PPPY, per patient per year; PY, person-year; RR, rate ratio; SD, standard deviation; SEPAR, Sociedad Española de Neumología y Cirugía Torácica; UK, United Kingdom; US, United States.

**Supplementary Table 5** Direct cost results (n=22 studies)

| **Author, year Country, setting Currency [cost year]** | **Study design [length of follow-up/ time period available for HRU data], sample size** | **Definition of COPD severity/exacerbations** | **Total costs per event** | **Costs per patient** |
| --- | --- | --- | --- | --- |
| **AbuDagga, 20131**  Country: US  Setting: Inpatient and outpatient  Currency [cost year]: US dollars ($) [Mid-2011] | **Retrospective cohort [1 year]**  N=17,382 COPD patients with ≥1 ED or hospitalization or ≥2 physician office visits for COPD during follow-up period  By exacerbation frequency:  Patients with ≥2 exacerbations during their baseline year: N=1392 | **COPD severity:** NR  **Exacerbation:**   - A moderate exacerbation was either an ED visit with a primary COPD diagnosis or a fill of an OCS within 7 days of the date of a physician office visit with a diagnosis of COPD - A severe exacerbation was a hospital admission with a primary diagnosis of COPD | **Cost per exacerbation ($) by severity of exacerbation, mean (SD):**   - All: $8219 ($22,644) - Moderate: $269 ($748) - Severe: $18,120 ($31,592) | **Cost PPPY for exacerbations during follow-up year, by severity of exacerbation, mean (SD):**  Patients with ≥2 exacerbations during the baseline year:   - Any exacerbation during follow-up: $13,373 ($33,307) - Moderate (all patients): $277 ($1096) - Moderate (≥1 exacerbation during follow-up): $518 ($1525) - Severe (all patients): $13,096 ($3054) - Severe (≥1 exacerbation during follow-up): $25,364 ($43,393) |
| **Blasi, 20144**  Country: Italy Setting: Inpatient and outpatientCurrency [cost year]: Euros (€) [2006] | **Retrospective [29 months]**  N=15,857  (Classified according to number and type of exacerbations of COPD (E-COPD) that occurred over a 3-year period before the index event) Severe exacerbation for COPD at enrollment to the study:   - ≥1 severe E-COPD: N=5625 - ≥1 moderate E-COPD: N=8436 - 0 E-COPD: N=1796 | **COPD severity:** NR  **Exacerbation:** E-COPD was an event leading to the use of antibiotics or corticosteroids in the management of acute worsening of COPD symptoms (moderate) or hospitalization (severe) | **Hospital costs for the index event (severe exacerbation) in 2006, mean (95% CI):** €3985 (€3913–€4054) | **Annual total costs per patient post-severe E-COPD by exacerbation history prior to severe exacerbation at enrollment to the study, mean (95% CI):**   - Overall: €6725 (€6590–€6863) - ≥1 severe E-COPD: €8779 (€8547–€9005) - ≥1 moderate E-COPD: €5999 (€5839–€6176) - 0 E-COPD: €3968 (€3697–€4283)   **Annual per-patient costs for COPD, mean:**   - Overall group: €2287 (34% of total annual costs) - ≥1 severe E-COPD: €4041 (46% of total annual costs) - ≥1 moderate E-COPD: €1467 (24% of total annual costs) - 0 E-COPD: €857 (22% of total annual costs) |
| **Dalal, 2010a11**  Country: US Setting: Inpatient and ED Currency [cost year]: US dollars ($) [2008]  *Publications linked by named data source: Lindenauer, 2006;12 Silver, 2010;13 Xu, 201214* | **Retrospective cohort [30–60 days]**  N=NR (data were reported in terms of 38,323 hospital encounters in 2008, of which there were the following types):   - ED visits: N=10,322 - Simple admissions: N=25,560   Complex admissions: N=2441 | **COPD severity:** NR  **Exacerbation:** NR (all patients with a hospital admission related to COPD as described below):   - ED visit - Simple admission: did not involve intubation or ICU   Complex admission: involved ICU or intubation | **Costs per hospital admission, by year of admission (2005–2008), mean (SD):**  ED:   - 2005: $655 (NR) - 2006: $693 (NR) - 2007: $728 (NR) - 2008: $679 ($399)   Simple inpatient:   - 2005: $7155 (NR) - 2006: $7589 (NR) - 2007: $7947 (NR) - 2008: $7544 ($8049)   Complex inpatient:   - 2005: $21,349 (NR) - 2006: $22,373 (NR) - 2007: $20,646 (NR) - 2008: $21,098 ($46,160)   **Disaggregated costs per admission for 2008, mean (SD):**  ED:   - Medical: $639 ($363) - Pharmacy: $39 ($67)   Simple inpatient:   - Medical: $6746 ($7199) - Pharmacy: $798 ($1124)   Complex inpatient:   - Medical: $18,794 ($40,797)   Pharmacy: $2304 ($6160) | NR |
| **Dalal, 2010b15**  Country: US Setting: Inpatient and ED Currency [cost year]: US dollars ($) [2008] | **Cross-sectional [60 days of index admission]**  N=NR (data are reported in terms of healthcare episodes of which there were 85,789 relating to the following types of COPD-related hospital encounters):   - ED: N=24,621 - Standard inpatient: N=42,734 - Severe inpatient: N=4142   [Of note: the study also reports on outpatient visits, which it classed as “admissions”] | **COPD severity:** NR  **Exacerbation:** NR (but data for patients with an ED or inpatient admission due to COPD exacerbation are included) | **Cost per COPD-related hospital encounter in 2008, mean (SD):**   - ED: $647 ($445) - Standard inpatient: $7242 ($7987) - Severe inpatient: $20,757 ($41,370)   **Disaggregated costs per COPD-related hospital encounter, mean (SD):**  ED:   - Medical: $606 (SD not legible) - Pharmacy: $41 ($113)   Standard inpatient:   - Medical: $6444 ($7086) - Pharmacy: 798 ($1211)   Severe inpatient:   - Medical: $18,458 ($36,423) - Pharmacy: $2299 ($5579) | NR |
| **Dalal, 201516** Country: US Setting: Inpatient Currency [cost year]: US dollars ($) [2010]  *Publications linked by sample: Patel, 201317* | **Retrospective cohort [3 years]**  N=61,750 hospitalized COPD patients  By exacerbation frequency during the index year:   - Frequent (≥2 exacerbations): n=3852 - Infrequent (1 exacerbation): n=8416 - Non-exacerbator: n=49,482 | **COPD severity:** NR  **Exacerbation:** COPD-related exacerbation was defined as a hospitalization with a primary discharge diagnosis of COPD; an ED visit with a primary diagnosis of COPD; a COPD-related physician visit with a primary diagnosis of COPD and receipt of a prescription for OCS or antibiotics within 5 days of the visit. Any of these encounters occurring within 14 days of each other were counted as 1 exacerbation, thus, requiring a gap of at least 14 days between encounters to count as separate exacerbations | NR | **All-cause cost PPPY, by year, mean (SD not provided):**  2008:   - Frequent: $22,679 - Infrequent: $17,915 - Non-exacerbator: $12,505   2009:   - Frequent: $21,594 - Infrequent: $17,404 - Non-exacerbator: $12,991   2010:   - Frequent: $20,518 - Infrequent: $16,991 - Non-exacerbator: $13,160   **Annual COPD-related costs per person, by year, mean:**  2008:   - Frequent: $7382 - Infrequent: $3916 - Non-exacerbator: $1246   2009:   - Frequent: $5765 - Infrequent: $3268 - Non-exacerbator: $1420   2010:   - Frequent: $5636 - Infrequent: $3322 - Non-exacerbator: $1465 |
| **de Miguel-Diez, 20108**  Country: Spain Setting: Primary care Currency [cost year]: Euros (€) [NR]  *Publications linked by named source: Carrasco Garrido, 20067* | **Retrospective cohort study [1 year]**  N=9390 COPD patients:   - Without heart disease: N=7620 - With heart disease: N=1770 | **COPD severity:** SEPAR criteria:   - Mild: FEV1 60–80% of the reference value - Moderate: FEV1 40–59% of the reference value - Severe: FEV1<40% of the reference value   **Exacerbation:** The impairment of the patient’s clinical status characterized by increased expectoration, the presence of purulence in the sputum, increase of baseline dyspnea or any combination of these symptoms | NR | **Annual costs per patient by subgroups with and without heart disease, mean [total costs minus sick leave]:**   - Without heart disease: €1672.64 - With heart disease: €2898.66 |
| **Foo, 201676**  Country: France Setting: Community Currency [cost year]: US dollars ($) [2013] | **Cross-sectional [NA]**  N=4343 across COPD severity and across countries (France: N=300)  By self-reported COPD severity (France) [% reported in paper]:   - Mild: N=75 (25%) - Moderate: N=171 (57%) - Severe/very severe: N=57 (19%) | **COPD severity:** Self-reporting of COPD as mild to very severe (further definition of severity NR) (Economic data not provided by COPD severity but costs associated with exacerbations across COPD severity are reported and cost per hospitalization for COPD exacerbation can be derived from reported data)  **Exacerbation:** Worsening of breathing problems that required use of antibiotics and/or systemic corticosteroids. These episodes were further categorized as moderate (community treated; costed as a general practice visit plus a course of prednisolone 40 mg once daily for 5 days and co-amoxiclav 875 mg/125 mg twice daily for 7 days, in line with global COPD guidelines); and severe (requiring an ED visit and/or hospitalization, and costed for the ED and/or inpatient stay as reported) | **Cost per hospitalization for COPD exacerbation:**  $9196 [derived from reported data on i) annual total cost per patient; ii) proportion of the total cost attributable to hospitalization for exacerbations; iii) annual mean number of hospitalizations for exacerbation per patient] | NR |
| **Foo, 201676** Country: Germany Setting: Community Currency [cost year]: US dollars ($) [2013] | **Cross-sectional [NA]**  N=4343 across COPD severity and across countries (Germany: N=300)  By self-reported COPD severity (Germany) [% reported in paper]:   - Mild: N=93 (31%) - Moderate: N=123 (41%) - Severe/very severe: N=84 (28%) | **COPD severity:** Self-reporting of COPD as being mild to very severe (further definition of severity NR) (Economic data not provided by COPD severity but costs associated with exacerbations across COPD severity are reported and cost per hospitalization for COPD exacerbation can be derived from reported data)  **Exacerbation:** Worsening of breathing problems that required use of antibiotics and/or systemic corticosteroids. These episodes were further categorized as moderate (community treated; costed as a general practice visit plus a course of prednisolone 40 mg once daily for 5 days and co-amoxiclav 875 mg/125 mg twice daily for 7 days, in line with global COPD guidelines); and severe (requiring an ED visit and/or hospitalization, and costed for the ED and/or inpatient stay as reported) | **Cost per hospitalization for COPD exacerbation:**  $11,951 [derived from reported data on i) annual total cost per patient; ii) proportion of the total cost attributable to hospitalization for exacerbations; iii) annual mean number of hospitalizations for exacerbation per patient] | NR |
| **Foo, 201676** Country: Japan Setting: Community Currency [cost year]: US dollars ($) [2013] | **Cross-sectional [NA]**  N=4343 across COPD severity and across countries (Japan: N=300)  By self-reported COPD severity (Japan) [% reported in paper]:   - Mild: N=177 - Moderate: N=84 - Severe/very severe: N=39 | **COPD severity:** Self-reported COPD severity as being mild to very severe (further definition of severity NR) (Economic data not provided by COPD severity but costs associated with exacerbations across COPD severity are reported and cost per hospitalization for COPD exacerbation can be derived from reported data)  **Exacerbation:** Worsening of breathing problems that required use of antibiotics and/or systemic corticosteroids. These episodes were further categorized as moderate (community treated; costed as a general practice visit plus a course of prednisolone 40 mg once daily for 5 days and co-amoxiclav 875 mg/125 mg twice daily for 7 days, in line with global COPD guidelines); and severe (requiring an ED visit and/or hospitalization, and costed for the ED and/or inpatient stay as reported) | **Cost per hospitalization for COPD exacerbation:**  $4185 [derived from reported data on i) annual total cost per patient; ii) proportion of the total cost attributable to hospitalization for exacerbations; iii) annual mean number of hospitalizations for exacerbation per patient] | NR |
| **Foo, 201676** Country: Italy Setting: Community Currency [cost year]: US dollars ($) [2013] | **Cross-sectional [NA]**  N=4343 across COPD severity and across countries (Italy: N=302)  By self-reported COPD severity (Italy) [% reported in paper]:   - Mild: N=78 (26%) - Moderate: N=169 (56%) - Severe/very severe: N=55 (18%) | **COPD severity:** Self-reporting of COPD as being mild to very severe (further definition of severity NR) (Economic data not provided by COPD severity but costs associated with exacerbations across COPD severity are reported and cost per hospitalization for COPD exacerbation can be derived from reported data)  **Exacerbation:** Worsening of breathing problems that required use of antibiotics and/or systemic corticosteroids. These episodes were further categorized as moderate (community treated; costed as a general practice visit plus a course of prednisolone 40 mg once daily for 5 days and co-amoxiclav 875 mg/125 mg twice daily for 7 days, in line with global COPD guidelines); and severe (requiring an ED visit and/or hospitalization, and costed for the ED and/or inpatient stay as reported) | **Cost per hospitalization for COPD exacerbation:**  $3164 [derived from reported data on i) annual total cost per patient; ii) proportion of the total cost attributable to hospitalization for exacerbations; iii) annual mean number of hospitalizations for exacerbation per patient] | NR |
| **Foo, 201676** Country: Spain Setting: Community Currency [cost year]: US dollars ($) [2013] | **Cross-sectional [NA]**  N=4343 across COPD severity and across countries (Spain: N=303)  By self-reported COPD severity (Spain) [% reported in paper]:   - Mild: N=78 (26%) - Moderate: N=169 (56%) - Severe/very severe: N=55 (18%) | **COPD severity:** Self-reporting of COPD as being mild-to-very severe (further definition of severity NR) (Economic data not provided by COPD severity but costs associated with exacerbations across COPD severity are reported and cost per hospitalization for COPD exacerbation can be derived from reported data)  **Exacerbation:** Worsening of breathing problems that required use of antibiotics and/or systemic corticosteroids. These episodes were further categorized as moderate (community treated; costed as a general practice visit plus a course of prednisolone 40 mg once daily for 5 days and co-amoxiclav 875 mg/125 mg twice daily for 7 days, in line with global COPD guidelines); and severe (requiring an ED visit and/or hospitalization, and costed for the ED and/or inpatient stay as reported) | **Cost per hospitalization for COPD exacerbation:**  $8925 [derived from reported data on i) annual total cost per patient; ii) proportion of the total cost attributable to hospitalization for exacerbations; iii) annual mean number of hospitalizations for exacerbation per patient] | NR |
| **Foo, 201676** Country: US Setting: Community  Currency [cost year]: US dollars ($) [2013] | **Cross-sectional [NA]**  N=4343 across COPD severity and across countries (US: N=1001)  By self-reported COPD severity (US) [% reported in paper]:   - Mild: 30% - Moderate: 41% - Severe/very severe: 29% | **COPD severity:** Self-reporting of COPD as being mild to very severe (further definition of severity NR)  **Exacerbation:** Worsening of breathing problems that required use of antibiotics and/or systemic corticosteroids. These episodes were further categorized as moderate (community treated; costed as a general practice visit plus a course of prednisolone 40 mg once daily for 5 days and co-amoxiclav 875 mg/125 mg twice daily for 7 days, in line with global COPD guidelines); and severe (requiring an ED visit and/or hospitalization, and costed for the ED and/or inpatient stay as reported) | **Cost per hospitalization for COPD exacerbation:**  $16,469 [derived from reported data on i) annual total cost per patient; ii) proportion of the total cost attributable to hospitalization for exacerbations; iii) annual mean number of hospitalizations for exacerbation per patient] | NR |
| **Koleva, 200731**  Country: Italy Setting: Outpatient  Currency [cost year]: Euros (€) [2004] | **Prospective cohort [1 year]**  N=268 COPD patients  By COPD severity:   - Mild (stage 1): N=56 - Moderate (stage 2): N=90 - Severe (stage 3): N=52 - Very severe (stage 4): N=70 | **COPD severity:** Patients with mild-to-very severe COPD classified according to 2006 GOLD criteria as described below:   - Mild: FEV1/FVC<70% and FEV1≥80% of predicted - Moderate: FEV1/FVC<70% and 50%≤FEV1<80% of predicted - Severe: FEV1/FVC<70% and 30%≤ FEV1<50% of predicted - Very severe: FEV1/FVC<70% and FEV1<30% of predicted, or clinical signs of either respiratory or cardiac failure   **Exacerbation:** Exacerbations were defined according to the GOLD guidelines. No further details reported | NR | **COPD costs PPPY, mean (95% CI); median:**   - All patients: €3040.2 (€2606.1–€3687.8); €1583.0 - Mild: €1046.7 (€837.4–€1364.2); €643.7 - Moderate: €2319.0 (€1876.6–€2970.1); €1468.7 - Severe COPD: €3752.1 (€2486.6–€7080.2); €1530.0 - Very severe: €5033.3 (€4136.0–€6240.1); €3293.7 |
| **Mittmann, 200847** Country: Canada Setting: Primary care Currency [cost year]: Canadian dollars ($) [2006]  *Publications linked by sample: FitzGerald, 200748* | **Prospective cohort [1 year]**  N=609 COPD patients (with 790 episodes of exacerbations over the study period):   - Moderate exacerbations: n=639 (80.9%) - Severe exacerbations:  n=151 (19.1%) | **COPD severity:** All patients had a diagnosis of stable COPD (airway obstruction with FEV1≤65% and a FEV1/FVC≤71%, equivalent to moderate-to-very severe disease as defined by GOLD criteria)  **Exacerbation:** A complex of COPD-related symptoms, including 1 or more of the following: cough, wheeze, dyspnea or sputum production lasting 3 days  Exacerbation by severity defined as the following:   - Moderate exacerbation: visit to an outpatient facility, including an ED (but not requiring admission to hospital), and an alteration in medication (eg addition of antibiotics or OCS) - Severe exacerbation: leading to hospitalization | **Total costs per exacerbation by severity and type of analysis, mean (SD):**  Moderate exacerbations:   - ITT: $641 (NR) - Clinically evaluable: $756 (NR)   Severe exacerbations:   - ITT: $9557 (NR) - Clinically evaluable: $9953 (NR)   **Annual national total costs of moderate exacerbations in Canada:**   - For 250,000 moderate exacerbations in Canada (in 1997, based on national published data): $163 million - For 354,443 moderate exacerbations in Canada in 1 year (according to RUSIC study and COPD prevalence): $227 million   **Annual national total costs of severe exacerbations:**   - For 60,000 very severe exacerbations (in 1997 according to national published data): $573 million - For 43,807 very severe exacerbations in 1 year (according to RUSIC study and COPD prevalence): $429 million   **Estimated overall cost burden for moderate-to-severe exacerbations per year:** $646 million–$736 million per year | NR |
| **Pasquale, 201253** Country: US Setting: Inpatient and outpatient Currency [cost year]: US dollars ($) [NR] | **Retrospective cohort [2 years]**  N=8554 COPD patients  By exacerbation frequency in Year 1 (0–12 months from first claim related to COPD):   - ≥1 exacerbation: n=6298 - ≥2 exacerbations: n=3242 | **COPD severity:** NR  **Exacerbation:**   - Moderate exacerbation: oral or parenteral corticosteroid use on the same day or within 7 days of a COPD-related diagnosis claim - Severe exacerbation: COPD-related hospitalization or death within 7 days of a COPD diagnosis | NR | **Unadjusted, total COPD-related costs PPPY for Year 2 (13–24 months from first claim related to COPD) by exacerbation history in Year 1 (0–12 months from first claim related to COPD), mean (SD):**   - All patients: $4069 ($8635) - ≥1 exacerbation: $4720 ($9430) - ≥2 exacerbations: $6381 ($12,092) |
| **Punekar, 201444**  Country: UK Setting: Primary care Currency [cost year]: GB pound [2011]  *Publications linked by named data source: Punekar, 2013a;40 Punekar, 2013b;41 Punekar, 2013c;42 Punekar, 2015a;57 Punekar, 2015b43*  *Publications linked by sample: Punekar, 2013a;40 Punekar, 2013c42* | **Retrospective cohort [12 months]**  N=58,589 COPD patients  By COPD severity (all patients):   - GOLD stage 1: N=8844 - GOLD stage 2: N=29,832 - GOLD stage 3: N=15,497 - GOLD stage 4: N=3377   Patients with 0 moderate-to-very severe exacerbations in 12-month observation period (N=31,049):   - GOLD stage 1: N=5475 - GOLD stage 2: N=16,815 - GOLD stage 3: N=7013 - GOLD stage 4: N=1152   Patients with 1 moderate-to-very severe exacerbation in 12-month observation period (N=14,189):   - GOLD stage 1: N=1971 - GOLD stage 2: N=7324 - GOLD stage 3: N=3855 - GOLD stage 4: N=814   Patients with ≥2 moderate-to-very severe exacerbations in 12-month observation period (N=13,351):   - GOLD stage 1: N=1398 - GOLD stage 2: N=5693 - GOLD stage 3: N=4629 - GOLD stage 4: N=1411 | **COPD severity:** Patients with mild-to-very severe COPD (GOLD, 2006 [stage definition NR])  **Exacerbation:** A moderate exacerbation was defined as an episode characterized by management with COPD-specific antibiotics and OCS (within 5 days of starting antibiotics) and/or a medical diagnosis of COPD exacerbation. A severe exacerbation was defined as an episode characterized by hospitalization for COPD | NR | **Mean COPD management costs PPPY (by GOLD stage):**  All patients:   - GOLD stage 1: £1984.06 - GOLD stage 2: £2087.00 - GOLD stage 3: £2289.88 - GOLD stage 4: £2639.17   Patients with 0 moderate-to-very severe exacerbations:   - Any COPD severity: £1523 - GOLD stage 1: £1529.29 - GOLD stage 2: £1537.25 - GOLD stage 3: £1501.92 - GOLD stage 4: £1505.83   Patients with 1 moderate-to-very severe exacerbation:   - Any COPD severity: £2405 - GOLD stage 1: £2397.18 - GOLD stage 2: £2412.22 - GOLD stage 3: £2390.06 - GOLD stage 4: £2341.71   Patients with ≥2 moderate-to-very severe exacerbations:   - Any COPD severity: £3396 - GOLD stage 1: £3199.36 - GOLD stage 2: £3308.13 - GOLD stage 3: £3422.57 - GOLD stage 4: £3756.23 |
| **Punekar, 2015a58**  Country: UK  Setting: Primary care Currency [cost year]: GB pound [2011] | **Retrospective cohort [24 months]**  N=7881 newly diagnosed COPD patients, of whom 7661 were classified by disease severity, as follows:   - Mild: N=1475 - Moderate: N=4147 - Severe: N=1754   Very severe: N=285 | **COPD severity:** Mild-to-very severe COPD defined according to GOLD criteria as follows:   - Mild: FEV1≥80% predicted - Moderate: 50%≤FEV1<80% predicted - Severe: 30%≤FEV1<50% predicted - Very severe: FEV1<30% predicted   **Exacerbation:** A moderate exacerbation was defined as an episode characterized by management with COPD-specific antibiotics and OCS (within 5 days of initiation of antibiotics) and/or a medical diagnosis of COPD exacerbation. A severe exacerbation was defined as an episode characterized by hospitalization for COPD | NR | **Mean cost PPPY at 12 months post-COPD diagnosis (by COPD severity):**   - Mild: £1962 - Moderate: £2012 - Severe: £2151 - Very severe: £2258   **Mean cost PPPY at 24 months post-COPD diagnosis (by COPD severity):**   - Mild: £1921 - Moderate: £2046 - Severe: £2092 - Very severe: £2293 |
| **Punekar, 2015b43** Country: UK Setting: Primary care Currency [cost year]: GB pound [2013–2014]  *Publications linked by named data source: Punekar, 2013a;40 Punekar, 2013b;41 Punekar, 2013c;42  Punekar, 201444 Punekar, 2015a57*  *Publications linked by sample: Punekar, 2013b41* | **Retrospective cohort [12 months]**  N=39,639 all COPD patients  Stratified by medication:   - LAMA + LABA + ICS: N=4969 - LAMA + ICS: N=2370 - LABA + ICS: N=15,375 - LABA + LAMA: N=525 - LAMA: N=13,511 - LABA: N=2899 | **COPD severity:** NR (but patients on triple therapy are assumed to have had moderate-to-very severe COPD; and use of single and double therapy also used as a proxy for disease severity)  **Exacerbation:** NR | NR | **Costs PPPY (using treatment regimen as a proxy for disease severity):**   - Patients on triple therapy: £2876 - Patients on LAMA + ICS: £2410 - Patients on LABA + ICS: £2334 - Patients on LABA + LAMA: £2240 - Patients on LAMA: £2223 - Patients on LABA: £2139 |
| **Roberts, 2011a59**  Country: US Setting: Inpatient Currency [cost year]: US dollars ($) [NR]  *Publications linked by sample: Short, 201360* | **Retrospective cohort [NR]**  N=6576 COPD patients hospitalized for a severe exacerbation | **COPD severity:** NR  **Exacerbation:** NR (patients hospitalized due to COPD severe exacerbations) | **Total costs for severe exacerbation leading to hospitalization, mean:** $6900 | NR |
| **Sharafkhaneh, 201477** Country: US Setting: NR (claims database) Currency [cost year]: US dollars ($) [2007–2010] | **Retrospective cohort [1 year]**  N=66,004 COPD patients  By database of patients:   - ORD (used to develop a rule based on SABA use): N=56,581 - Impact National Benchmark Database (used to validate findings): N=9423   By the doses of SABA used per day:   - <1.5 doses: 42,388 - ≥1.5 doses: 23,616   [All patients ≥1.5 doses of SABA per day were at high risk of experiencing ≥2 exacerbations per year, as identified in the study] | **COPD severity:** GOLD initiative classification (no specific severity levels described)  **Exacerbation:** a  COPD-related hospitalization, emergency department visit or urgent care visit; a new prescription for an oral corticosteroid or administration of an IV corticosteroid within 7 days following a COPD-related ambulatory visit; or a new prescription for an oral antibiotic or administration of an injectable/IV antibiotic within 7 days following a COPD-related ambulatory visit. Each “episode” may have consisted of multiple health care encounters (exacerbation events) and was considered complete after 7 days without any exacerbation events | NR | **COPD-related total costs PPPY in the year post-index date (date of second COPD diagnosis) for the ORD database by SABA type and dosing amount, mean (SD):**  Nebulized SABA only patients:   - ≥1.5 doses/day: $21,867.86 ($53,910.13) - <1.5 doses/day: £11,686.44 ($32,707.21)   MDI SABA only patients:   - ≥1.5 doses/day: $9216.39 ($30,710.31) - <1.5 doses/day: $7333.93 ($24,853.49)   Nebulized + MDI SABA patients:   - ≥1.5 doses/day: $15,805.73 ($35,260.01) - <1.5 doses/day: $11,232.65 ($27,005.86)   **COPD-related total costs PPPY in the year post-index date (date of second COPD diagnosis) for the Impact National Benchmark Database by SABA type and dosing amount, mean (SD):**  Nebulized SABA only patients:   - ≥1.5 doses/day: $16,566.24 ($52,766.70) - <1.5 doses/day: $10,577.25 ($59,959.88)   MDI SABA only patients:   - ≥1.5 doses/day: $5770.90 ($12,399.49) - <1.5 doses/day: $5094.99 ($14,532.00)   Nebulized + MDI SABA:   - ≥1.5 doses/day: $12,534.35 ($29,452.12) - <1.5 doses/day: $7952.04 ($18,996.95) |
| **Silver, 201013**  Country: US Setting: Inpatient Currency [cost year]: US dollars ($) [NR]  *Publications linked by named data source: Dalal, 2010;11 Lindenauer, 2006;12 Xu, 201214* | **Cross-sectional [NA]**  N=69,841 COPD patients hospitalized for exacerbations | **COPD severity:** NR  **Exacerbation:** NR (patients hospitalized due to COPD exacerbations) | **Cost per admission of severe exacerbation, mean (95% CI):**   - Total: $6992 ($6925–$7058) - Patients with ICU admission: $17,293 ($16,726–$17,859) - Patients who died during hospital stay: $16,889 ($15,785–$17,992)   [Additional costs per exacerbation reported for subgroup of patients based on comorbidities] | NR |
| **Small, 201662**  Country: Japan Setting: Primary care and outpatient  Currency [cost year]:  Japanese yen (¥) converted to Euros (€) (Exchange rate: 1JPY = €0.0075) [2015] | **Cross-sectional [NA]**  N=420 COPD patients  Stratification by dyspnea severity (MRC score):   - Moderate-to-severe dyspnea (MRC ≥2): N=163 - Patients with no/mild dyspnea (MRC <2): N=257 | **COPD severity:** No/mild-to-severe dyspnea defined as follows:   - Moderate to severe: modified MRC score ≥2 - No/mild dyspnea: MRC <2 - (Comparison of severity to GOLD criteria/FEV1 % predicted not provided, but dyspnea said to be a predictor of COPD severity by study authors)   **Exacerbation:** NR(moderate exacerbation was costed as treatment with prednisolone 40 mg daily for 5 days and/or co-amoxiclav 875 mg/125 mg for 7 days when an antibiotic was prescribed; definition of severe exacerbation: NR) | NR | **Total annual direct cost per patient, mean:**   - Moderate-to-severe dyspnea: €6348 - Mild/no dyspnea: €2797 |
| **Stanford, 200663**  Country: US Setting: ED and inpatient Currency [cost year]: US dollars ($) [2001] | **Retrospective cohort [30 days]**  N=NR COPD patients with hospital encounters (includes patients admitted to ED)  (Data reported by number of hospital encounters, n=59,735)  By type of hospital admission:   - ED visit: N=20,431 - Standard inpatient: N=33,210 - Severe inpatient intubation/ICU: N=6094 - ICU/no intubation: N=4456 | **COPD severity:** NR  **Exacerbation:** NR (all patients hospitalized for COPD exacerbations and/or with ED visit) | **Unadjusted cost per hospital admission by type of hospital admission, mean (SD):**  Total costs:   - ED: $571 ($507) - Standard admission: $5997 ($5752) - ICU or intubation: $16,428 ($2576) - ICU/no intubation: $11,352 ($12,111) - Intubation/no ICU: $22,744 ($27,727) - ICU + intubation: $36,743 ($62,886)   Medication costs:   - ED: $41.30 - Standard admission: $885.50 - ICU/no intubation: $1633.36 - Intubation/no ICU: $4050.26 - ICU + intubation: $6460.48 | NR |
| **Tran, 201678**  Country: US Setting: Inpatient Currency [cost year]: US dollars ($) [NR] | **Retrospective cohort [6 months]**  N=210 with first-observed ED visit and subsequent admissions to hospital for COPD | **COPD severity:** NR  **Exacerbation:** NR (all patients were admitted to hospital for COPD exacerbation) | NR | **Total costs in first 6 months after discharge, according to receipt of appropriate PCE-D as defined by HEDIS, by cause of cost:**  COPD-related costs:   - Received PCE-D: $2181 - Did not receive PCE-D: $1017   All-cause costs:   - Received PCE-D: $13,750 - Did not receive PCE-D: $9981 |
| **Vitacca, 201173**  Country: Italy Setting: Inpatient and outpatient Currency [cost year]: Euros (€) [NR] | **Prospective cohort [1 year]**  N=83 very severe COPD patients  Stratified by home treatments:   - NIMV: N=30 (36.1%) - IMV: N=12 (14.5%) - Spontaneous breathing on LTOT: N=41 (49.4%) | **COPD severity**: Very severe COPD as defined by patients meeting ≥2 of the following criteria:   - FEV1<30% predicted - Oxygen dependence - ≥1 hospitalization in preceding year - Left heart failure or other comorbidities - Weight loss in the last 6 months or chronic cachexia - Decreased functional status - Increasing dependence during activities of daily life - 70 years old   **Exacerbation**: NR | NR | **Total costs (sum of acute and chronic) per patient per day, mean (SD):**   - All patients: €96 (€112) [range: €9.0–€526] - NIMV: €117 (€134) - IMV: €66 (€39) - LTOT: €88 (€106) - Total cost removing ICU (which only occurred in a few patients): €56 (€39)   **Total cost PPPY, mean:**   - All patients: €38,820 - NIMV: €42,340 - IMV: €23,725 - LTOT: €32,120 |
| **Xu, 201214** Country: US Setting: Inpatient Currency [cost year]: US dollars ($) [NR]  *Publications linked by named data source:  Dalal, 2010;11 Lindenauer, 2006;12 Silver, 201013* | **Retrospective cohort [NR]**  N=21,017 COPD patients with 33,723 acute exacerbation events managed in hospital | **COPD severity:** NR  **Exacerbation:** NR (all patients managed in hospital for acute exacerbation of COPD) | **Cost per inpatient exacerbation event, mean (median):**   - Overall: $9430 ($6292) - Without ICU management: $6958 ($5552) - With ICU management: $20,278 ($13,684) | NR |
| **Yu, 201179**  Country: US  Setting: Hospital (healthcare service claims)  Currency [cost year]:US dollars ($) [2008] | **Retrospective cohort [mean 2.9 (SD: 1.3) years]**  N=228,978 COPD patients with ≥1 COPD exacerbation;  2,644,174 patient-quarters | **COPD severity:** NR  **Exacerbation:** A claim for oral or parenteral corticosteroids on the same day or within 7 days following a COPD claim. Exacerbations were further categorized as being severe or non-severe:   - Severe exacerbation: patient-quarters with an exacerbation involving either a hospitalization on the same day or death within 7 days of the COPD diagnosis, otherwise, the exacerbation was defined as non-severe - Any exacerbation: patient-quarters with severe and non-severe exacerbations | NR | **COPD-related costs per patient-quarter, mean (SD):**  Any exacerbation:   - Medical: $2215 ($12,059) - Inpatient: $1472 ($7113) - ED: $39 ($274) - Outpatient: $345 ($9540) - Other medical: $360 ($1409) - Pharmacy costs: $416 ($471)   Non-severe exacerbation:   - Medical: $1126 ($11,485) - Inpatient: $367 ($3851) - ED: $42 ($283) - Outpatient: $359 ($10,667) - Other medical: $358 ($1437) - Pharmacy: $396 ($456)   Severe exacerbation:   - Medical costs: $6521 ($13,254) - Inpatient costs: $5838 ($12,962) - ED costs: $28 ($233) - Outpatient costs: $287 ($1036) - Other medical costs: $367 ($1289) - Pharmacy costs: $493 ($519)   No exacerbation:   - Medical costs: $424 ($3303) - Inpatient costs: $190 ($3087) - ED costs: $4 ($81) - Outpatient costs: $75 ($602) - Other medical: $156 ($802) - Pharmacy costs: $233 ($360) |

**Abbreviations:** CI, confidence interval; COPD, chronic obstructive pulmonary disease; E-COPD, exacerbations due to chronic obstructive pulmonary disease; ED, emergency department; FEV1, forced expiratory volume in 1 s; FVC, forced vital capacity; GOLD, Global Initiative for Chronic Obstructive Lung Disease; HRU, healthcare resource utilization; HEDIS, Healthcare Effectiveness Data and Information Set; ICS, inhaled corticosteroid; ICU, intensive care unit; IMV, invasive mechanical ventilation; ITT, intent to treat; IV, intravenous; JPY, Japanese yen; LABA, long-acting β2-agonist; LAMA, long-acting muscarinic antagonist; MDI, metered-dose inhaler; MRC, Medical Research Council; LTOT, long-term oxygen therapy; NA, not applicable; NIMV, non-invasive mechanical ventilation; NR, not reported; OCS, oral corticosteroid; ORD, Optum Research Database; PCE-D, pharmacotherapy with an inhaled bronchodilator; PPPY, per patient per year; RUSIC, Resource Utilization Study in COPD; SABA, short-acting β2-agonist; SD, standard deviation; SEPAR, Sociedad Española de Neumología y Cirugía Torácica; UK, United Kingdom; US, United States.

**Supplementary Table 6** Key drivers of HRU (n=24 studies)

| **Author, year Country, setting** | **Study design [length of follow-up/time period available for HRU data], sample size** | **HRU data analyzed (dependent variable) and method of multivariate analysis** | **Independent variables included in final model** | **Relevant independent variables found to be statistically significant drivers of HRU** | **Relevant independent variables not found to be statistically significant drivers of HRU** |
| --- | --- | --- | --- | --- | --- |
| **Benzo, 20163**  Country: US  Setting: Outpatient | **Cross-sectional [NA]**  N=310 COPD patients | - ED visits within the previous 12 months - A logistic regression model was developed to predict ED visits | **EQ as measured by questionnaire after adjusting for:**   - FEV1 % - Age - Degree of breathlessness (based on MRC dyspnea scale score) | **Adjusted odds ratio, 95% CI, *p*-value:**   - For every 1-point increase in EQ, adjusted odds of not having an ED visit increased by 1% (adjusted OR 1.013; 95% CI 1.001–1.026; *p*=0.02) - NR | **NR** |
| **Chen, 20099**  Country: Canada  Setting: Inpatient (acute care hospitals) | **Retrospective cohort [1 year]**  N=108,726 COPD patients  By age, years:   - 40–49: N=3770 - 50–59: N=10,567 - 60–69: N=24,510 - 70–79: N=40,844 - ≥80: N=29,035   By sex:   - Men: N=59,291 - Women: N=49,435   By CCI:   - 0: N=49,330 - 1: N=30,125 - ≥2: N=29,271   By length of hospital stay:   - <6 days: N=49,784 - ≥6 days: N=58,942 | - Readmission for COPD within 1 year - A Cox proportional hazard model | - Arrhythmias - Congestive heart disease - CCI - Ischemic heart disease - Pulmonary heart disease   [Unclear whether this represents the full list of dependent variables included in the model]  [Adjusted for age and length of stay at baseline and province of residence, with additional adjustment for sex for the “total” (ie whole population unstratified) model] | **For COPD readmission within a year, adjusted hazard ratio (95% CI):**   - Ischemic heart disease: - Women: 1.06 (1.02–1.09) - Congestive heart disease: - Men: 1.20 (1.16–1.24) - Women: 1.22 (1.02–1.11) - Total: 1.20 (1.17–1.23) - Arrhythmias: - Women: 1.06 (1.02–1.11) - Pulmonary heart disease: - Men: 1.35 (1.22–1.46) - Women: 1.38 (1.27–1.50) - Total: 1.36 (1.29–1.44) - CCI: no further data reported | **For COPD readmission within a year, adjusted hazard ratio (95% CI):**   - Ischemic heart disease: - Men: 1.00 (0.97–1.03) - Total: 1.02 (0.99–1.04) - Arrhythmias: - Men: 1.01 (0.97–1.04) - Total: 1.03 (1.00–1.06) |
| **Dhamane, 201618**  Country: US  Setting: Community (population based) | **Cross-sectional [NA] [HRU data were collected for the 6 months prior to index]**  N=2497 COPD patients  By COPD severity:   - Mild: N=1384 - Moderate: N=938 - Severe: N=175   The study also included 57,892 patients without COPD | - HRU in the past 6 months for any condition: - ED visits - Hospitalizations - Healthcare professional visits - Generalized linear models with negative binomial distributions were used for the HRU measures | - Severity of COPD (mild, moderate and severe) [Adjusted for age, sex, medication coverage, BMI, smoking status, exercise frequency and CCI] | **Adjusted mean number of events per patient in past 6 months, *p*-value:**   - ED visits for any condition: - Mild COPD: 0.23 - Moderate COPD: 0.34 - Severe COPD: 0.49   Difference across groups: *p*<0.001   - Hospitalizations: - Mild COPD: 0.13 - Moderate COPD: 0.16 - Severe COPD: 0.23   Difference across groups: *p*<0.001 | The text of the study report suggests, but does not explicitly state, that severity of COPD was not significantly and independently associated with the rate of healthcare professional visits in the past 6 months |
| **DuVall, 201521**  Country: US  Setting: Inpatient | **Retrospective cohort [60 days]**  N=89,502 patients who had an index hospitalization for COPD | - All-cause readmission within 30 days - Multivariate logistic regression | - Care site measures - Comorbidities - Demographics - Discharge disposition - History of hospitalizations - Index hospital length of stay - ICU stays - Smoking | **For first readmission for any cause, OR, *p*-value:**   - Previous hospitalizations: OR 1.39 for 1 previous hospitalization to 3.24 for 5 or more previous hospitalizations, *p*<0.001 - Moderate/severe liver disease: OR 1.44, *p*=0.003 - Paraplegia: OR 1.41, *p*<0.001 - Pulmonary hypertension: OR 1.32, *p*=0.016 - Substance abuse: OR 1.28, *p*<0.001 - Heart failure: OR 1.25, *p*<0.001   [These variables were said to be the strongest predictors of readmission] |  |
| **Escarrabill, 201522**  Country: Spain  Setting: Inpatient | **Retrospective cohort [90 days]**  N=910 patients admitted for acute exacerbation of COPD | - Hospital readmission for respiratory causes: - At 30 days - At 90 days - Length of hospital stay   [Variables analyzed using separate models]   - Predictors of the length of hospital stay and type of hospital were analyzed using a multivariate linear regression model - Risk factors for hospital readmissions for respiratory causes at 30 and 90 days were analyzed using multivariate logistic regression models | For length of hospital stay:   - Age - Hospital level (based on annual number of discharges for acute exacerbation of COPD: Level I hospital: <100; Level II hospital: 100–400; Level III hospital: >400) - Number of admissions in previous year - Number of comorbidities   For hospital readmission for respiratory causes at 30 days and 90 days:   - Previous diagnosis of COPD - Use of LTOT - FEV1 % predicted - Regular activity - Length of hospital stay - Inclusion in a hospital-at-home program   [Adjusted for severity of COPD, as measured by use of home LTOT and FEV1 % predicted levels] | **For length of hospital stay, *p*-value:**   - Level of hospital: length of stay increased by 0.8 days as level of hospital increased, *p*=0.049   **For risk of hospital readmission for respiratory cause at 30 days, *p*-value:**   - Inclusion in a hospital-at-home program: probability of readmission if included 5.7% vs if not included 13%, *p*=0.002   **For risk of hospital readmission for respiratory cause at 90 days, variables associated with lower risk, OR; *p*-value:**   - Previous diagnosis of COPD: 0.406; 0.015 - Use of LTOT: 0.406; 0.015 - Better FEV1 % predicted values: 0.977; 0.010 - Regular physical activity: undertaken by 71% of those not readmitted vs 58% of those readmitted: NR; 0.028   **For risk of hospital readmission for respiratory cause at 90 days, r; *p*-value:**   - Length of hospital stay:  –0.152; 0.039 | **For length of hospital stay, non-significant variables:**   - Non-significant variables not clearly reported   **For risk of hospital readmission for respiratory cause at 30 days:**   - Non-significant variables not clearly reported   **For risk of hospital readmission for respiratory cause at 90 days, OR; *p*-value:**   - Age: 1.028; 0.051 - Inclusion in hospital-at-home program (no further details reported)   [No other clear details on non-significant variables] |
| **Gallego, 201625**  Country: Spain  Setting: Outpatient | **Prospective cohort [1 year]** N=118 patients with severe COPD who had 380 episodes of acute infectious exacerbations | - Requirement for hospital admission to manage an individual exacerbation of COPD - A generalized estimating equation logistic model | - CCI - C-reactive protein concentration - Presence of baseline hypercapnia - Use of LTOT | **Requirement for hospital admission to manage an exacerbation of COPD, OR (95% CI); *p*-value:**   - Baseline hypercapnia: 2.70 (1.46–4.9); 0.01 - C-reactive protein concentration: - 47.8–100 mg/L: 2.21 (1.05–4.68); 0.03 - >100 mg/L: 4.23 (2.12–8.44); <0.0001 | **Requirement for hospital admission with exacerbation of COPD, OR (95% CI); *p*-value:**   - CCI: 1.12 (0.95–1.32); 0.15 - LTOT: 1.14 (0.61–2.13); 0.67 - C-reactive protein concentration: - 18.7–47.7 mg/L: 1.64 (0.85–3.15); 0.13 |
| **Garcia-Aymerich, 201127**  Country: US  Setting: Community (population based) | **Retrospective cohort [median 10 person-years]** N=20,571 participants  By COPD severity:   - Normal: N=7329 - Restricted: N=3169 - GOLD 0: N=4454 - GOLD 1: N=2696 - GOLD 2: N=2264 - GOLD 3 or 4: N=596 | - Risk of hospitalization for COPD over median follow-up of 10 years - Zero-inflated negative binomial regression | - COPD severity according to GOLD staging   [Adjusted for age, gender, education, smoking, physical activity, diabetes, heart disease and study cohort (CHS and ARIC and cohorts)] | **For experiencing a hospitalization in the follow-up period, adjusted incidence rate ratio (95% CI):**   - Normal: 1.0 - Restricted: 4.7 (3.7–6.1) - Modified GOLD stage 0 (vs normal lung function): 2.1 (1.6–2.6) - Modified GOLD stage 1 (vs normal lung function): 3.2 (2.6–4.0) - Modified GOLD stage 2 (vs normal lung function): 8.0 (6.4–10.0) - Modified GOLD stage 3 or 4 (vs normal lung function): 25.5 (19.5–33.4) | NR [unclear whether any other variables were included in the final model] |
| **García-Polo, 201280**  Country: Spain  Setting: NR (likely to be outpatient because although at least some of patients in the high HRU group had been hospitalized in the previous year, the study states that data were from patients monitored by the respiratory services of Spanish public hospitals suggesting that they were not currently hospitalized) | **Cross-sectional study [NA]**  115 COPD patients:   - High HRU group: N=64 - Low HRU (control) group: N=51   [High HRU was defined as having had the following in the previous year: 1 admission for a COPD exacerbation; 2 or more ED visits for COPD exacerbation; or 2 or more unscheduled outpatient visits related to COPD] | - High HRU - Logistic regression model was carried out by adjusting the high resource utilization, for all the variables showing significant differences across the high HRU and control groups in the bivariate analysis. A predictive model for high utilization of healthcare resources was constructed with the regression analysis variables associated with elevated utilization of healthcare resources | - BODE index - Hemoglobin oxygen saturation - LCADL score (higher scores represent greater disability) - EQ-5D - Hospital Anxiety and Depression Scale Anxiety subscale score - Hospital Anxiety and Depression Scale Depression subscale score - Leukocyte count - Fibrinogen level | **For high HRU, OR (95% CI):**   - LCADL score: 1.046 (1.001–1.093) - Leukocyte count: 1.295 (1.032–1.625) - Fibrinogen level: 1.005 (1.002–1.008)   **Variable associated with lower likelihood of high HRU, OR (95% CI):**   - Hemoglobin oxygen saturation: 0.869 (0.760–0.994) | **For high HRU, OR (95% CI):**   - BODE index: 0.832 (0.625–1.130) - EQ-5D: 0.548 (0.060–4.999) - Hospital Anxiety and Depression Scale Anxiety subscale score: 0.934 (0.792–1.101) - Hospital Anxiety and Depression Scale Depression subscale score: 1.111 (0.926–1.334) |
| **Gatheral, 201481**  Country: UK  Setting: Inpatient | **Retrospective cohort study [3.5 years]**  N=406 patients hospitalized for exacerbation of COPD | - Annual rate of respiratory admissions - Annual number of respiratory inpatient days - Annual rate of non-respiratory admissions - Annual number of non-respiratory inpatient bed days - Logistic regression | - Severity of bronchiectasis   [Adjustment for age, gender, CCI, increasing severity of emphysema and bronchial wall thickening] | - For annual rate of respiratory admissions: increasing severity of bronchiectasis, *p*=0.044 - For annual number of respiratory inpatient days: increasing severity of bronchiectasis, *p*<0.001 | - For annual rate of non-respiratory admissions: increasing severity of bronchiectasis [*p*=NR] - For annual number of non-respiratory inpatient bed days: increasing severity of bronchiectasis [*p*=NR] |
| **Mahmud, 201533**  Country: US  Setting: Inpatient | **Retrospective cohort [30 days]**  N=2,723,541 patients hospitalized for acute exacerbations of COPD:   - Patients with reflux esophagitis: N=9064 - Patients with GERD alone: N=335,760 - Patients without any reflux disease: 2,378,717 | - Length of hospital stay for exacerbation of COPD - Multiple linear regression model | Diagnosis of reflux disease (including subgroup analysis of diagnosis of reflux esophagitis vs GERD alone vs no reflux disease)  [Adjusted for age, CCI, gender, disease severity, medical conditions, hospital characteristics] | **For length of hospital stay for exacerbation of COPD, beta-coefficient; *p*-value:**   - Positive association of length of stay with diagnosis of reflux esophagitis: 0.5540; *p*<0.0001 - Longer length of stay for patients with reflux esophagitis than for those: - with GERD alone: 1.079; *p*<0.0001; - without reflux disease: 0.4799; *p*<0.0001 | **For length of hospital stay for exacerbation of COPD:** No association with diagnosis of GERD [no statistical data reported] |
| **McGhan, 200737**  Country: US  Setting: Inpatient | **Retrospective cohort [follow-up for up to 6 years]**  N=51,353 patients hospitalized for an exacerbation | - Risk for rehospitalization for exacerbation of COPD during follow-up - Stepwise Cox proportional hazards model | - Age (per year) - Asthma - Diabetes, complicated and uncomplicated - Hypertension, complicated and uncomplicated - Male gender - Pulmonary hypertension - Prior COPD stays (per stay) - Prior non-COPD stays (per stay) - Race | **For rehospitalization during follow-up, hazard ratio (95% CI):**   - Male gender: 1.28 (1.13–1.45) - Pulmonary hypertension: 1.24 (1.14–1.35) - Prior COPD stays (per stay): 1.23 (1.22–1.24) - Asthma: 1.11 (1.04–1.18) - Age (per year): 1.01 (1.00–1.01) [reported in publication to be significant] - Prior non-COPD stays (per stay): 1.03 (1.02–1.04)   **Variables associated with lower risk of rehospitalization, hazard ratio (95% CI):**   - Diabetes, complicated: 0.76 (0.63–0.91) - Hypertension, complicated: 0.77 (0.66–0.90) - Diabetes, uncomplicated: 0.86 (0.81–0.90) - Hispanic ethnicity: 0.86 (0.76–0.98) - Hypertension, uncomplicated: 0.95 (0.91–0.98) | **Hazard ratio (95% CI):**   - Black race: 1.01 (0.93–1.06) - Other race/ethnicity: 0.78 (0.60–1.02) |
| **Miravitlles, 200646**  Country: Spain  Setting: Outpatient | **Cross-sectional study [NA]**  N=1057 COPD patients  By number of exacerbations in the previous year:   - <3: N=757 - ≥3: N=300 | - Hospital admission during the previous year [unclear from study report whether this was any-cause or COPD-related admission] - Logistic regression model | - Age - Anticholinergic agents - BMI - Comorbidity coded as ‘‘0=no, 1=yes’’ for any of the following: ischemic heart disease, diabetes mellitus, cor pulmonale or hypertension, chosen by presenting a prevalence of 5% or greater of the study population - Degree of dyspnea - Educational level - Inhaled SABA - Inhaled LABA - ICS - LTOT - Living alone - Presence or absence of chronic expectoration - Severity of the underlying disease quantified by FEV1 (% predicted) as a continuous variable and classified using GOLD stages 2, 3 and 4 (no mild patients, GOLD stage 1, were included in the study) - Sex - SGRQ total score - Smoking habits (active smoker vs ex-smoker) - Treatment with oral steroids - Years of evolution of the disease   [Unclear from study report which, if any, of these variables were omitted from the final model, but data variables included in the final model are presented in the adjacent columns] | **For hospital admission in previous year, adjusted OR (95% CI); *p*-value:**   - Use of LTOT: 3.47 (2.35–5.12); <0.0001 - Increasing number of previous exacerbations: 1.42 (1.30–1.55); <0.0001 - Use of SABA: 1.73 (1.23–2.44); 0.0017 - SGRQ total score: 1.01 (1.00–1.02); 0.0008 - Incomplete primary education: 1.56 (1.05–2.32); 0.026 | **For hospital admission in previous year, adjusted OR (95% CI); *p*-value:**   - Severity of the disease measured by the GOLD stage: not significant [statistical data not presented] - Degree of baseline dyspnea or comorbidity: not significant [statistical data not presented] |
| **Nantsupawat, 201250**  Country: US  Setting: Inpatient | **Retrospective cohort [mean 16 days]**  N=81 COPD patients hospitalized for an exacerbation  (Data are reported per admissions N=103)  Among N=36 patients with pulmonary function tests within the previous 5 years, by COPD severity:   - Mild: N=1 - Moderate: N=7 - Severe: N=20 - Very severe: N=8 | - 30-day readmission for COPD - Logistic regression analysis was used to analyze which factors affected the early rehospitalization rate | - Coronary artery disease - Ejection fraction <55% - Having a post-discharge follow-up call - Unilateral pulmonary infiltrates on admission | **For COPD readmission within 30 days, OR (95% CI); *p*-value:**   - History of coronary artery disease: 6.43 (1.10–37.42); 0.039 - Presence of unilateral pulmonary infiltrates on admission: 12.79 (1.89–86.44); 0.009 | **For COPD readmission within 30 days, OR (95% CI); *p*-value:**   - Ejection fraction <55%: 4.52 (0.74–27.54); 0.101 - Having a post-discharge follow-up call: 0.82 (0.16–4.32); 0.815 |
| **Nguyen, 201451**  Country: US  Setting: Inpatient | **Retrospective cohort [30 days]**  N=4871 COPD patients hospitalized for an exacerbation | - 30-day readmission for COPD - Generalized estimating equations | - At least 150 mins/week of moderate to strenuous physical activity - History of COPD-related hospitalizations in previous year - History of non-COPD-related hospitalizations in previous year - Having 3 or more chronic conditions - New oxygen prescription at discharge - Presence of anemia   [Other variables may have been included in the model but are not reported] | **For COPD readmission within 30 days, relative risk (95% CI):**   - History of COPD-related hospitalizations in previous year: 1.5 (NR) - History of non-COPD-related hospitalizations in previous year: 1.4 (NR) - Presence of anemia: 1.6 (NR) - Having 3 or more chronic conditions: 1.5 (NR) - New oxygen prescription at discharge: 1.5 (NR)   **Variables associated with lower risk of admission, relative risk (95% CI):**   - At least 150 mins/week of moderate to strenuous physical activity (vs no physical activity): 0.79 (0.64–0.98) | NR |
| **Nishi, 201552**  Country: US  Setting: Inpatient and outpatient | **Retrospective cohort [1-year follow-up, data collected for patient cohorts for each of 10 separate calendar years between 2001 and 2010]**  N=329,482 COPD patients with ≥2 outpatient visits with a diagnosis of COPD or acute hospitalization for either COPD as the primary diagnosis, or for respiratory failure as the primary diagnosis with COPD as a secondary diagnosis | - LTOT - Multivariate analysis using a generalized estimate equation model | - Age - Elixhauser Comorbidity score - Gender - Low socioeconomic status - Race - Region - Year | **For use of LTOT, OR (95% CI):**   - Low socioeconomic status (vs no low socioeconomic status): 1.28 (1.24–1.32) - Elixhauser Comorbidity score 1 (vs 0): 1.12 (1.09–1.16) - Elixhauser Comorbidity score ≥2 (vs 0): 1.59 (1.55–1.64) - Recruitment years (vs 2001): - 2002: 1.05 (1.02–1.09) - 2003: 1.13 (1.09–1.17) - 2004: 1.24 (1.20–1.28) - 2005: 1.21 (1.17–1.26) - 2006: 1.36 (1.31–1.41) - 2007: 1.43 (1.37–1.48) - 2008: 1.43 (1.37–1.48) - US region (vs New England): - East North Central: 1.54 (1.44–1.65) - East South Central: 1.53 (1.42–1.65) - Mountain: 2.54 (2.35–2.75) - Pacific: 1.30 (1.21–1.41) - South Atlantic: 1.54 (1.45–1.65) - West North Central: 1.83 (1.69–1.98) - West South Central: 1.55 (1.44–1.66)   **Variables associated with lower likelihood of LTOT use, OR (95% CI):**   - Age ≥85 years (vs 66–74 years): 0.91 (0.87–0.94) - Male gender (vs female): 0.83 (0.81–0.85) - Black race (vs white): 0.77 (0.6–0.77) - Other race (vs white): 0.62 (0.57–0.67) - Recruitment years (vs 2001): - 2009: 0.78 (0.75–0.82) - 2010: 0.85 (0.82–0.88) | **For use of LTOT, OR (95% CI):**   - Age 75–84 years (vs 66–74): 1.01 (0.9–1.04) - US region (vs New England): - Middle Atlantic: 0.98 (0.92–1.05) |
| **Punekar, 2015a58**  Country: UK  Setting: Primary care | **Retrospective cohort [24 months]**  N=7881 newly diagnosed COPD patients, of whom 7661 were classified by disease severity, as follows:   - Mild: N=1475 - Moderate: N=4147 - Severe: N=1754 - Very severe: N=285 | - More than 1 GP visit during the 24-month observation period - Single GP visit during the 24-month observation period - Logistic regression analysis | - Anxiety - Congestive heart disease - Depression - Female gender - Obesity - Presence of asthma - Presence of 1 or more comorbidities - Severe airflow obstruction - Very severe airflow obstruction   [Unclear from study report whether this represents a complete list of variables included in the final model] | **For more than 1 GP visit during the follow-up period among patients with significant dyspnea (MRC grade ≥3), OR (95% CI):**   - Female gender: 1.42 (1.21–1.66) - Obesity: 1.52 (1.23–1.85) - Depression: 1.75 (1.38–2.23) - Anxiety: 1.45 (1.17–1.81) - Presence of 1 comorbidity: 2.86 (2.44–3.35) - Presence of 1 or more than 1 comorbidities: 5.32 (3.12–9.06)   **For a single GP visit during the follow-up period among patients with significant dyspnea (MRC grade ≥3) [no OR reported]**   - Female gender - Obesity - Depression - Presence of 1 comorbidity - Presence of 1 or more than 1 comorbidities | **Single GP visit among patients with significant dyspnea (MRC grade ≥3) [no OR reported]:**   - Anxiety   [No details of any other non-significant variables reported] |
| **Quintana, 201458**  Country: Spain  Setting: Inpatient including ED | **Prospective cohort [2 months]**  N=2332 COPD patients visiting ED for exacerbation of COPD, of which 1403 were admitted to hospital for the index ED event | - Readmission for an exacerbation of COPD within 2 months of index event (ED attendance with hospital admission) - Multivariate analysis using generalized linear mixed models | - Admissions for exacerbation of COPD in the last year (mean) - Baseline FEV1 % predicted - Baseline dyspnea (MRC scale) - Dyspnea 1 week after the index ED visit [adjusted for dyspnea 24 hrs after the index event] | **For readmission for exacerbation of COPD within 2 months of index event, OR (95% CI); *p*-value:**   - Baseline FEV1 % predicted <30% (vs ≥50%): 1.88 (1.19–2.95); 0.006 - Admissions for exacerbation of COPD in the last year (mean): ≥2 (vs 0): 2.51 (1.74–3.62); <0.001 - Baseline dyspnea (MRC scale): 5 (vs 1): 2.57 (1.10–6.01); 0.03 - Dyspnea 1 week after the index ED visit: - Very severe/severe (vs none/very slight): 2.15 (1.44–3.23) <0.001 - Moderate (vs none/very slight): 1.74 (0.71–3.14) 0.005 | **For readmission for exacerbation of COPD within 2 months of index event, OR (95% CI); *p*-value:**   - Baseline FEV1 % predicted: >30% and <50% (vs ≥50%): 1.32 (0.89–1.95); 0.17 - Admissions for exacerbation of COPD in the last year (mean): 1 (vs 0): 1.28 (0.86–1.92); 0.23 - Baseline dyspnea (MRC scale): 2–3–4 (vs 1): 1.49 (0.71–3.14); 0.29 |
| **Roberts, 2011b61**  Country: UK  Setting: Inpatient | **Retrospective cohort [90 days]**  N=9716 patients hospitalized with an exacerbation of COPD | - Length of hospital stay during index admission - Readmission within 90 days (assumed to be for any cause because not clearly reported whether or not episodes were COPD related) - A series of binary regressions (STATA software binreg procedure) were run to assess the association of various medical conditions with outcome, and to assess the association of the number of conditions (categorized as 0, 1, 2, 3 or more) with outcome | Independent variables explored with respect to length of hospital stay longer than 7 days:   - Alcohol-related condition - Cor pulmonale - Cardiac arrhythmia (eg atrial fibrillation) - Diabetes - Ischemic heart disease - Neurologic condition - Locomotor problems - Lung cancer - Number of conditions - Other malignant disease - Other cardiovascular disease - Other endocrine disorder - Other gastrointestinal condition - Psychiatric condition - Stroke - Left ventricular failure - Thromboembolic disease - Visual impairment   Independent variables explored with respect to readmission within 90 days   - Alcohol-related condition - Cor pulmonale - Cardiac arrhythmia (eg atrial fibrillation) - Diabetes - Ischemic heart disease - Neurologic condition - Number of conditions - Lung cancer - Left ventricular failure - Locomotor problems - Other gastrointestinal condition - Other malignant disease - Other cardiovascular disease - Psychiatric condition - Stroke - Thromboembolic disease - Visual impairment - Other endocrine disorder | **For a hospital stay longer than 7 days, risk ratio (95% CI); *p*-value [vs not having stated comorbidity]:**   - Cor pulmonale: 1.46 (1.30–1.64); <0.001 - Stroke: 1.22 (1.12–1.32); <0.001 - Left ventricular failure: 1.25 (1.15–1.36); <0.001 - Cardiac arrhythmia (eg atrial fibrillation): 1.26 (1.17–1.36); <0.001 - Other malignant disease: 1.16 (1.06–1.27); 0.002 - Thromboembolic disease: 1.21 (1.09–1.34); <0.001 - Locomotor problems: 1.09 (1.01–1.17); 0.03 - Number of conditions (vs none): - 1: 1.19 (1.09–1.29); <0.001 - 2: 1.26 (1.15–1.38); <0.001 - 3–8: 1.34 (1.23–1.47); <0.001   **For readmission within 90 days, risk ratio (95% CI); *p*-value [vs not having stated comorbidity]:**   - Cor pulmonale: 1.34 (1.18–1.54); <0.001 - Lung cancer: 1.30 (1.08–1.56); 0.005 - Neurologic condition: 1.23 (1.09–1.39); 0.001 - Left ventricular failure: 1.22 (1.10–1.35); <0.001 - Alcohol-related condition: 1.19 (1.02–1.40); 0.03 - Ischemic heart disease: 1.20 (1.12–1.27); <0.001 - Diabetes: 1.11 (1.01–1.21); 0.02 - Number of conditions (vs none): - 1: 1.12 (1.02–1.23); 0.02 - 2: 1.18 (1.08–1.29); <0.001 - 3–8: 1.26 (1.14–1.39); <0.001   **Variable associated with lower risk of readmission, risk ratio (95% CI); *p*-value [vs not having stated comorbidity]:**   - Other cardiovascular disease: 0.91 (0.84–0.98); 0.01 | **For a hospital stay longer than 7 days, risk ratio (95% CI); *p*-value [vs not having stated comorbidity]:**   - Visual impairment: 1.02 (0.87–1.20); 0.77 - Neurologic condition: 1.06 (0.94–1.18); 0.34 - Diabetes: 1.02 (0.95–1.10); 0.52 - Other cardiovascular disease: 1.03 (0.96–1.10); 0.40 - Alcohol-related condition: 1.03 (0.89–1.20); 0.68 - Other endocrine disorder: 1.03 (0.92–1.16); 0.59 - Psychiatric condition: 1.00 (0.91–1.11); 0.96 - Ischemic heart disease 1.02 (0.96–1.08); 0.54 - Lung cancer: 0.99 (0.82–1.19); 0.91 - Other gastrointestinal condition: 0.96 (0.88–1.05); 0.35   **For readmission within 90 days, risk ratio (95% CI); *p*-value [vs not having stated comorbidity]:**   - Cardiac arrhythmia (eg atrial fibrillation): 1.09 (0.99–1.19); 0.08 - Psychiatric condition: 1.07 (0.96–1.20); 0.22 - Thromboembolic disease: 1.08 (0.90–1.30); 0.40 - Locomotor problems: 1.05 (0.96–1.15); 0.28 - Stroke: 1.07 (0.95–1.20); 0.24 - Other gastrointestinal condition: 1.02 (0.93–1.12); 0.73 - Visual impairment: 0.97 (0.80–1.18); 0.75 - Other malignant disease: 0.96 (0.85–1.10); 0.60 - Other endocrine disorder: 0.93 (0.81–1.06); 0.27 |
| **Silver, 201013**  Country: US  Setting: Inpatient | **Cross-sectional [NA]**  N=69,841 COPD patients hospitalized for exacerbations | - Admission to an intensive care unit - Length of hospital stay - Logistic regression for ICU admission and negative binomial regression for length of hospital stay | - Anxiety and depression disorders - Anemia - Congestive heart failure - Cardiac dysrhythmias - Intrathoracic malignancies - Ischemic heart disease - Pulmonary vascular disease - Pneumonia - Renal failure - Weight loss/cachexia   [Adjusted for age, gender, race/ethnicity, insurance, hospital type and location and other comorbidities] | **Variables significantly associated with admission to an ICU, adjusted OR (95% CI):**   - Congestive heart failure: 1.49 (1.40–1.59) - Cardiac dysrhythmias: 1.79 (1.68–1.89) - Pulmonary vascular disease: 1.42 (1.30–1.54) - Pneumonia: 2.51 (2.34–2.69) - Anemia: 1.18 (1.10–1.27) - Renal failure: 1.63 (1.50–1.76) - Weight loss/cachexia: 2.12 (1.88–2.39) - Anxiety and depression disorders: 1.09 (1.02–1.16)   **Variables significantly associated with length of hospital stay, adjusted relative risk (95% CI):**   - Congestive heart failure: 1.09 (1.08–1.11) - Cardiac dysrhythmias: 1.16 (1.15–1.18) - Pulmonary vascular disease: 1.15 (1.13–1.17) - Pneumonia: 1.43 (1.41–1.45) - Intrathoracic malignancies: 1.06 (1.03–1.10) - Anemia: 1.16 (1.15–1.18) - Renal failure: 1.16 (1.14–1.18) - Weight loss/cachexia: 1.45 (1.42–1.49) - Anxiety and depression disorders: 1.11 (1.10–1.12) | **Variables not significantly associated with admission to an ICU, adjusted OR (95% CI):**   - Ischemic heart disease: 0.99 (0.93–1.05) - Intrathoracic malignancies: 1.04 (0.88–1.23)   **Variables not significantly associated with length of hospital stay, adjusted relative risk (95% CI):**   - Ischemic heart disease: 0.99 (0.98–1.00) |
| **Stanford, 200663**  Country: US  Setting: ED and inpatient | **Retrospective cohort [30 days]**  N=NR COPD patients hospitalized (includes patients admitted to ED)  (Data reported by number of admissions, n=59,735)  By type of hospital admission:   - ED visit: N=20,431 - Standard inpatient: N=33,210 - Severe inpatient admission (ie involving intubation/ICU): N=6094   By type of severe inpatient admission:   - ICU/no intubation: N=4456 - Intubation/no ICU: N=496 - ICU + intubation: N=1142 | - Length of hospital stay - Linear regression was used to evaluate the influence of patient and hospital characteristics on inpatient length of stay | - Age (vs unit change) - Female (vs male) - Chronic airway obstruction (vs chronic bronchitis) - Emphysema (vs chronic bronchitis) - CCI (vs unit change) - East (vs North) - South (vs North) - West (vs North) - Large hospital (vs small) - Medium hospital (vs small) - Teaching hospital (vs non-teaching) - Blue Cross/Blue Shield (vs Medicare - HMO (vs Medicare) - Medicaid (vs Medicare) - Commercial (vs Medicare) - Other (vs Medicare) - Referral (vs ED admission) - Routine (vs ED admission) - Transfer (vs ED admission) - Other (vs ED admission) - ICU treatment (vs no ICU treatment) - Intubated (vs not intubated) - ICU treatment + intubated (vs neither ICU nor intubated) | **For length of stay, regression estimate; *p*-value:**   - Age (vs unit change): 0.0048; <0.0001 - Female (vs male): 0.1019; <0.0001 - CCI (vs unit change): 0.0494; <0.0001 - East (vs North): 0.1702; <0.0001 - South (vs North): 0.0328; 0.0007 - Medium hospital (vs small): 0.0325; 0.0001 - Large hospital (vs small): 0.0900; <0.0001 - Referral (vs ED admission): 0.1188; <0.0001 - Transfer (vs ED admission): 0.3195; <0.0001 - Routine (vs ED admission): 0.0490; <0.0001 - ICU treatment (vs no ICU treatment): 0.2392; <0.0001 - Intubated (vs not intubated): 0.6809; <0.0001   **Variables associated with shorter length of stay, regression estimate; *p*-value:**   - Chronic airway obstruction (vs chronic bronchitis):  –0.1181; <0.0001 - West (vs North):  –0.0928; <0.0001 - Medicaid (vs Medicare):  –0.0482; 0.0009 - Blue Cross/Blue Shield (vs Medicare): –0.0778; <0.0001 - HMO (vs Medicare):  –0.1915; <0.0001 - Commercial (vs Medicare): –0.0897; <0.0001 - Other (vs Medicare):  –0.1204; <0.0001 - Teaching hospital (vs non-teaching): –0.0717; <0.0001 - Other (vs ED admission):  –0.0975; <0.0001 | **For length of stay, regression estimate; *p*-value:**   - Emphysema (vs chronic bronchitis): 0.0227; 0.3055 - ICU treatment + intubated (vs no ICU or intubation): 0.0538; 0.1558 |
| **Stefan, 201566**  Country: US  Setting: Inpatient | **Retrospective cohort [1 year]**  N=NR COPD patients hospitalized (Data reported per number of COPD admissions n=723,560) | - Use of any ventilation - Hierarchical generalized linear models | - Year (annual change) - Age - Age-by-year interaction - Race - Gagne Comorbidity score - Gagne Comorbidity score-by-year interaction - Gender - Presence of concomitant pneumonia - Presence of concomitant pneumonia-by-year interaction - Number of previous admissions for COPD - Number of previous admissions for COPD-by-year interaction   [Adjusted for year, gender, age group, race, combined comorbidity score, concomitant pneumonia, COPD prior admission and hospital characteristics (ie number of beds, teaching status, urban/rural geographical location)] | **For use of any ventilation, OR (95% CI):**   - Year (annual change): 1.06 (1.05–1.07) - Age-by-year interaction (vs <65 years): - ≥85 years: 1.02 (1.01–1.03) - Gagne Comorbidity score (vs low [≤1]): - Medium (2–3): 2.02 (1.95–2.09) - High (≥4): 4.04 (3.89–4.19) - Presence of concomitant pneumonia (vs no pneumonia): 5.62 (5.43–5.81) - Number of previous admissions for COPD (vs none): - 1: 1.25 (1.21–1.30) - 2: 1.39 (1.32–1.47) - ≥3: 1.66 (1.58–1.75) - Number of previous admissions for COPD-by-year interaction (vs no previous admissions): - 1: 1.01 (1.01–1.02) - 2: 1.02 (1.01–1.03) - ≥3: 1.02 (1.01–1.03)   **Variables associated with lower risk of ventilation, OR (95% CI):**   - Age (vs <65 years): - 65–74 years: 0.93 (0.89–0.96) - 75–84 years: 0.66 (0.64–0.69) - ≥85 years: 0.43 (0.41–0.46) - Race (vs white race): - Hispanic: 0.89 (0.81–0.97) - Gagne Comorbidity score-by-year interaction (vs low [≤1]): - Medium (2–3): 0.98 (0.98–0.99) - High (≥4): 0.97 (0.96–0.97) - Presence of concomitant pneumonia-by-year interaction (vs no pneumonia): 0.88 (0.87–0.88) | **For use of any ventilation, OR (95% CI):**   - Female (vs male): 1.01 (1.00–1.03) - Age-by-year interaction (vs <65 years): - 65–74 years: 1.00 (0.99–1.01) - 75–84 years: 1.01 (1.00–1.01) - Race-by-year interaction (vs white race): - Hispanic: 1.00 (0.99–1.02) - Black: 0.99 (0.98–1.00) - Other: 0.99 (0.98–1.00) |
| **Suissa, 201267**  Country: Canada  Setting: NR (health insurance program database study) | **Retrospective cohort [17 years]**  N=73,106 COPD patients | - Risk of subsequent severe exacerbation requiring hospitalization, over mean follow-up period of 3.6 years - Cox proportional hazard model | - Age (per 10 years) - Cohort entry after year 2000 - Gender - Modified Chronic Disease Score | **For experiencing a subsequent hospitalization for an exacerbation, hazard ratio (95% CI):**   - Men (vs women): 1.21 (1.19–1.22) - Modified Chronic Disease Score (vs first quartile): - Second quartile: 1.08 (1.06–1.10) - Third quartile: 1.10 (1.08–1.12) - Fourth quartile: 1.08 (1.06–1.10)   **Variables associated with lower risk of subsequent hospitalization, hazard ratio (95% CI):**   - Age (per 10 years): 0.90 (0.89–0.91) - Cohort entry after year 2000: 0.82 (0.80–0.83) | **For experiencing a subsequent hospitalization for an exacerbation:**   - NR [but study report suggests all variables tested in the model were predictors of subsequent exacerbations requiring hospitalization} |
| **Vallabhajosyula, 201571**  Country: US  Setting: Inpatient | **Retrospective cohort [NR]**  N=1145 patients treated for acute exacerbation of COPD | - Length of stay in ICU - Need for mechanical ventilation - Length of hospital stay - A negative binominal generalized linear model, hurdle model and chi-square tests | - Severe COPD - BNP level >100 pg/mL (normal laboratory value upper limit) - BNP level >500 pg/mL (heart failure range;   having excluded patients with left ventricular ejection fraction ≤40%)  [Unclear from the study report whether this is a full list of the variables tested in the final model] | **For length of stay in ICU, *p*-value:**   - Severe COPD: <0.05 - BNP level >100 pg/mL: <0.0001 - BNP level >500 pg/mL: <0.0001   **For need for mechanical ventilation, *p*-value:**   - BNP level >100 pg/mL: <0.03 - BNP level >500 pg/mL: <0.01   **For length of hospital stay, *p*-value:**   - Severe COPD: <0.05 - BNP level >100 pg/mL: <0.0001 - BNP level >500 pg/mL: <0.0001 | NR [unclear from the study report whether any of the variables tested in the final model did not show significant association with the outcomes of interest] |
| **Wang, 200574**  Country: Canada  Setting: Inpatient and outpatient | **Retrospective cohort [phase I/baseline data: 12 months preceding admission to hospital for exacerbation of COPD; phase II/follow-up from hospital discharge: 2.5 years]**   - Phase I/baseline data: N=282 COPD patients admitted to hospital for an exacerbation - Phase II/follow-up from hospital discharge: N=54 COPD patients | - ED visits for any cause in 54 patients with COPD over 1-year follow-up period (most such visits [92.9%] were due to COPD) - Readmissions in 54 patients with COPD over 1-year follow-up period (most such readmissions [90.2%] were due to COPD) - Multivariate logistic regression modeling | **For ED visits in the follow-up period:**   - Age - Comorbidity - FEV1 % predicted - SGRQ total score - Frequency of COPD exacerbation - LTOT - Not having a family doctor   [Not explicitly reported whether these were all the variables analyzed]  **For readmissions in the follow-up period:**   - Living alone - COPD exacerbation - Not having a family doctor   [Not explicitly reported whether these were all the variables analyzed] | **For ED visits in the follow-up period, beta-coefficient; OR (95% CI); *p*-value:**   - Age: 0.100; 0.905 (0.847–0.966); 0.0028 - Comorbidity: 0.416; 0.659 (0.451–0.963); 0.0312 - FEV1 % predicted: –2.591; 2.075 (0.012–0.766); 0.0025 [looks to be an error in the CI for the OR, since it does not include the point estimate] - SGRQ total score: 0.060; 0.942 (0.904–0.981); 0.0042 - Frequency of COPD exacerbation: 0.846; 1.349 (0.274–0.672); 0.0002 [looks to be an error in the CI for the OR, since it does not include the point estimate] - LTOT: 1.580; 4.853 (1.327–17.75); 0.0140 - Having a family doctor:  –1.401; 4.059 (1.063–10.51); 0.0405   [Note the study report suggests that age, comorbidity, SGRQ total score were predictors of ED visits; however, this conclusion does not fit with the odds ratios cited for these outcomes in the study report (which suggests they are significantly associated with reduced risk). Reported beta-coefficients seem in line with authors’ conclusions but appear to be multiple errors in cited OR, as confirmed by discussion with statistician]  **For readmissions, beta-coefficient; OR (95% CI); *p*-value:**   - Living alone: 4.324; 0.604 (0.001–0.823); 0.0092 - Frequency of COPD exacerbation: 1.257; 0.496 (0.032–0.939); 0.0081 - Not having a family doctor: –3.357; 1.435 (0.136–1.337); 0.0076 [looks to be an error in the CI for the OR, since it does not include the point estimate]   [The study report suggests that living alone and frequency of COPD exacerbation total score were predictors of ED visits; however, this conclusion does not fit with the OR cited for these outcomes in the study report (which suggests they are associated with reduced risk). Reported beta-coefficients seem in line with authors’ conclusions but appear to be multiple errors in cited OR, as confirmed by discussion with statistician] | NR |

**Abbreviations:** ARIC, Atherosclerosis Risk in Communities; BMI, body mass index; BNP, B-type natriuretic peptide; BODE, Body mass index, airflow Obstruction, Dyspnea and Exercise capacity; CCI, Charlson Comorbidity Index; CHS, Cardiovascular Health Study; CI, confidence interval; COPD, chronic obstructive pulmonary disease; ED, emergency department; EQ, emotional intelligence; EQ-5D, EuroQol Five Dimensions Questionnaire; FEV1, forced expiratory volume in 1 s; GERD, gastroesophageal reflux disease; GOLD, Global Initiative for Chronic Obstructive Lung Disease; GP, general practitioner; HMO, health maintenance organization; HRU, healthcare resource utilization; ICS, inhaled corticosteroid; ICU, intensive care unit; LABA, long-acting β2-agonist; LCADL, London Chest Activity of Daily Living; LTOT, long-term oxygen therapy; MRC, Medical Research Council; NA, not applicable; NR, not reported; OR, odds ratio; SABA, short-acting β2-agonist; SGRQ, St. George’s Respiratory Questionnaire; UK, United Kingdom; US, United States.

**Supplementary Table 7** Key drivers of costs (n=7 studies)

| **Author, year**  **Country, setting** | **Study design [length of follow-up/time period available for HRU data], sample size** | **Cost data analyzed (dependent variable) and method of multivariate analysis** | **Independent variables included in final model** | **Relevant independent variables found to be statistically significant drivers of costs** | **Relevant independent variables not found to be statistically significant drivers of costs** |
| --- | --- | --- | --- | --- | --- |
| **AbuDagga, 20131**  Country: US  Setting: Inpatient and outpatient | **Retrospective cohort [1 year]**  N=17,382 patients with ≥1 ED, ≥1 hospitalization or ≥2 physician office visits for CB during follow-up period  By exacerbation frequency:   - CB patients with ≥2 exacerbations during their baseline year (the year before index date): N=1392 | - Annual cost of exacerbations (any type) per patient - A generalized linear model with a log-link function (gamma distribution) was fitted to model total per-patient’s exacerbation costs during the follow-up year as a function of baseline exacerbations, controlling for baseline demographic, health plan and clinical characteristics | - Age - Deyo-Charlson Comorbidity Index - Fills for COPD maintenance medications during the follow-up year - Fills for COPD rescue medications during the follow-up year - Gender - Health plan type - Number of exacerbations during baseline year - US geographical region | **For annual cost of exacerbations (any type) per patient, rate ratio (95% CI); *p*-value [rate ratio >1 signifies higher cost]:**   - Health plan type (vs preferred provider organization): - Other (ie not HMO): 1.3216 (1.1293–1.5465); 0.0005 - Deyo-Charlson Comorbidity Index: 1.1555 (1.1231–1.1889); <0.0001 - Fills for COPD rescue medications during the follow-up year: - SAMA: 1.0214 (1.0076–1.0354); 0.0023 - Number of exacerbations during baseline year: 1.0908 (1.0425–1.1415); 0.0002   **Variables associated with lower costs, rate ratio (95% CI); *p*-value:**   - US geographical region (vs South): - Northeast: 0.8584 (0.7480–0.9851); 0.0298 - Fills for COPD maintenance medications during the follow-up year: - Fixed-dose ICS + LABA inhaler: 0.9827 (0.9681–0.9975); 0.0221 | **For annual cost of exacerbations (any type) per patient, rate ratio (95% CI); *p*-value:**   - US geographical region (vs South): - Midwest: 0.8969 (0.8002–1.0053); 0.0617 - West: 0.9121 (0.7769–1.0708); 0.2610 - Health plan type (vs preferred provider organization): - HMO: 0.9857 (0.8769–1.1081); 0.8096 - Gender (vs male): - Female: 0.9703 (0.8845–1.0643); 0.5223 - Age: 1.0041 (0.9996–1.0087); 0.0756 - Fills for COPD maintenance medications during the follow-up year: - LAMA: 0.9934 (0.9805–1.0066); 0.3275 - LABA: 0.9773 (0.9507–1.0046); 0.1023 - ICS: 0.9790 (0.9533–1.0054); 0.1176 - Fills for COPD rescue medications during the follow-up year: - SABA: 0.9948 (0.9836–1.0062); 0.3715 |
| **Pasquale, 201253**  Country: US  Setting: Inpatient and outpatient | **Retrospective cohort [2 years]**  N=8554 COPD patients  By exacerbation frequency:   - ≥1 exacerbation in Year 1 of follow-up (baseline): N=6298 - ≥2 exacerbations in Year 1 of follow-up (baseline): N=3242 | - Annual cost for exacerbation - A generalized linear model with log link and gamma distribution for the error term was used to estimate adjusted healthcare costs, controlling for demographic and clinical characteristics | - Age - Comorbidity - Income - LTOT - Maintenance medications - Moderate exacerbation - Race/ethnicity - Severe exacerbation | **For annual cost of exacerbations, coefficient estimate (95% CI); *p*-value:**   - Age: –0.0072 (–0.0098 to –0.0046); <0.0001 - Race/ethnicity (vs white): - Other: 0.0772 (0.0174–0.1371); 0.0114 - Black: 0.2250 (0.1372–0.3128); <0.0001 - Income (high vs not high): 0.0719 (0.0183–0.1256): 0.0086 - Comorbidity: - Cardiovascular disease (vs no cardiovascular disease): 0.5265 (0.4714–0.5816); <0.0001 - Diabetes (vs no diabetes): 0.3765 (0.3208–0.4323); <0.0001 - Maintenance medications: - ICS + LABA: 0.1031 (0.0452–0.1611); 0.0005 - LAMA: 0.0939 (0.0413–0.1465); 0.0005 - LABA: 0.1361 (0.0347–0.2376); 0.0085 - LTOT use: 0.2164 (0.1691–0.2636); <0.0001 - Severe exacerbation: 0.9925 (0.9285–1.0566); <0.0001 - Moderate exacerbation: 0.1567 (0.0995–0.2139); <0.0001   **Exponentiation of the coefficients from the model suggested that annual costs for exacerbations would be increased by the following ratios for patients with the stated characteristics:**   - For a patient with a severe exacerbation during Year 1 of follow-up vs a patient with no exacerbations: 2.7 - For a patient with a moderate exacerbation during Year 1 of follow-up vs a patient with no exacerbations: 1.17 - LTOT: 1.24 - Cardiovascular disease: 1.69 - Diabetes: 1.46 | **For annual cost of exacerbations, coefficient estimate (95% CI); *p*-value:**   - Race/ethnicity (vs white): - Hispanic: 0.0930  (–0.0098 to 0.1959); 0.0763 |
| **Roberts, 2011a59**  Country: US  Setting: Inpatient | **Retrospective cohort [NR]**  N=6576 COPD patients hospitalized for a severe exacerbation | - Total per-patient COPD-related costs for severe exacerbation (hospitalization) - Gamma generalized linear model incorporating generalized estimating equations | - Hispanic race - ICU days - Length of hospital stays - Severity score - Teaching hospital - Urban hospital | **For total per-patient COPD-related costs for a hospitalization (*p*<0.025, each):**   - Hispanic race [Hospitalizations for Hispanic people had a 12% higher cost than those for white people (*p*<0.0001)] - Severity score - Length of hospital stay - ICU days - Urban hospital - Teaching hospital   [No measures of relative risk were reported other than for Hispanic race] | NR |
| **Silver, 201013**  Country: US  Setting: Inpatient | **Cross-sectional [NA]**  N=69,841 COPD patients hospitalized for exacerbations | - Total cost for admission for COPD exacerbation - Generalized linear models with a gamma family distribution and log link | - Anemia - Anxiety and depression disorders - Congestive heart failure - Cardiac dysrhythmias - Ischemic heart disease - Intrathoracic malignancies - Pulmonary vascular disease - Pneumonia - Renal failure - Weight loss/cachexia   [Data were adjusted for age, gender, race/ethnicity, insurance, hospital type and location and other comorbidities] | **Adjusted cost difference for hospital stay (US dollar [$], cost year NR) (95% CI):**   - Congestive heart failure: $2018.08 ($1938.02–$2100.26) - Ischemic heart disease: $665.90 ($582.40–$739.12) - Cardiac dysrhythmias: $2406.41 ($2305.10–$2532.53) - Pulmonary vascular disease: $2519.74 ($2239.69–$2808.17) - Pneumonia: $4581.54 ($4290.70–$4886.96) - Intrathoracic malignancies: $1398.99 ($651.75–$2385.46) - Anemia: $2430.01 ($2268.20–$2582.31) - Renal failure: $3037.65 ($2804.14–$3278.09) - Weight loss/cachexia: $5303.47 ($3858.46–$7093.13) - Anxiety and depression disorders: $456.96 ($394.68–$522.70) | NR |
| **Small, 201662**  Country: Japan  Setting: Primary care and outpatient (internal medicine physicians and respiratory specialists) | **Cross-sectional [NA]**  N=420 COPD patients  By dyspnea severity (MRC score):   - Moderate-to-severe dyspnea (MRC dyspnea scale score ≥2): N=163 - Patients with no/mild dyspnea (MRC dyspnea scale score <2): N=257 | - Annual total COPD management costs - The study compared annual COPD management costs between propensity matched samples of patients with and without moderate-to-severe dyspnea | - Age - Exacerbation history - Gender - Smoking status - Number of concomitant conditions - Time since diagnosis - Use of triple therapy | **Adjusted annual total COPD management costs, *p*-value:**   - Patients with moderate-to-severe dyspnea vs patients with no/mild dyspnea: €6776.1 vs €4461.3; difference between groups, *p*=0.0236 | NR |
| **Stanford, 200663**  Country: US  Setting: ED and inpatient | **Retrospective cohort [30 days]**  N=NR COPD patients hospitalized (includes patients admitted to ED)  (Data reported by number of admissions, N=59,735)  By type of hospital admission:   - ED visit only: N=20,431 - Standard inpatient: N=33,210 - Severe inpatient intubation/ICU: N=6094 - ICU/no intubation: N=4456 - Intubation/no ICU: N=496 - ICU + intubation: N=1142 | - Costs of hospitalization (inpatient admission) - Ordinary least squares regression was used to evaluate the influence of patient and hospital characteristics on inpatient length of stay and cost | - Age - CCI - Chronic airway obstruction - Emphysema - ED admissions - Gender - ICU treatment - ICU treatment + intubated - Intubation - Hospital type - Large - Medium - Teaching - Payer type - Medicaid - Blue Cross/Blue Shield - HMO - Commercial - Type of hospital presentation - Referral to hospital - Routine admissions to hospitals - Transfer admissions to hospital - Other - Region - South - East - West | **For cost of inpatient stay, estimate; *p*-value:**   - Age (vs unit change): 0.0022; <0.0001 - CCI (vs unit change): 0.0704; <0.0001 - Female (vs male): 0.0604; <0.0001 - Emphysema (vs chronic bronchitis): 0.1229; <0.0001 - ICU treatment (vs no ICU treatment): 0.5766; <0.0001 - Intubated (vs not intubated): 1.0278; <0.0001 - East (vs North): 0.3546; <0.0001 - West (vs North): 0.1630; <0.0001 - Medium hospital (vs small): 0.0895; <0.0001 - Large (vs small): 0.2845; <0.0001   **Variables associated with lower costs, estimate; *p*-value:**   - South (vs North):  –0.0549; <0.0001 - Transfer (vs ED admission): –0.0886; <0.0001 - Routine (vs ED admission): –0.0817; <0.0001 - Other (vs ED admission):  –0.2219; <0.0001 - Medicaid (vs Medicare):  –0.0477; 0.0019 - Blue Cross/Blue Shield (vs Medicare): –0.1016; <0.0001 - HMO (vs Medicare):  –0.1101; <0.0001 - Commercial (vs Medicare): –0.0826; <0.0001 | **For cost of inpatient stay, estimate; *p*-value:**   - Referral (vs ED admission): 0.0139; 0.3458 - Other payer [ie not Medicaid, Blue Cross/Blue Shield, HMO or commercial] (vs Medicare): –0.0031; 0.8740 - ICU treatment + intubated (vs no ICU or intubation):  –0.0218; 0.5850 - Teaching (vs non-teaching): 0.0053; 0.5246 |
| **Tran, 201678**  Country: US  Setting: Inpatient | **Retrospective cohort [6 months]**  N=210 COPD patients admitted to hospital for exacerbation | - Healthcare costs at follow-up 6 months after discharge from hospital - Generalized estimating equations | - Age - Length of stay at baseline admission - Pre-index all-cause costs - Receipt (vs no receipt) of appropriate pharmacotherapy with an inhaled bronchodilator | **All-cause costs at 6 months post-discharge, relative risk; *p*-value:**   - Higher (vs lower) pre-index all-cause costs: 1.002; <0.01 - Longer length of stay at baseline admission: 1.08; 0.01   **COPD-related costs at 6 months post-discharge, relative risk; *p*-value:**   - Older (vs younger) patients: 1.06; <0.01 - Higher (vs lower) pre-index COPD-related costs: 1.004; <0.01   **COPD-related costs at 6 months post-discharge; *p*-value:**   - Receipt (vs no receipt) of appropriate pharmacotherapy with an inhaled bronchodilator: $2181 (vs $1017); 0.01 | **All-cause costs at 6 months post-discharge; *p*-value:**   - Receipt (vs no receipt) of appropriate pharmacotherapy with an inhaled bronchodilator: $13,750 (vs $9981); 0.23   [Abstract-only publication, so list of non-significant variables might not be exhaustive] |

**Abbreviations:** CB, chronic bronchitis; CCI, Charlson Comorbidity Index; CI, confidence interval; COPD, chronic obstructive pulmonary disease; ED, emergency department; HMO, Health maintenance organization; HRU, healthcare resource utilization; ICS, inhaled corticosteroid; ICU, intensive care unit; LABA, long-acting β2-agonist; LAMA, long-acting muscarinic antagonist; LTOT, long-term oxygen therapy; MRC, Medical Research Council; NA, not applicable; NR, not reported; SABA, short-acting β2-agonist; SAMA, short-acting muscarinic antagonist; US, United States.

**REFERENCES**

1. Abudagga A, Sun SX, Tan H, Solem CT. Exacerbations among chronic bronchitis patients treated with maintenance medications from a US managed care population: an administrative claims data analysis. *Int J Chron Obstruct Pulmon Dis.* 2013;8:175–185.

2. Abusaid GH, Barbagelata A, Tuero E, Mahmood A, Sharma G. Diastolic dysfunction and COPD exacerbation. *Postgrad Med.* 2009;121(4):76–81.

3. Benzo RP, Kirsch JL, Dulohery MM, Abascal-Bolado B. Emotional intelligence: a novel outcome associated with wellbeing and self-management in chronic obstructive pulmonary disease. *Ann Am Thorac Soc.* 2016;13(1):10–16.

4. Blasi F, Cesana G, Conti S, et al. The clinical and economic impact of exacerbations of chronic obstructive pulmonary disease: a cohort of hospitalized patients. *PLoS One.* 2014;9(6):e101228.

5. Bu XN, Yang T, Thompson MA, Hutchinson AF, Irving LB. Changes in the BODE index, exacerbation duration and hospitalisation in a cohort of COPD patients. *Singapore Med J.* 2011;52(12):894–900.

6. Bustamante-Fermosel A, De Miguel-Yanes JM, Duffort-Falcó M, Muñoz J. Mortality-related factors after hospitalization for acute exacerbation of chronic obstructive pulmonary disease: the burden of clinical features. *Am J Emerg Med.* 2007;25(5):515–522.

7. Carrasco Garrido P, de Miguel Díez J, Rejas Gutiérrez J, et al. Negative impact of chronic obstructive pulmonary disease on the health-related quality of life of patients. Results of the EPIDEPOC study. *Health Qual Life Outcomes.* 2006;4:31.

8. de Miguel-Díez J, Carrasco-Garrido P, Rejas-Gutiérrez J, et al. The influence of heart disease on characteristics, quality of life, use of health resources, and costs of COPD in primary care settings. *BMC Cardiovasc Disord.* 2010;10:8.

9. Chen Y, Li Q, Johansen H. Age and sex variations in hospital readmissions for COPD associated with overall and cardiac comorbidity. *Int J Tuberc Lung Dis.* 2009;13(3):394–399.

10. Collins EG, Halabi S, Langston M, Schnell T, Tobin MJ, Laghi F. Sexual dysfunction in men with COPD: impact on quality of life and survival. *Lung.* 2012;190(5):545–556.

11. Dalal AA, Shah M, D'Souza AO, Rane P. Costs of inpatient and emergency department care for chronic obstructive pulmonary disease in an elderly Medicare population. *J Med Econ.* 2010a;13(4):591–598.

12. Lindenauer PK, Pekow P, Gao S, Crawford AS, Gutierrez B, Benjamin EM. Quality of care for patients hospitalized for acute exacerbations of chronic obstructive pulmonary disease. *Ann Intern Med.* 2006;144(12):894–903.

13. Silver H, Blanchette CM, Roberts M, Petersen H, StCharles ME. Prevalence of comorbidities in patients hospitalized for COPD exacerbations and impact on impatient mortality and hospital expenditures. *Am J Respir Crit Care Med.* 2010;181:A5943.

14. Xu X, Knight T, Baik R, Tu X, Parker JM. Patient characteristics, health resource utilization (HRU) and treatment costs of chronic obstructive pulmonary disease (COPD) patients treated in hospital facilities for exacerbations. *Am J Respir Crit Care Med.* 2012;185:A3047.

15. Dalal AA, Shah M, D'Souza AO. Economic burden of health care admissions related to chronic obstructive pulmonary disease exacerbations: data from inpatient administrative database. *Am J Respir Crit Care Med.* 2010b;181:A1492.

16. Dalal AA, Patel J, D'Souza A, Farrelly E, Nagar S, Shah M. Impact of COPD exacerbation frequency on costs for a managed care population. *J Manag Care Spec Pharm.* 2015;21(7):575–583.

17. Patel J, Dalal AA, Nagar S, D'Souza AO, Shah M, Farrelly E. Economic burden of frequently and infrequently exacerbating patients with a diagnosis of COPD. *Am J Respir Crit Care Med.* 2013;187:A1437.

18. Dhamane AD, Witt EA, Su J. Associations between COPD severity and work productivity, health-related quality of life, and health care resource use: a cross-sectional analysis of national survey data. *J Occup Environ Med.* 2016;58(6):e191–e197.

19. Dhamane A, Witt EA, Hernandez G, Su J. Association between COPD severity and work productivity, quality of life and healthcare resource use. *Am J Respir Crit Care Med.* 2015;191:A4447.

20. Dushianthan A, Temblett P, Bhatta A. Outcome of a cohort of older population with COPD, admitted with hypercapnaeic respiratory failure and acidosis. *Am J Respir Crit Care Med.* 2010;181:A1506.

21. DuVall S, Brown K, Nici L, et al. Incidence and predictors of hospital readmission among patients with chronic obstructive pulmonary disease in the Department of Veterans Affairs. *Chest.* 2015;148(4 Suppl):684A.

22. Escarrabill J, Torrente E, Esquinas C, et al. Clinical audit of patients hospitalized due to COPD exacerbation. MAG-1 Study. *Arch Bronconeumol.* 2015;51(10):483–489.

23. Esteban C, Arostegui I, Aburto M, et al. Chronic obstructive pulmonary disease subtypes. Transitions over time. *PLoS One.* 2016;11(9):e0161710.

24. Gadre S, Duggal A, Guzman J. Epidemiological characteristics and outcomes of patients with severe COPD requiring mechanical ventilation. *Chest.* 2014;146(4 Suppl 2):58A.

25. Gallego M, Pomares X, Capilla S, et al. C-reactive protein in outpatients with acute exacerbation of COPD: its relationship with microbial etiology and severity. *Int J Chron Obstruct Pulmon Dis.* 2016;11:2633–2640.

26. Garcia-Aymerich J, Feléz MA, Escarrabill J, et al. Physical activity and its determinants in severe chronic obstructive pulmonary disease. *Med Sci Sports Exerc.* 2004;36(10):1667–1673.

27. Garcia-Aymerich J, Serra Pons I, Mannino DM, Maas AK, Miller DP, Davis KJ. Lung function impairment, COPD hospitalisations and subsequent mortality. *Thorax.* 2011;66(7):585–590.

28. Gavazzi A, De Maria R, Manzoli L, et al. Palliative needs for heart failure or chronic obstructive pulmonary disease: results of a multicenter observational registry. *Int J Cardiol.* 2015;184:552–558.

29. Huang H, Lin I, Goldstein B, Rosiello R, Menzin J. Rehospitalization rates and mortality among patients with severe chronic obstructive pulmonary disease receiving long-term oxygen therapy in a managed-care setting. *Am J Respir Crit Care Med.* 2014;189:A3058.

30. Keilty S, Murphy P, Hart N. 1 year UK survival readmission rate in chronic obstructive pulmonary disease (COPD) survivors following acute non-invasive ventilation (NIV). *Thorax.* 2013;68(Suppl. 3):A47–A48.

31. Koleva D, Motterlini N, Banfi P, Garattini L. Healthcare costs of COPD in Italian referral centres: a prospective study. *Respir Med.* 2007;101(11):2312–2320.

32. Lusuardi M, Lucioni C, De Benedetto F, Mazzi S, Sanguinetti CM, Donner CF. GOLD severity stratification and risk of hospitalisation for COPD exacerbations. *Monaldi Arch Chest Dis.* 2008;69(4):164–169.

33. Mahmud N, McNabb-Balter J, Chan WW. The impact of gastroesophageal reflux on the length of hospital stay for COPD exacerbations: a report of the nationwide inpatient sample. *Gastroenterology.* 2015;148:S606.

34. Mapel DW, Dutro MP, Marton JP, Woodruff K, Make B. Identifying and characterizing COPD patients in US managed care. A retrospective, cross-sectional analysis of administrative claims data. *BMC Health Serv Res.* 2011;11:43.

35. Martín A, Rodríguez-González Moro JM, Izquierdo JL, Gobartt E, de Lucas P. Health-related quality of life in outpatients with COPD in daily practice: the VICE Spanish Study. *Int J Chron Obstruct Pulmon Dis.* 2008;3(4):683–692.

36. Matkovic Z, Huerta A, Soler N, et al. Predictors of adverse outcome in patients hospitalised for exacerbation of chronic obstructive pulmonary disease. *Respiration.* 2012;84(1):17–26.

37. McGhan R, Radcliff T, Fish R, Sutherland ER, Welsh C, Make B. Predictors of rehospitalization and death after a severe exacerbation of COPD. *Chest.* 2007;132(6):1748–1755.

38. Merinopoulou E, Raluy-Callado M, Ramagopalan S, MacLachlan S, Khalid JM. COPD exacerbations by disease severity in England. *Int J Chron Obstruct Pulmon Dis.* 2016;11:697–709.

39. Mullerova H, Han MK, Baxter R, Davis K. GOLD 2013 COPD classification: a comparison with GOLD 2011 and COPD outcomes in the UK Clinical Practice Research Datalink (CPRD) COPD cohort. *Am J Respir Crit Care Med.* 2014;189:A5965.

40. Punekar YS, Shukla A, Muellerova H. Comparing COPD costs by exacerbation frequency and dyspnoea level in a primary care setting in the United Kingdom. *Value Health.* 2013;16(7):A723.

41. Punekar YS, Wurst K, Shukla A. COPD management costs among newly diagnosed COPD patients in the UK primary care setting. *Am J Respir Crit Care Med.* 2013;187:A4373.

42. Punekar YS, Shukla A, Muellerova H. Disease management costs associated with COPD patients with infrequent exacerbations in the UK primary care setting. *Am J Respir Crit Care Med.* 2013;187:A4374.

43. Punekar YS, Landis SH, Bonar K, Le H. Health care utilisation and costs among COPD patients newly prescribed maintenance therapy in the United Kingdom (UK). *Thorax.* 2015b;70:A142–A143.

44. Punekar YS, Shukla A, Müllerova H. COPD management costs according to the frequency of COPD exacerbations in UK primary care. *Int J Chron Obstruct Pulmon Dis.* 2014;9:65–73.

45. Merinopoulou E, Raluy-Callado M, Ramagopalan S, MacLachlan S, Khalid JM. Resource use and exacerbations of chronic obstructive pulmonary disease (COPD) by GOLD categories. *Value Health.* 2015;18(7):A506–A507.

46. Miravitlles M, Calle M, Alvarez-Gutierrez F, Gobartt E, López F, Martín A. Exacerbations, hospital admissions and impaired health status in chronic obstructive pulmonary disease. *Qual Life Res.* 2006;15(3):471–480.

47. Mittmann N, Kuramoto L, Seung SJ, Haddon JM, Bradley-Kennedy C, Fitzgerald JM. The cost of moderate and severe COPD exacerbations to the Canadian healthcare system. *Respir Med.* 2008;102(3):413–421.

48. FitzGerald JM, Haddon JM, Bradley-Kennedy C, Kuramoto L, Ford GT, The RUSIC Study Group. Resource Use Study in COPD (RUSIC): a prospective study to quantify the effects of COPD exacerbations on health care resource use among COPD patients. *Can Respir J.* 2007;14(3):145–152.

49. Molinari N, Briand C, Vachier I, et al. Hospitalizations for COPD exacerbations: trends and determinants of death. *COPD.* 2015;12(6):621–627.

50. Nantsupawat T, Limsuwat C, Nugent K. Factors affecting chronic obstructive pulmonary disease early rehospitalization. *Chron Respir Dis.* 2012;9(2):93–98.

51. Nguyen HQ, Chu L, Liu I-L A, et al. Higher level of regular physical activity is associated with lower risk of 30-day readmissions in patients with COPD. *Am J Respir Crit Care Med.* 2014;189:A2452.

52. Nishi SP, Zhang W, Kuo YF, Sharma G. Oxygen therapy use in older adults with chronic obstructive pulmonary disease. *PLoS One.* 2015;10(3):e0120684.

53. Pasquale MK, Sun SX, Song F, Hartnett HJ, Stemkowski SA. Impact of exacerbations on health care cost and resource utilization in chronic obstructive pulmonary disease patients with chronic bronchitis from a predominantly Medicare population. *Int J Chron Obstruct Pulmon Dis.* 2012;7:757–764.

54. Philip J, Lowe A, Gold M, et al. Using administrative datasets to assist prognostication in chronic obstructive pulmonary disease (COPD). *Palliat Med.* 2010;24:S25.

55. Pitassi M, Vitale C, D'Amato M, Stanziola A, Mormile M, Molino A. Impact of bronchiectasis on duration of hospitalization in patients with exacerbations of COPD. *Eur Respir J.* 2015;46(Suppl. 59):PA4701.

56. Pretto JJ, McDonald VM, Wark PA, Hensley MJ. Multicentre audit of inpatient management of acute exacerbations of chronic obstructive pulmonary disease: comparison with clinical guidelines. *Intern Med J.* 2012;42(4):380–387.

57. Punekar YS, Wurst K, Shukla A. Resource use and costs up to two years post diagnosis among newly diagnosed COPD patients in the UK primary care setting: a retrospective cohort study. *COPD.* 2015;12(3):267–275.

58. Quintana JM, Esteban C, Garcia-Gutierrez S, et al. Predictors of hospital admission two months after emergency department evaluation of COPD exacerbation. *Respiration.* 2014;88(4):298–306.

59. Roberts MH, Borrego M, Petersen H, Kharat A, Blanchette C. Estimating the burden and course of severe COPD exacerbations in the U.S. Hispanic population. *Am J Respir Crit Care Med.* 2011a;183:A1496.

60. Short PM, Williamson PA, Singanayagam A, Akram A, Chalmers JD, Schembri S. Guideline adherent therapy and reduced mortality and length of stay in adults hospitalised with exacerbations of COPD. *Thorax.* 2013;68:A136.

61. Roberts CM, Stone RA, Lowe D, Pursey NA, Buckingham RJ. Co-morbidities and 90-day outcomes in hospitalized COPD exacerbations. *COPD.* 2011b;8(5):354–361.

62. Small M, Holbrook T, Wood R, Mullerova H, Naya I, Punekar YS. Prevalence and burden of dyspnoea among COPD patients in Japan. *Int J Clin Pract.* 2016;70(8):676–681.

63. Stanford RH, Shen Y, McLaughlin T. Cost of chronic obstructive pulmonary disease in the emergency department and hospital: an analysis of administrative data from 218 US hospitals. *Treat Respir Med.* 2006;5(5):343–349.

64. Steer J, Gibson GJ, Bourke SC. Longitudinal change in quality of life following hospitalisation for acute exacerbations of COPD. *BMJ Open Respir Res.* 2015;2(1):e000069.

65. Stefan MS, Nathanson B, Lindenauer P, Higgins T, Steingrub J. Characteristics, ventilation strategies, and outcomes of patients hospitalized in intensive care units with an acute exacerbation of COPD. *Am J Respir Crit Care Med.* 2014;189:A1632.

66. Stefan MS, Shieh MS, Pekow PS, Hill N, Rothberg MB, Lindenauer PK. Trends in mechanical ventilation among patients hospitalized with acute exacerbations of COPD in the United States, 2001 to 2011. *Chest.* 2015;147(4):959–968.

67. Suissa S, Dell'Aniello S, Ernst P. Long-term natural history of chronic obstructive pulmonary disease: severe exacerbations and mortality. *Thorax.* 2012;67(11):957–963.

68. Thomas M, Radwan A, Stonham C, Marshall S. COPD exacerbation frequency, pharmacotherapy and resource use: an observational study in UK primary care. *COPD.* 2014;11(3):300–309.

79. Thomas M, Radwan A, Stonham C, Marshall S. Exacerbation frequency and maintenance treatment of COPD in UK clinical practice. *Thorax.* 2011;66(Suppl 4):A153.

70. Valido A, Gomez-Bastero A, Almadana V, Luque E, Montemayor T. Clinical and functional differences, exercise capacity and physical activity among frequent and not frequent exacerbators in COPD patients. *Eur Respir J.* 2014;44(58):P4883.

71. Vallabhajosyula S, Haddad TM, Sundaragiri PR, et al. Role of B-type natriuretic peptide in predicting in-hospital outcomes in acute exacerbation of chronic obstructive pulmonary disease: a five-year retrospective analysis. *Am J Respir Crit Care Med.* 2015;191:A2938.

72. Vitacca M, Escarrabill J, Galavotti G, et al. Home mechanical ventilation patients: a retrospective survey to identify level of burden in real life. *Monaldi Arch Chest Dis.* 2007;67(3):142–147.

73. Vitacca M, Bianchi L, Bazza A, Clini EM. Advanced COPD patients under home mechanical ventilation and/or long term oxygen therapy: Italian healthcare costs. *Monaldi Arch Chest Dis.* 2011;75(4):207–214.

74. Wang Q, Bourbeau J. Outcomes and health-related quality of life following hospitalization for an acute exacerbation of COPD. *Respirology.* 2005;10(3):334–340.

75. Yeo J, Karimova G, Bansal S. Co-morbidity in older patients with COPD--its impact on health service utilisation and quality of life, a community study. *Age Ageing.* 2006;35(1):33–37.

76. Foo J, Landis SH, Maskell J, et al. Continuing to Confront COPD International Patient Survey: economic impact of COPD in 12 countries. *PLoS One.* 2016;11(4):e0152618.

77. Sharafkhaneh A, Altan AE, Colice GL, et al. A simple rule to identify patients with chronic obstructive pulmonary disease who may need treatment reevaluation. *Respir Med.* 2014;108(9):1310–1320.

78. Tran M, Xiang P, Rascati KL, et al. HEDIS quality measure performance and other factors predictive of health care costs following COPD-related admission. *Value Health.* 2016;19:A122.

79. Yu AP, Yang H, Wu EQ, Setyawan J, Mocarski M, Blum S. Incremental third-party costs associated with COPD exacerbations: a retrospective claims analysis. *J Med Econ.* 2011;14(3):315–323.

80. García-Polo C, Alcázar-Navarrete B, Ruiz-Iturriaga LA, et al. Factors associated with high healthcare resource utilisation among COPD patients. *Respir Med.* 2012;106(12):1734–1742.

81. Gatheral T, Kumar N, Sansom B, et al. COPD-related bronchiectasis; independent impact on disease course and outcomes. *COPD.* 2014;11(6):605–614.
